# Supplementary material for: SAR study on N2,N4-disubstituted pyrimidine-2,4-diamines as effective CDK2/CDK9 inhibitors and antiproliferative agents
Source: Royal Society of Chemistry journal article supplement (doi:10.1039/c8ra01440j), 2018-01-01

## Supporting Information

### **SAR study on $N^2$ , $N^4$ -disubstitued pyrimidine-2,4-diamines as effective CDK2/CDK9 inhibitors and antiproliferative agents**

Liandong Jing<sup>a</sup>, Yanbo Tang<sup>a</sup>, Masuo Goto<sup>b</sup>, Kuo-Hsiung Lee<sup>b,c</sup>, Zhiyan Xiao<sup>a,\*</sup>

<sup>a</sup> *Beijing Key Laboratory of Active Substance Discovery and Druggability Evaluation, Institute of Materia Medica, Chinese Academy of Medical Sciences and Peking Union Medical College, Beijing 100050, China*

<sup>b</sup> *Natural Products Research Laboratories, UNC Eshelman School of Pharmacy, University of North Carolina, Chapel Hill, North Carolina 27599-7568, USA*

<sup>c</sup> *Chinese Medicine Research and Development Center, China Medical University and Hospital, Taichung, Taiwan*

## 1. Yields of target compounds

| <b>Compd.</b> | <b>Yield</b> | <b>Compd.</b> | <b>Yield</b> |
|---------------|--------------|---------------|--------------|
| <b>2a</b>     | <b>50%</b>   | <b>3d</b>     | <b>22%</b>   |
| <b>2b</b>     | <b>46%</b>   | <b>3e</b>     | <b>47%</b>   |
| <b>2c</b>     | <b>20%</b>   | <b>3f</b>     | <b>55%</b>   |
| <b>2d</b>     | <b>24%</b>   | <b>3g</b>     | <b>40%</b>   |
| <b>2e</b>     | <b>53%</b>   | <b>3h</b>     | <b>68%</b>   |
| <b>2f</b>     | <b>57%</b>   | <b>3i</b>     | <b>36%</b>   |
| <b>2g</b>     | <b>38%</b>   | <b>3j</b>     | <b>51%</b>   |
| <b>2h</b>     | <b>42%</b>   | <b>3k</b>     | <b>74%</b>   |
| <b>2i</b>     | <b>20%</b>   | <b>3l</b>     | <b>28%</b>   |
| <b>3a</b>     | <b>52%</b>   | <b>3m</b>     | <b>51%</b>   |
| <b>3b</b>     | <b>53%</b>   | <b>3n</b>     | <b>34%</b>   |
| <b>3c</b>     | <b>61%</b>   | <b>3o</b>     | <b>57%</b>   |

## 2. HPLC chromatogram for 2a, 2d and 3b

The compounds were analyzed on a Shimadzu LC-6AD instrument.

Column: (4.6\*150mm, Shimadzu Shim-pack VP-ODS)

Column temperature: 40 °C

Mobile phase: methanol/water with 2% Et<sub>3</sub>N (v/v, gradient elution method: from 70:30 to 100:0)

Elution time: 30 mins

Flow rate: 0.3 ml/min

(1) For 2a:

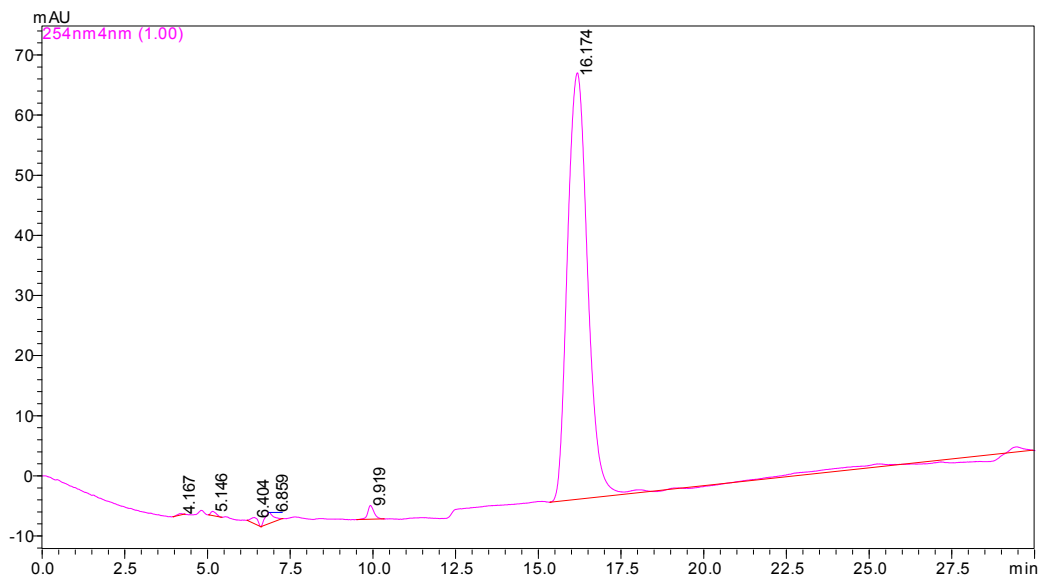

| Retention time | Area  | Height | Proportion |
|----------------|-------|--------|------------|
| 4.167          | 2943  | 270    | 0.0950     |
| 5.146          | 7902  | 699    | 0.2551     |
| 6.404          | 14195 | 993    | 0.4582     |

|        |         |       |         |
|--------|---------|-------|---------|
| 6.859  | 33718   | 1871  | 1.0884  |
| 9.919  | 30677   | 2302  | 0.9903  |
| 16.174 | 3008464 | 70928 | 97.1130 |

(2) For 2d:

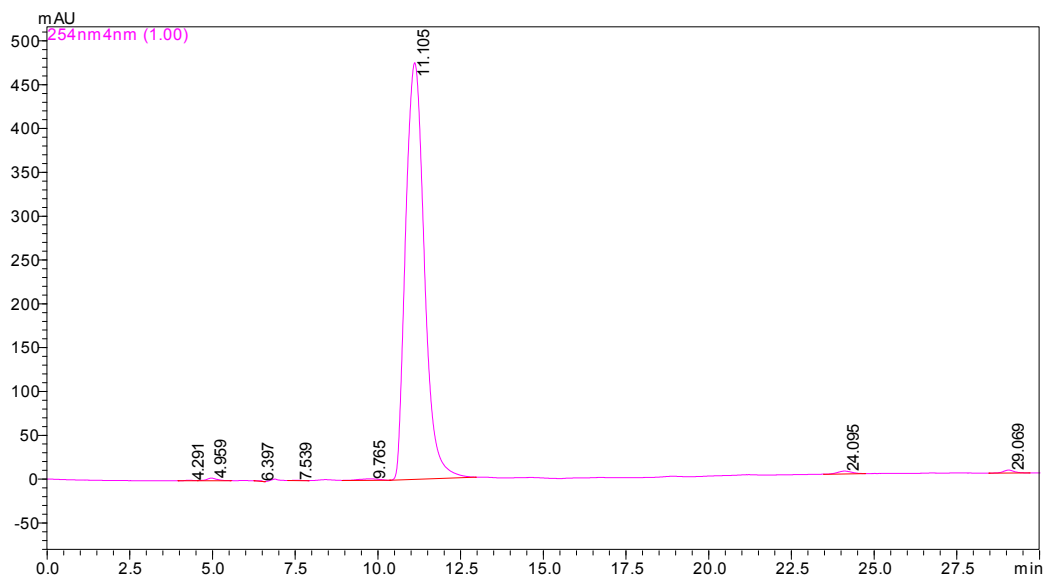

| Retention time | Area  | Height | Proportion |
|----------------|-------|--------|------------|
| 4.291          | 12622 | 620    | 0.0663     |
| 4.959          | 63908 | 2987   | 0.3359     |
| 6.397          | 8337  | 699    | 0.0438     |
| 7.539          | 6348  | 378    | 0.0334     |
| 9.765          | 69941 | 1696   | 0.3676     |

|        |          |        |         |
|--------|----------|--------|---------|
| 11.105 | 18694153 | 475274 | 98.2547 |
| 24.095 | 94687    | 3181   | 0.4977  |
| 29.069 | 76218    | 3342   | 0.4006  |

(3) For 3b:

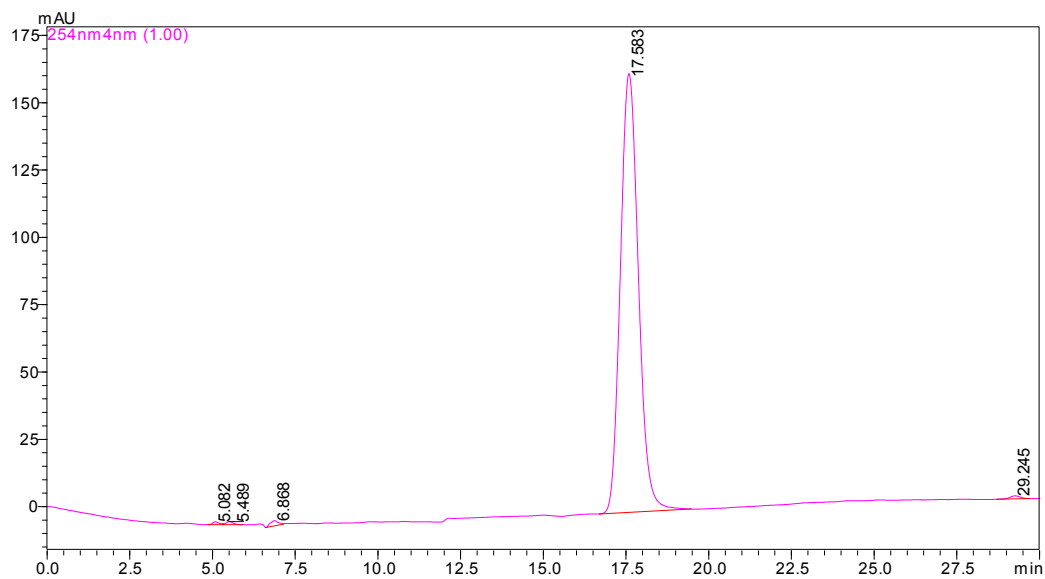

| Retention time | Area    | Height | Proportion |
|----------------|---------|--------|------------|
| 5.082          | 13819   | 1022   | 0.2203     |
| 5.489          | 17491   | 1125   | 0.2788     |
| 6.868          | 32959   | 1993   | 0.5254     |
| 17.583         | 6183849 | 162931 | 98.5839    |
| 29.245         | 24556   | 1148   | 0.3915     |

### 3. NMR spectra for target compounds

#### <sup>1</sup>H NMR spectrum for Compound 2a:

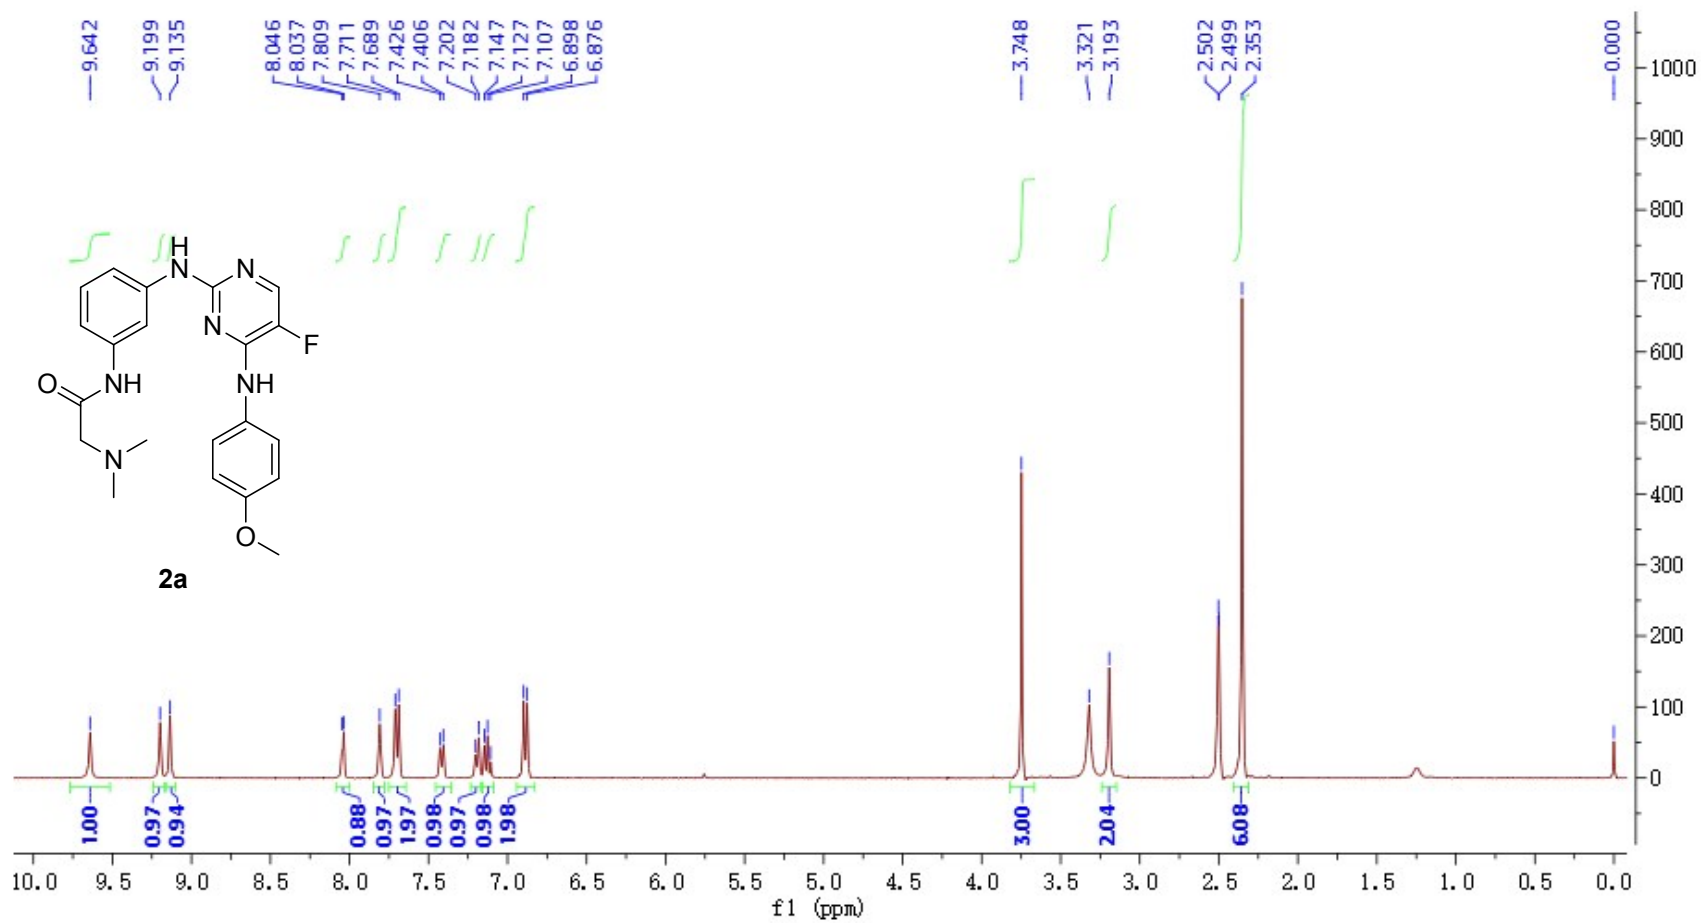

<sup>13</sup>C NMR spectrum for Compound 2a:

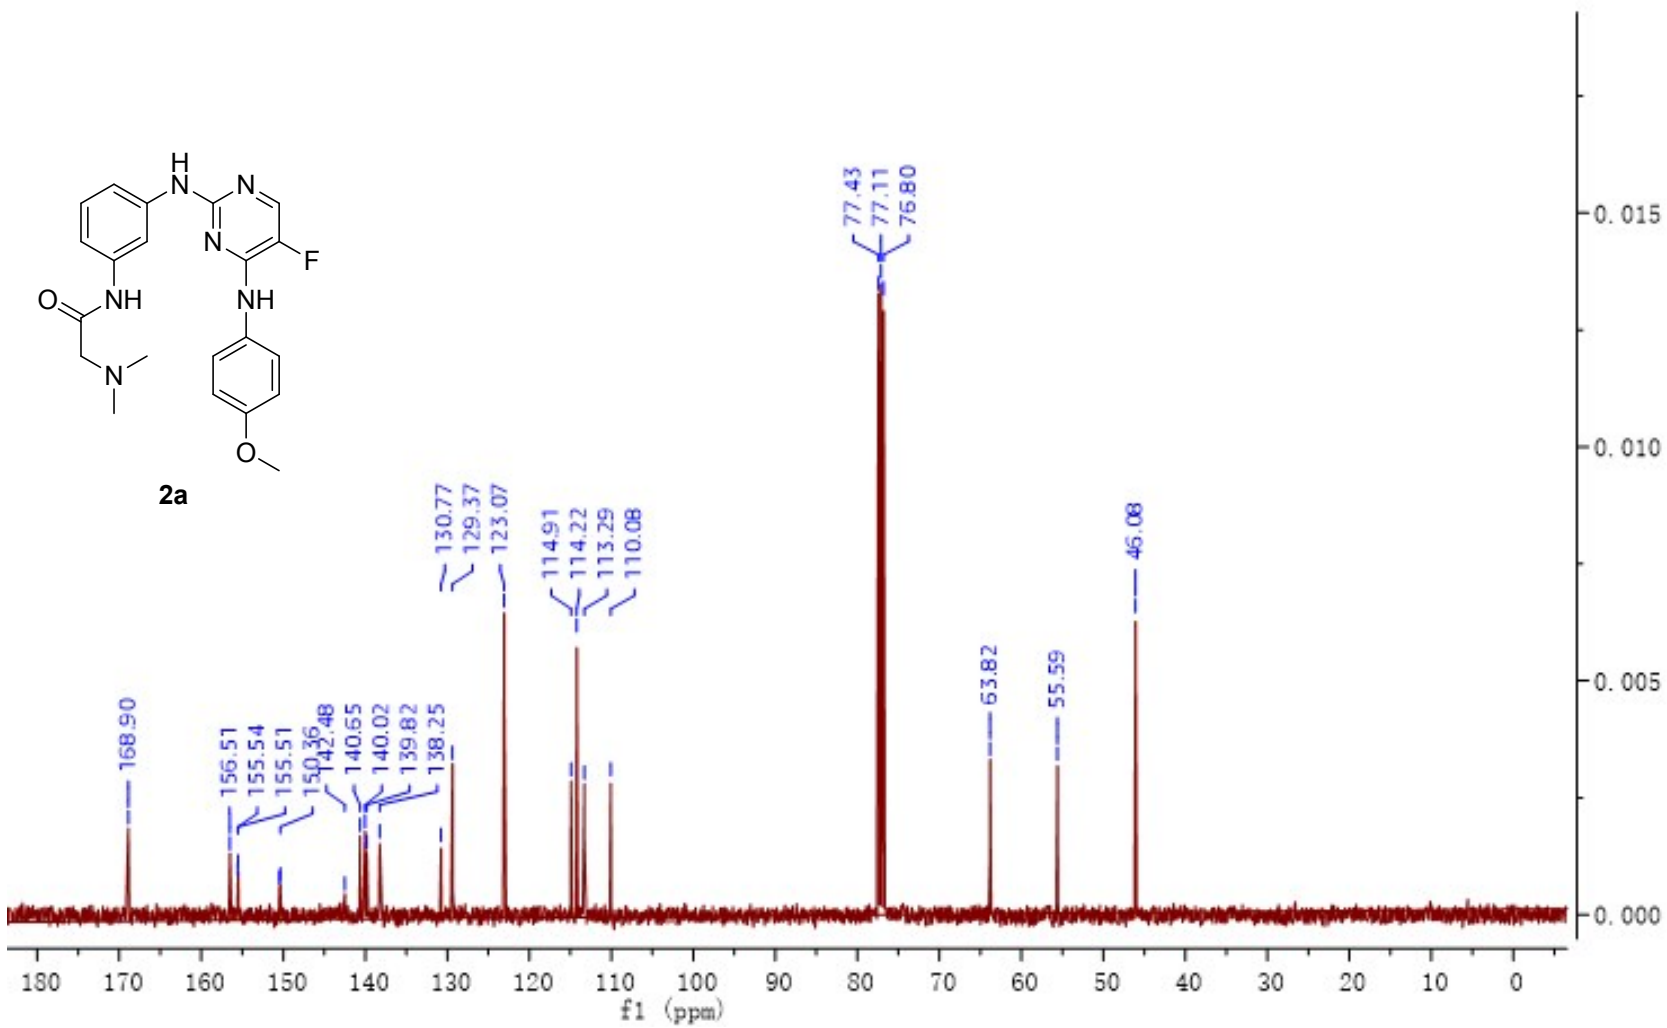

**<sup>1</sup>H NMR spectrum for Compound 2b:**

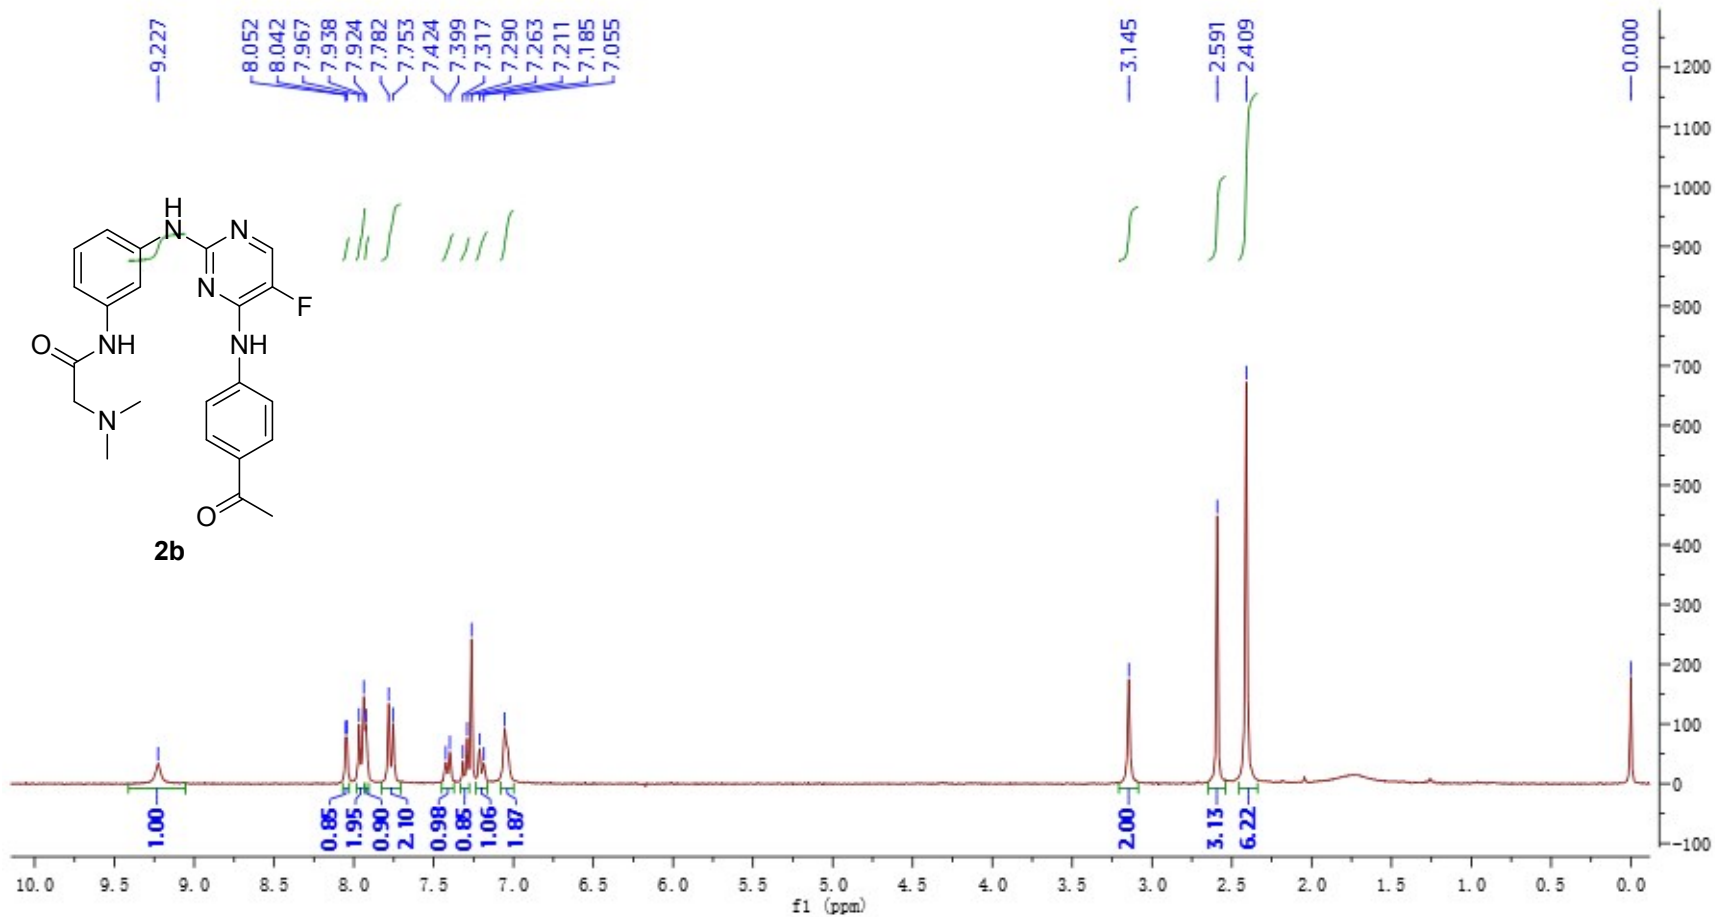



**<sup>13</sup>C NMR spectrum for Compound 2b:**

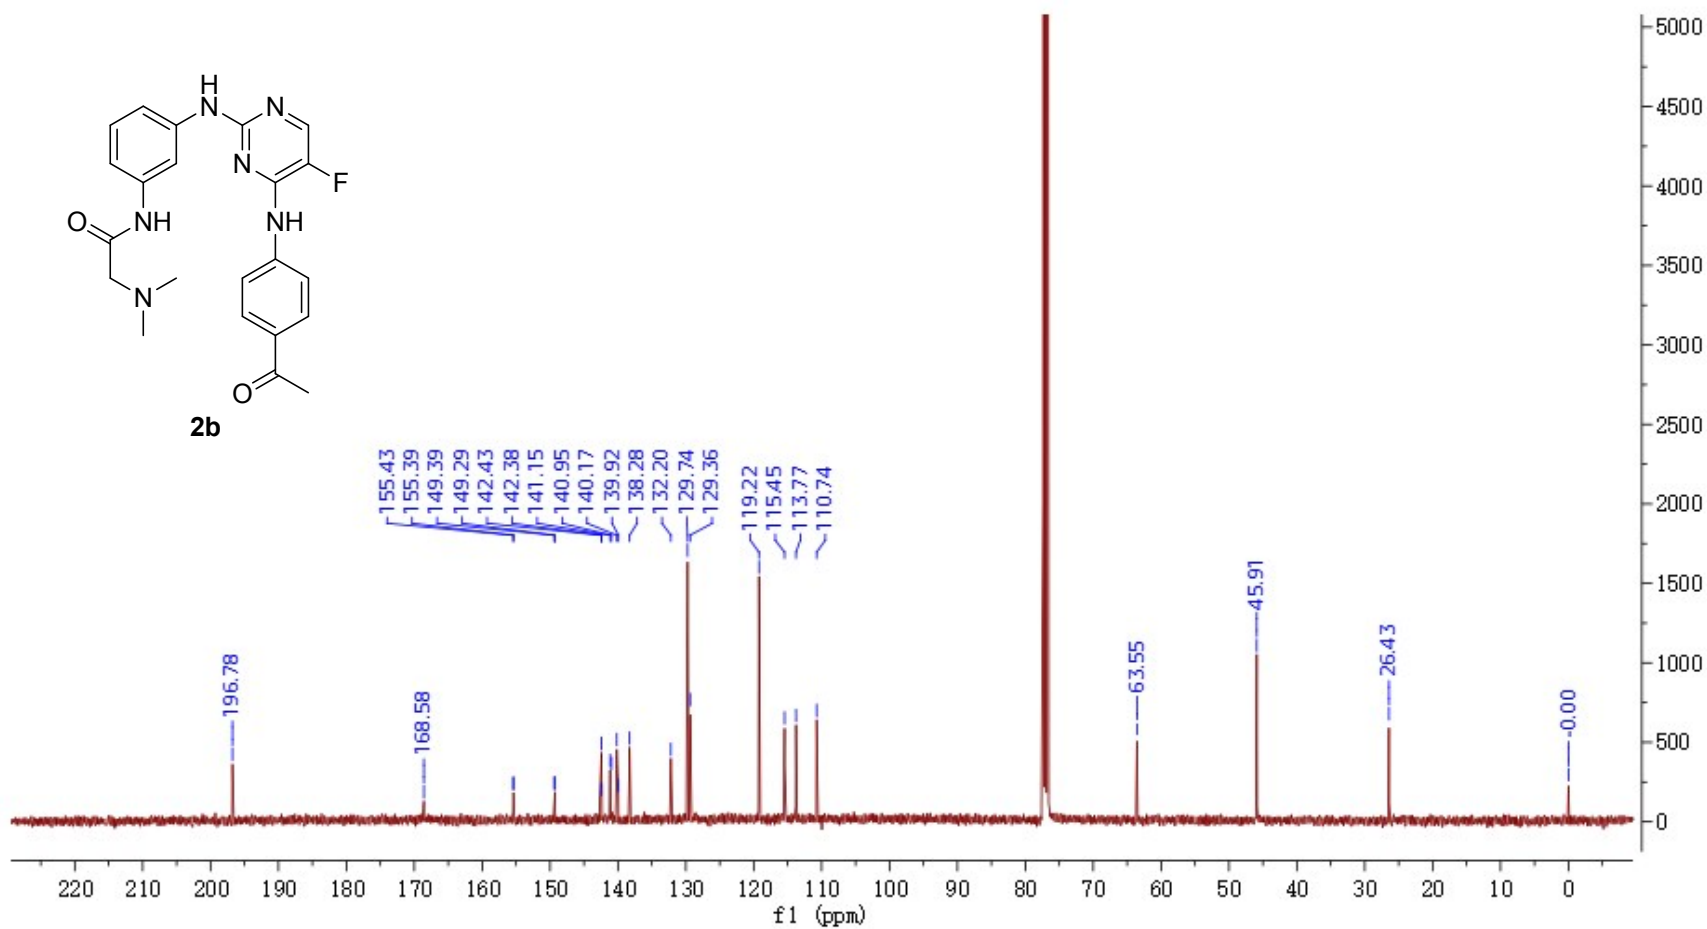

**<sup>1</sup>H NMR spectrum for Compound 2c:**

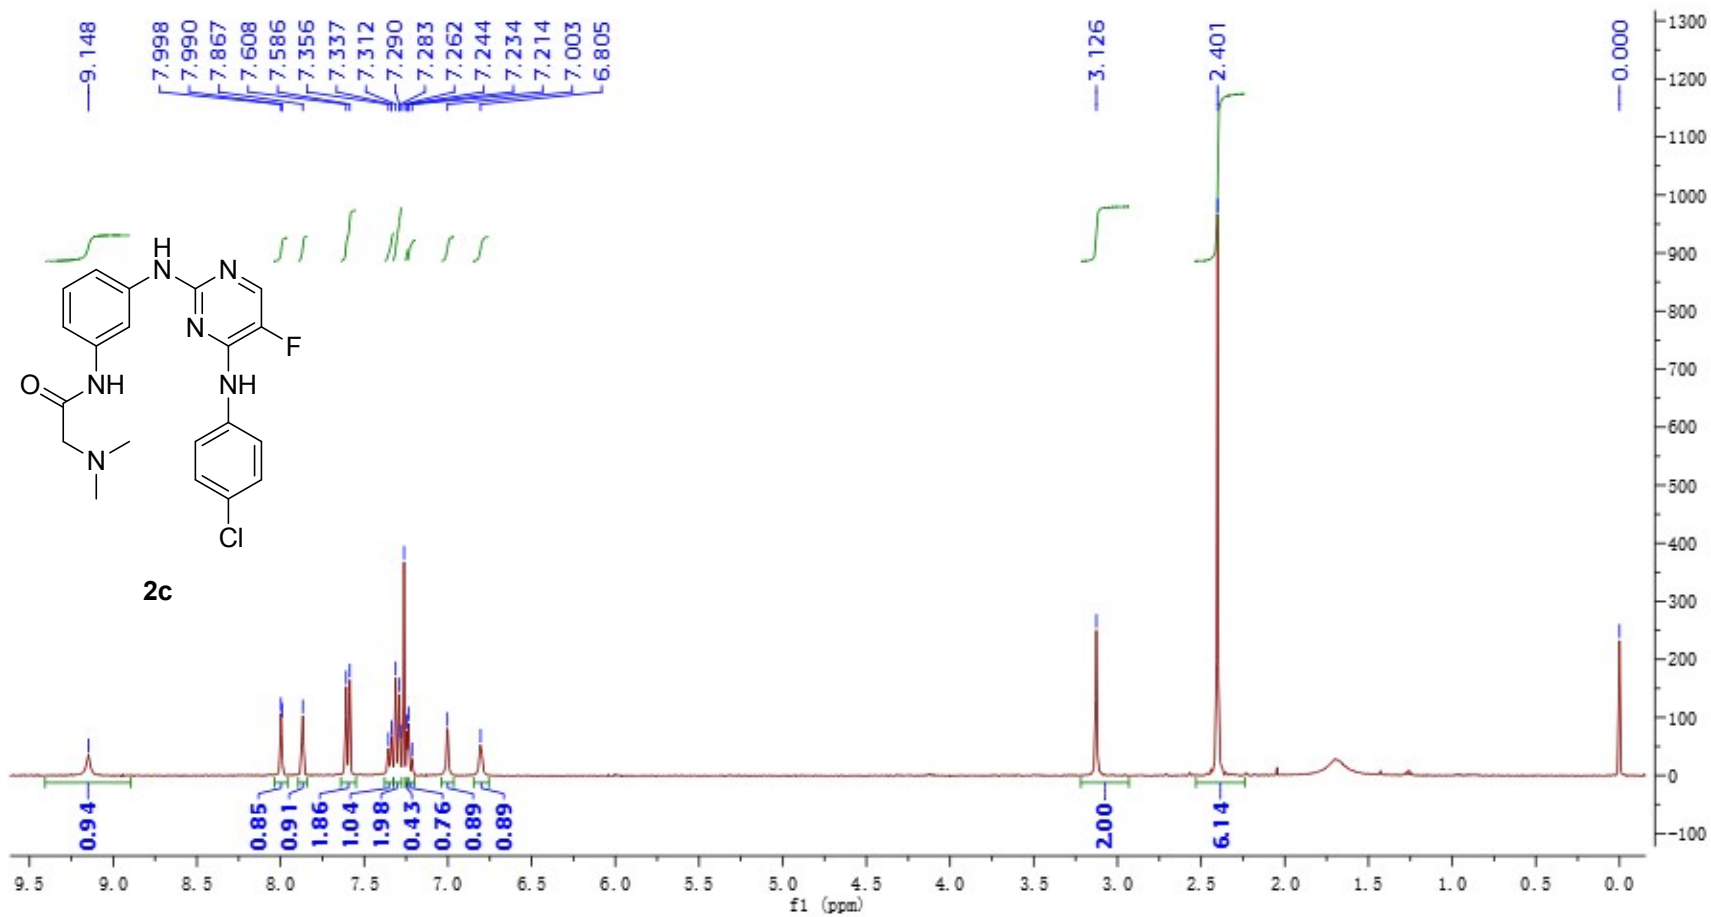

<sup>13</sup>C NMR spectrum for Compound **2c**:

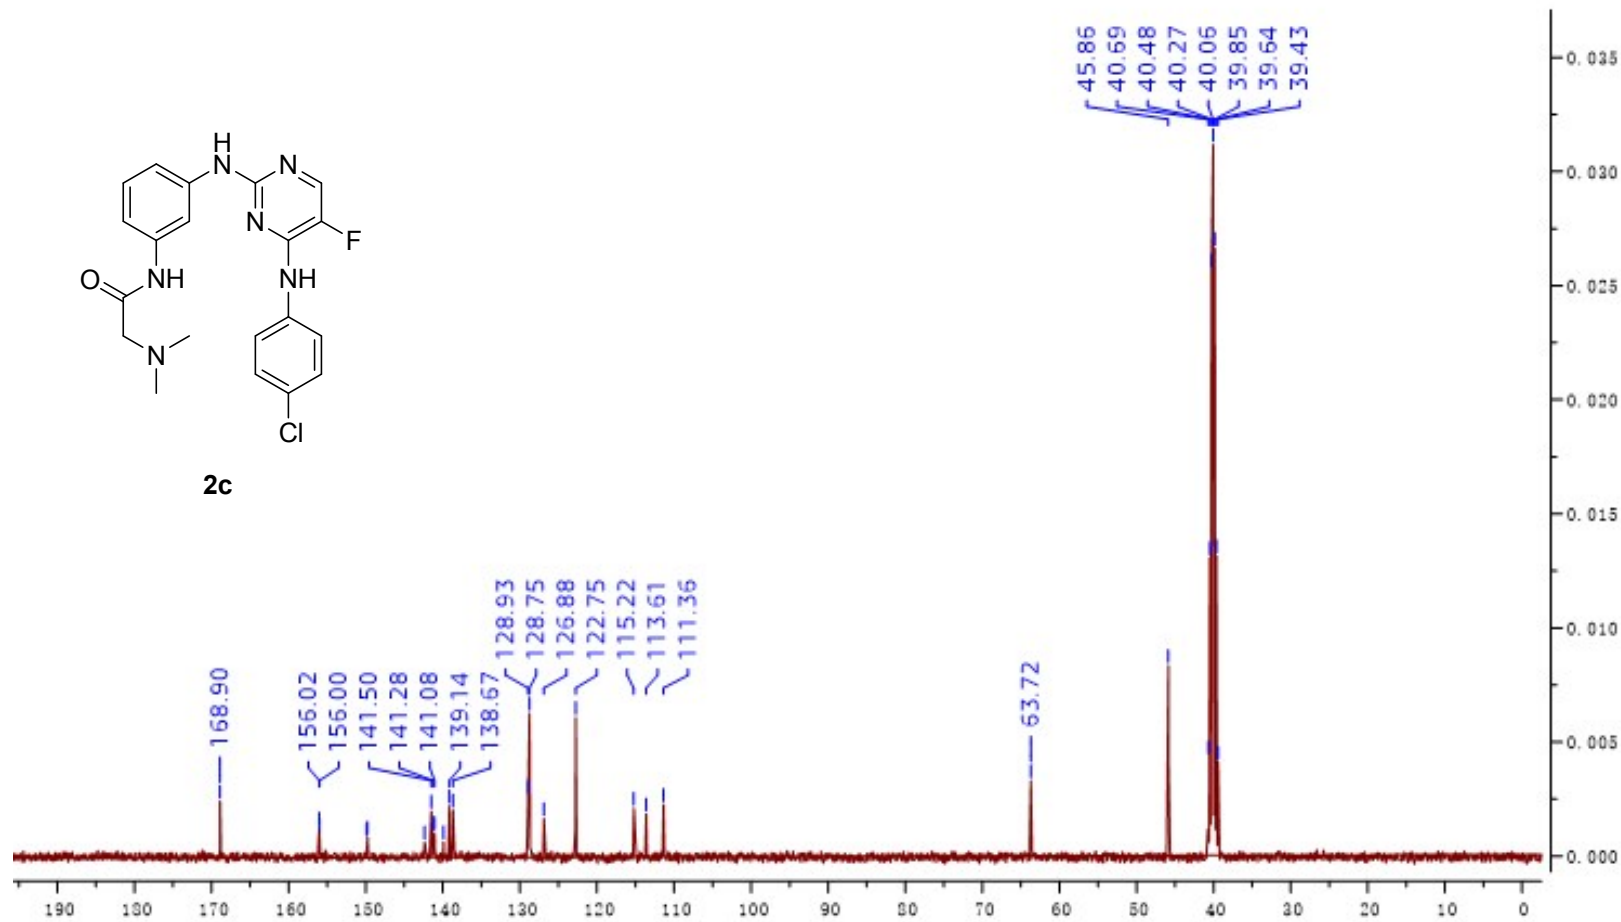

**<sup>1</sup>H NMR spectrum for Compound 2d:**

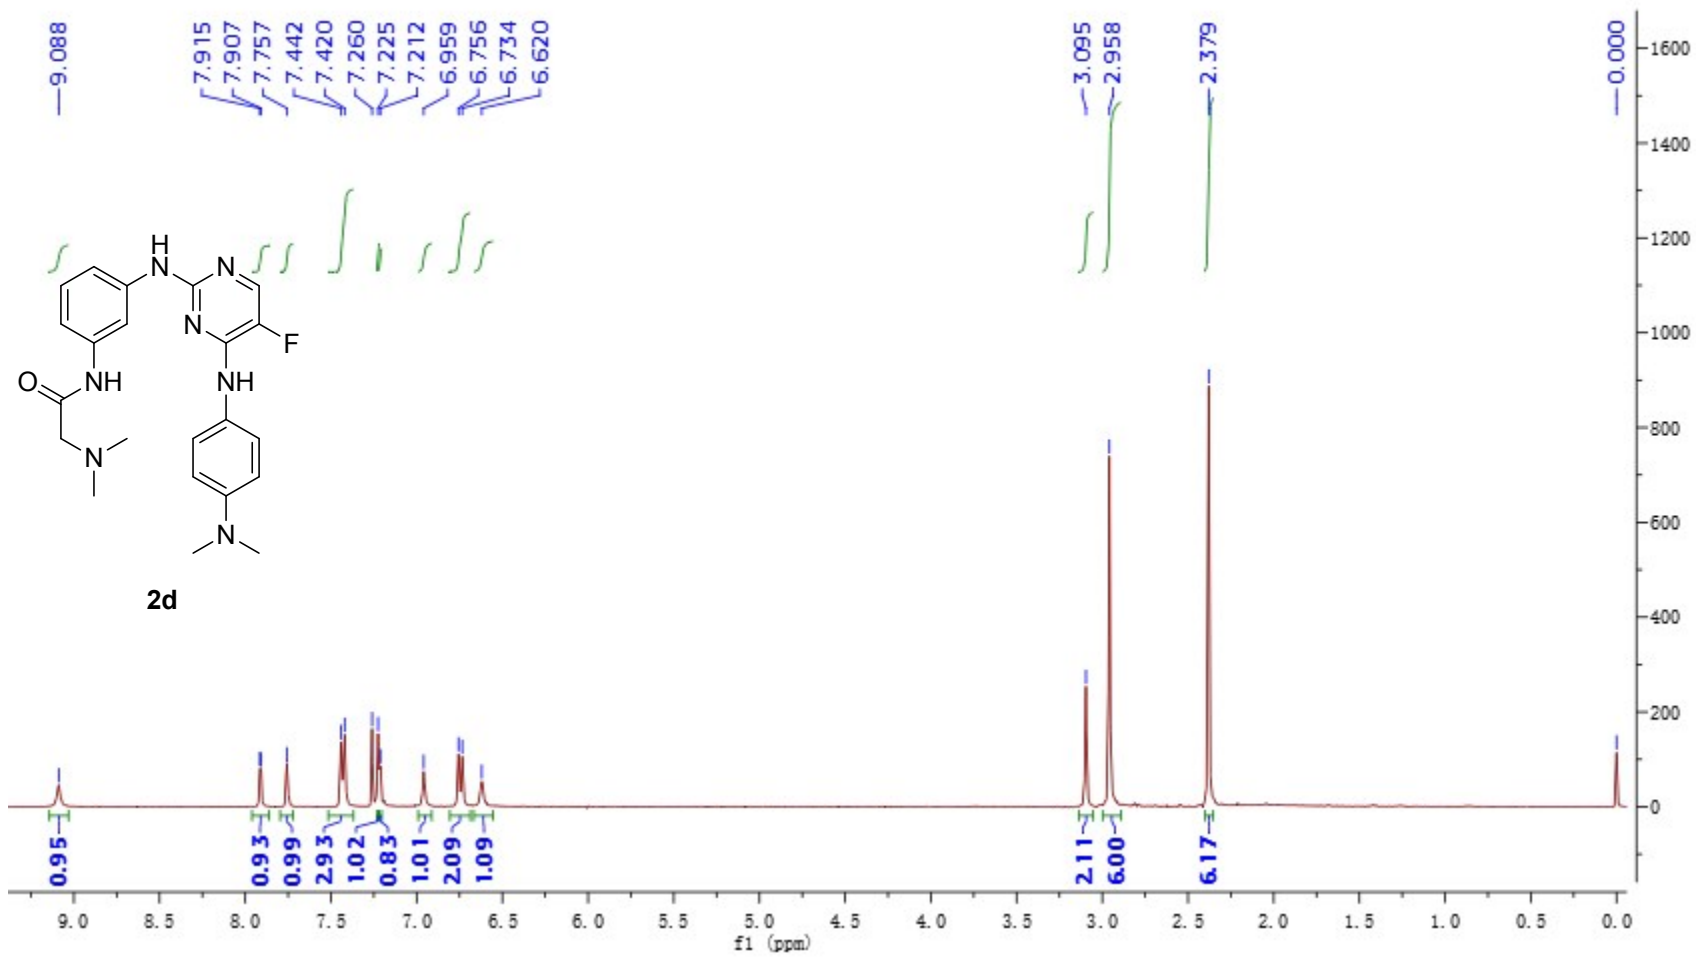

<sup>13</sup>C NMR spectrum for Compound 2d:

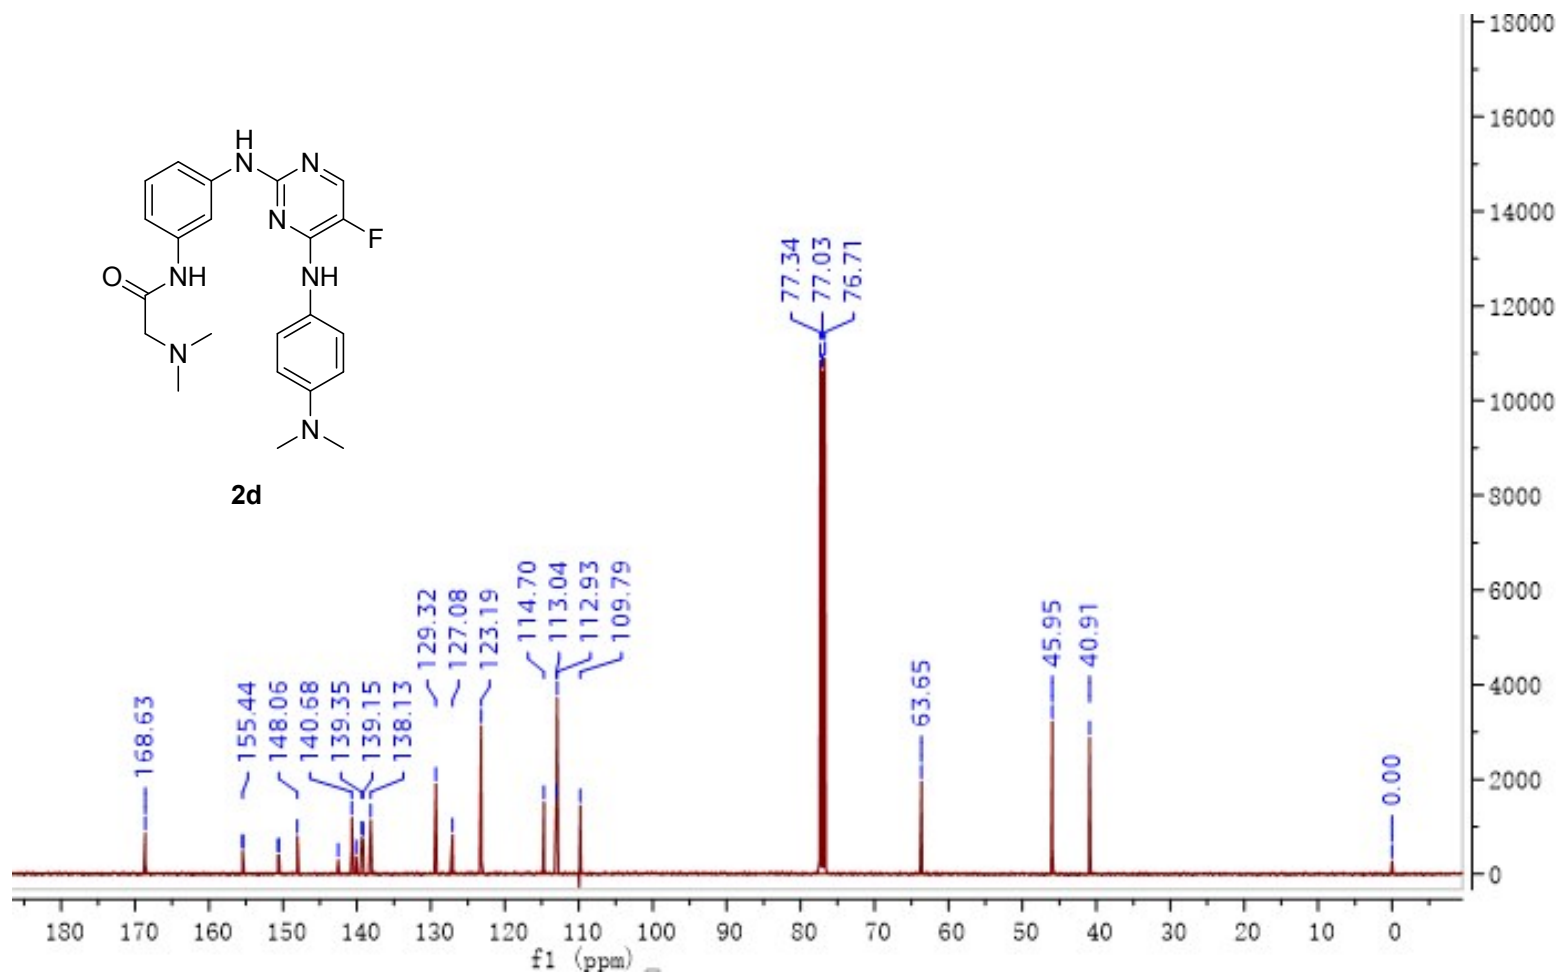

**<sup>1</sup>H NMR spectrum for Compound 2e:**

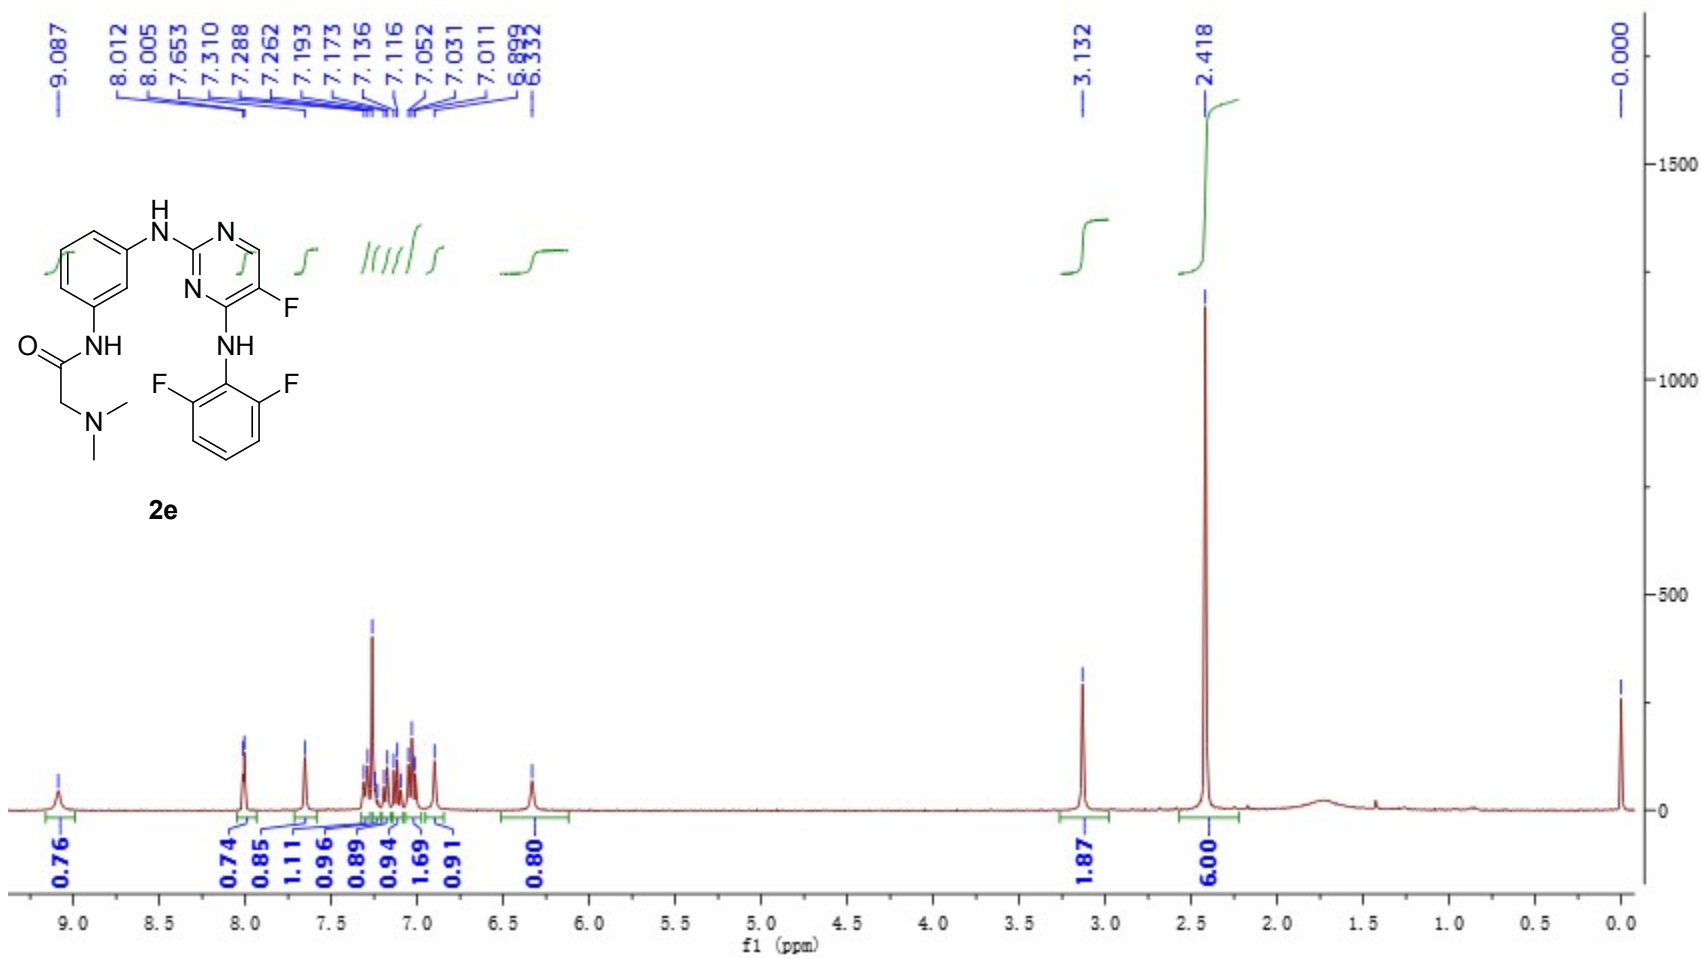

**<sup>13</sup>C NMR spectrum for Compound 2e:**

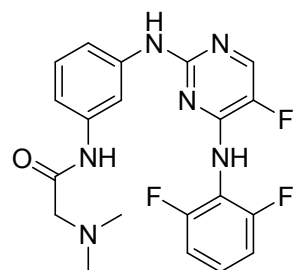

2e

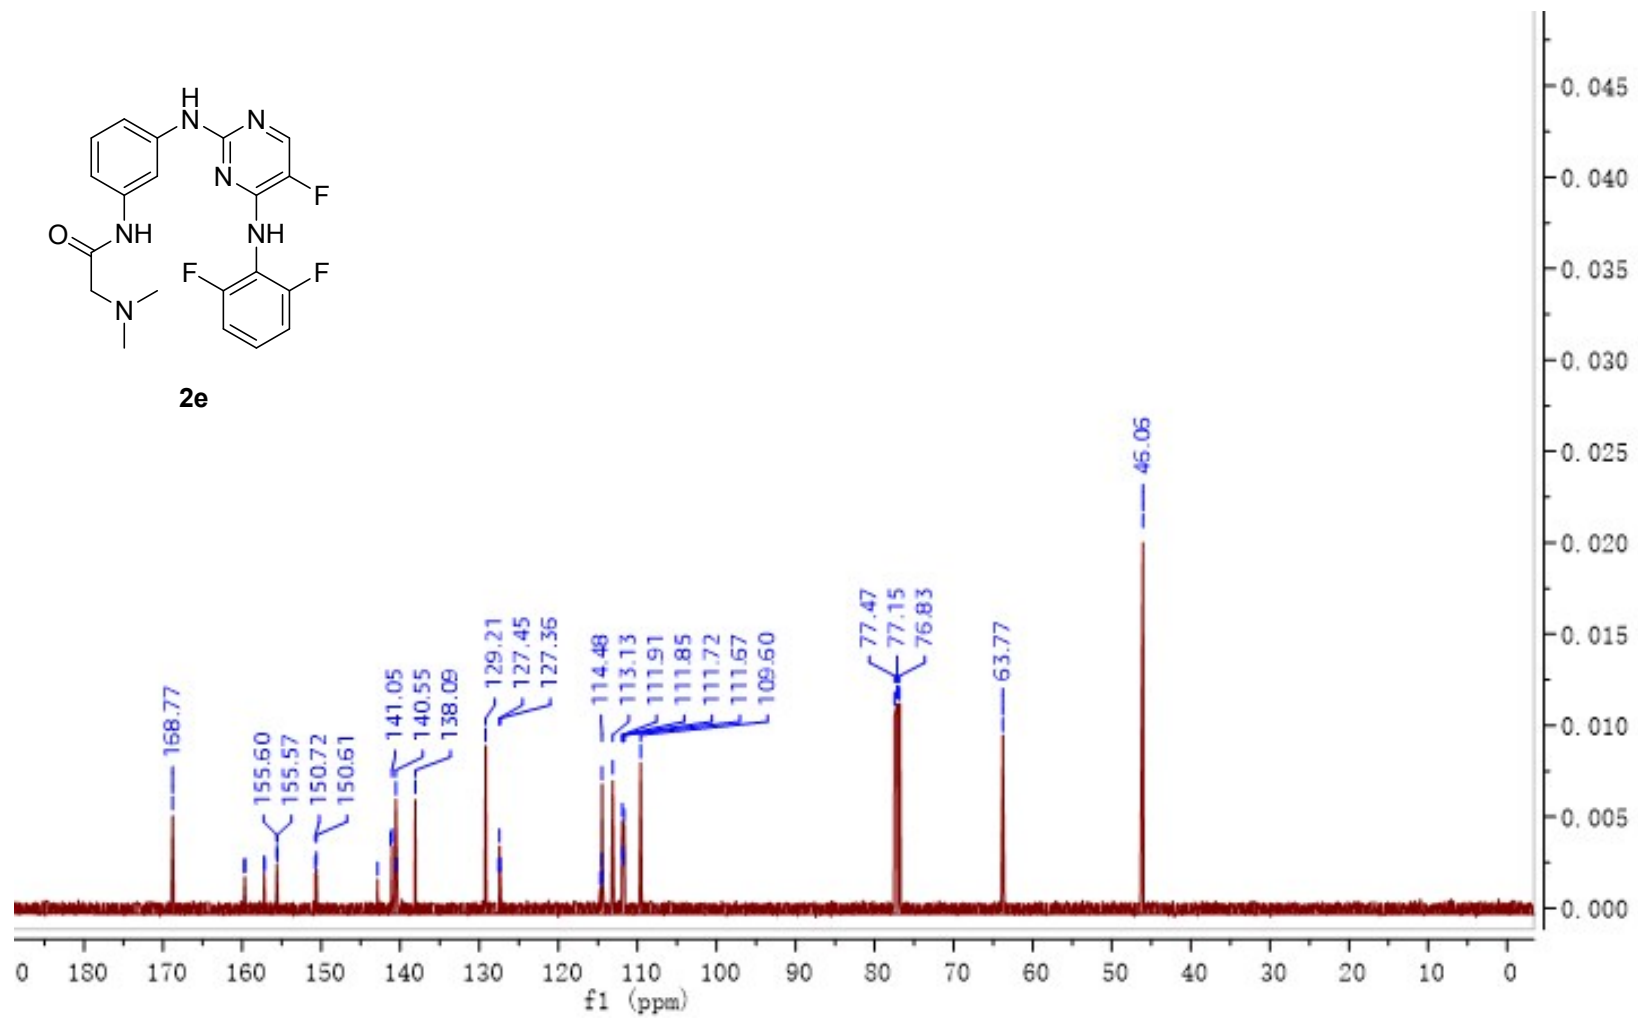

**<sup>1</sup>H NMR spectrum for Compound 2f:**

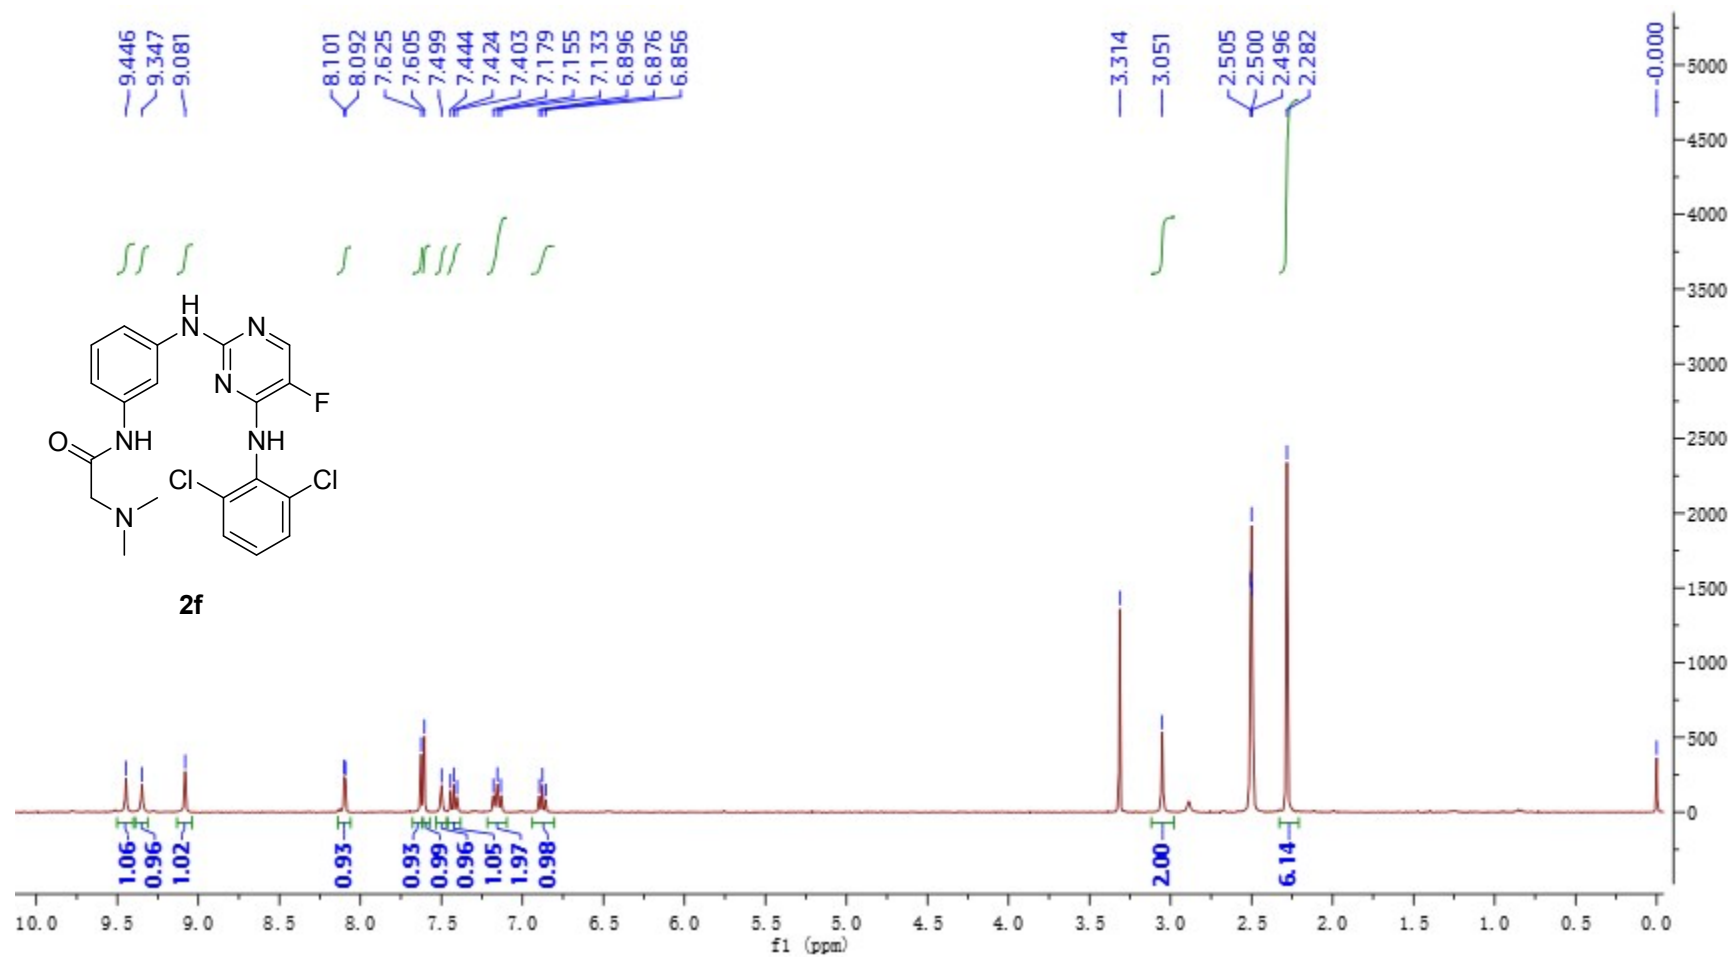



**<sup>13</sup>C NMR spectrum for Compound 2f:**

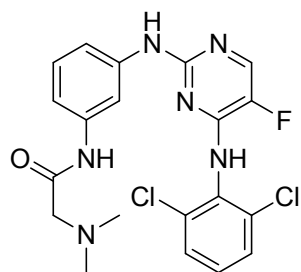

**2f**

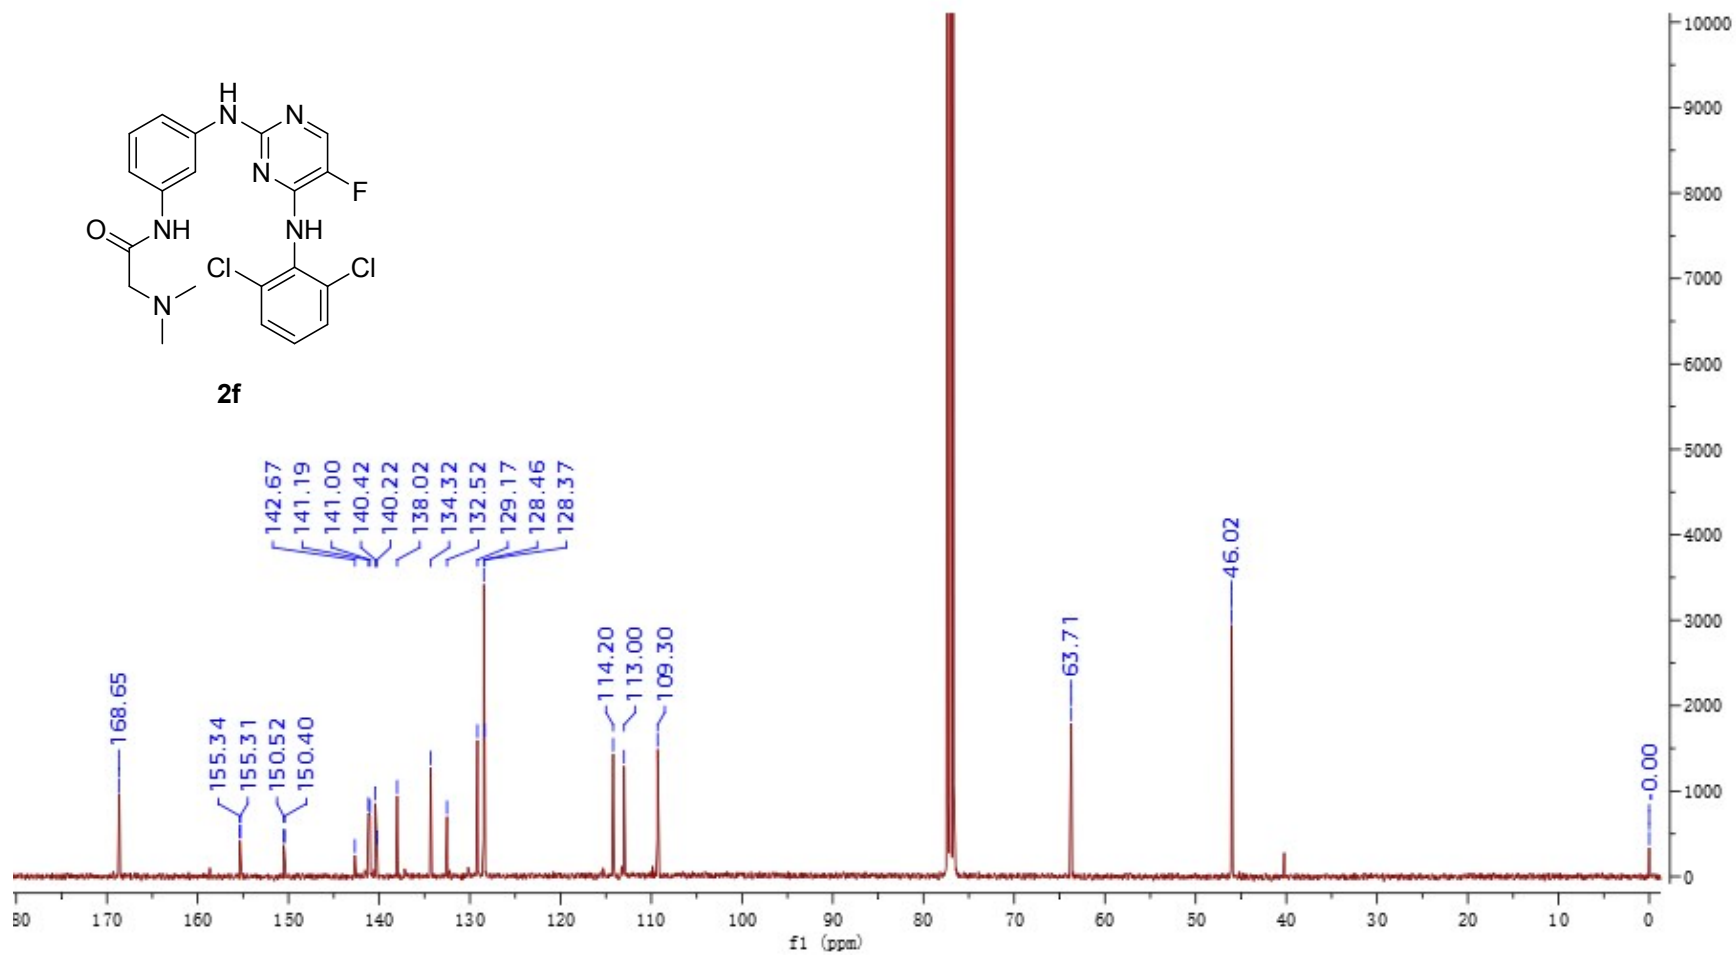

**<sup>1</sup>H NMR spectrum for Compound 2g:**

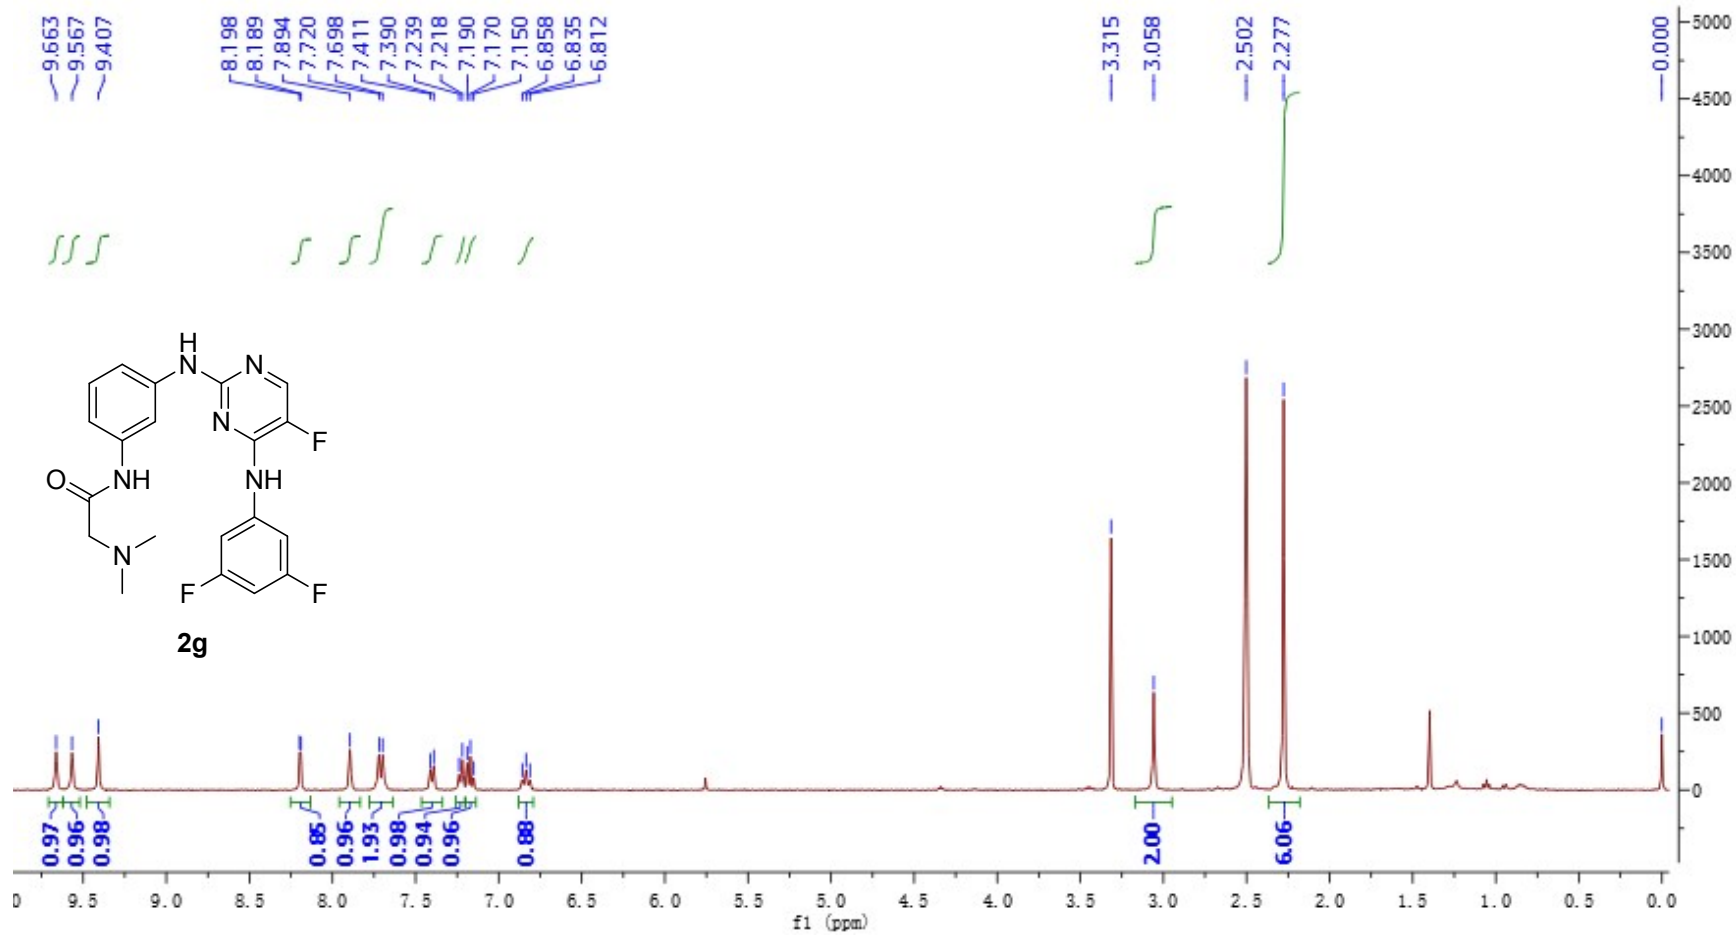

**<sup>13</sup>C NMR spectrum for Compound 2g:**

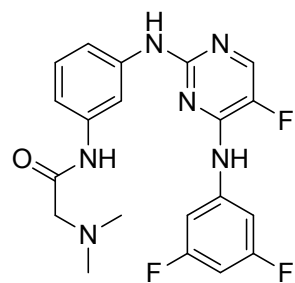

**2g**

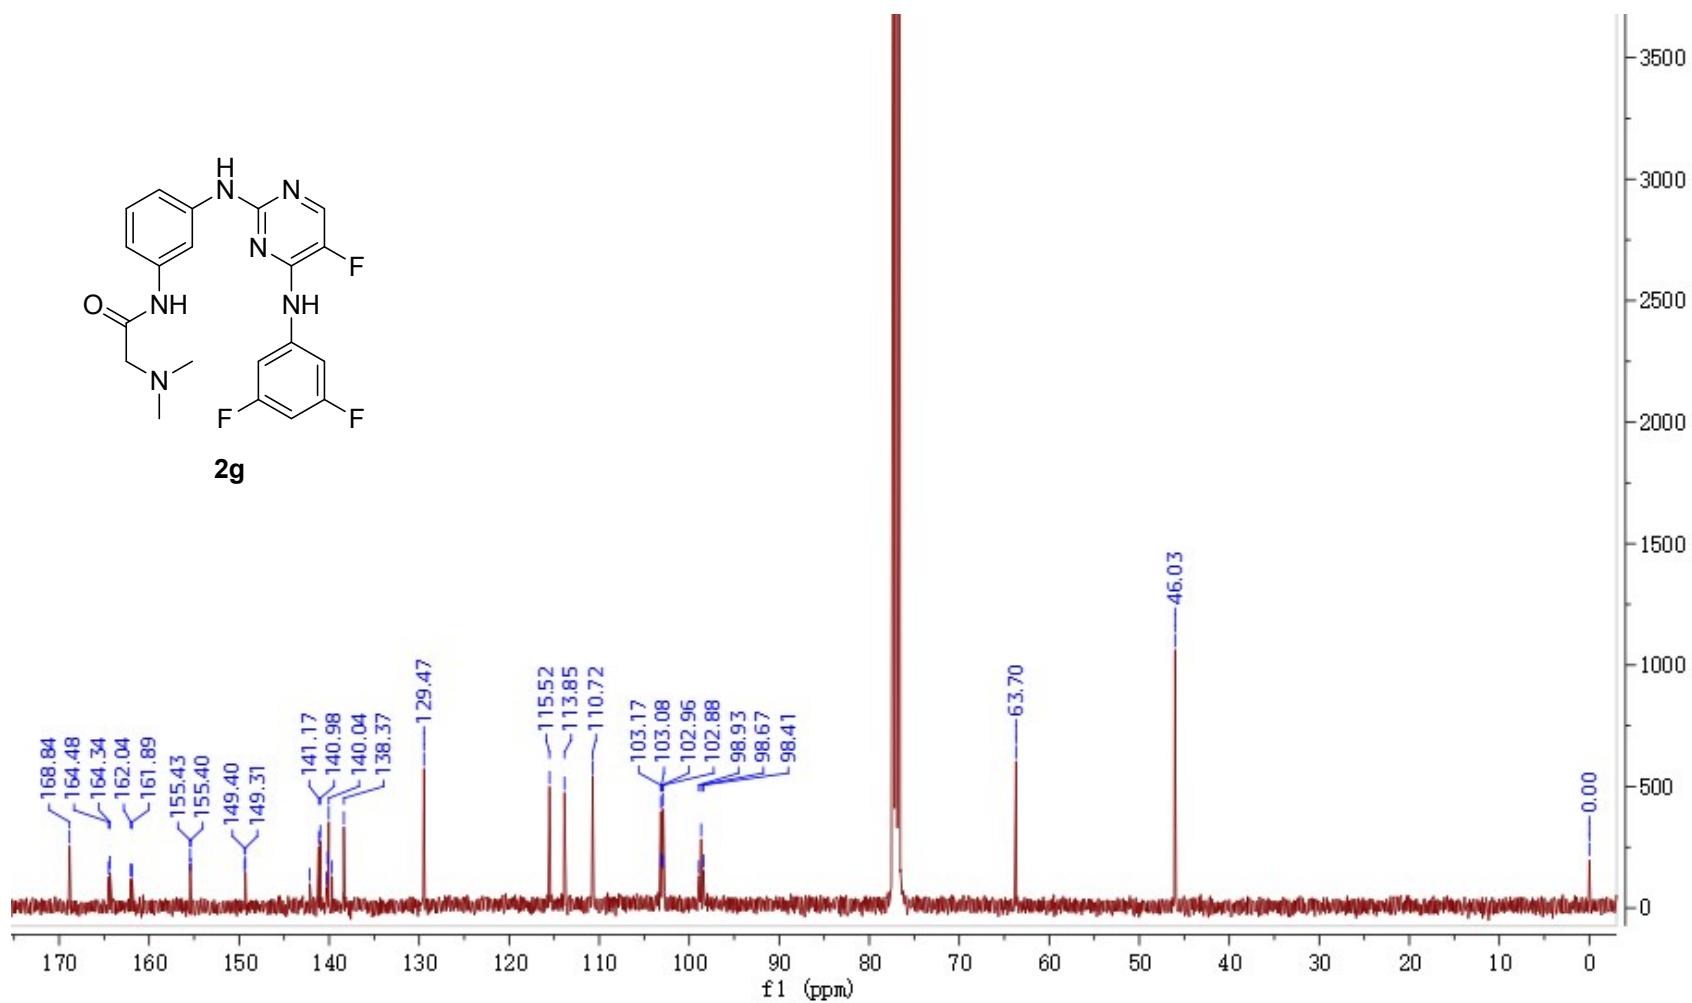

**<sup>1</sup>H NMR spectrum for Compound 2h:**

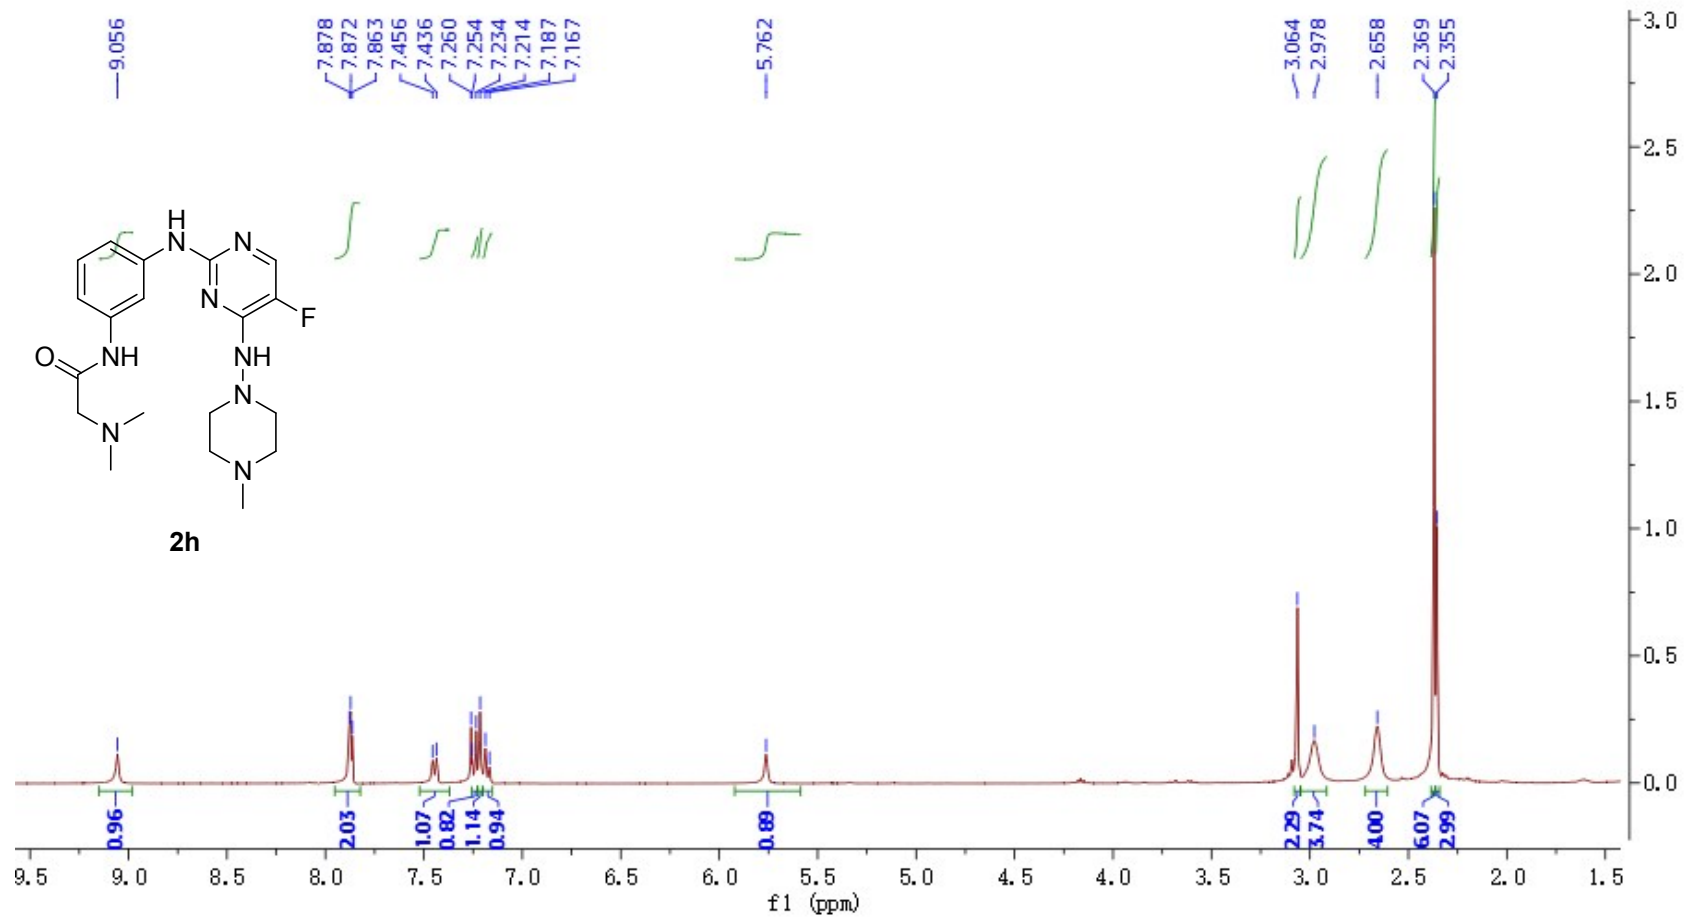

**<sup>13</sup>C NMR spectrum for Compound 2h:**

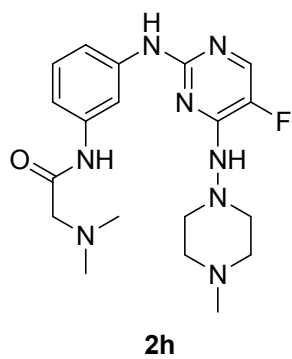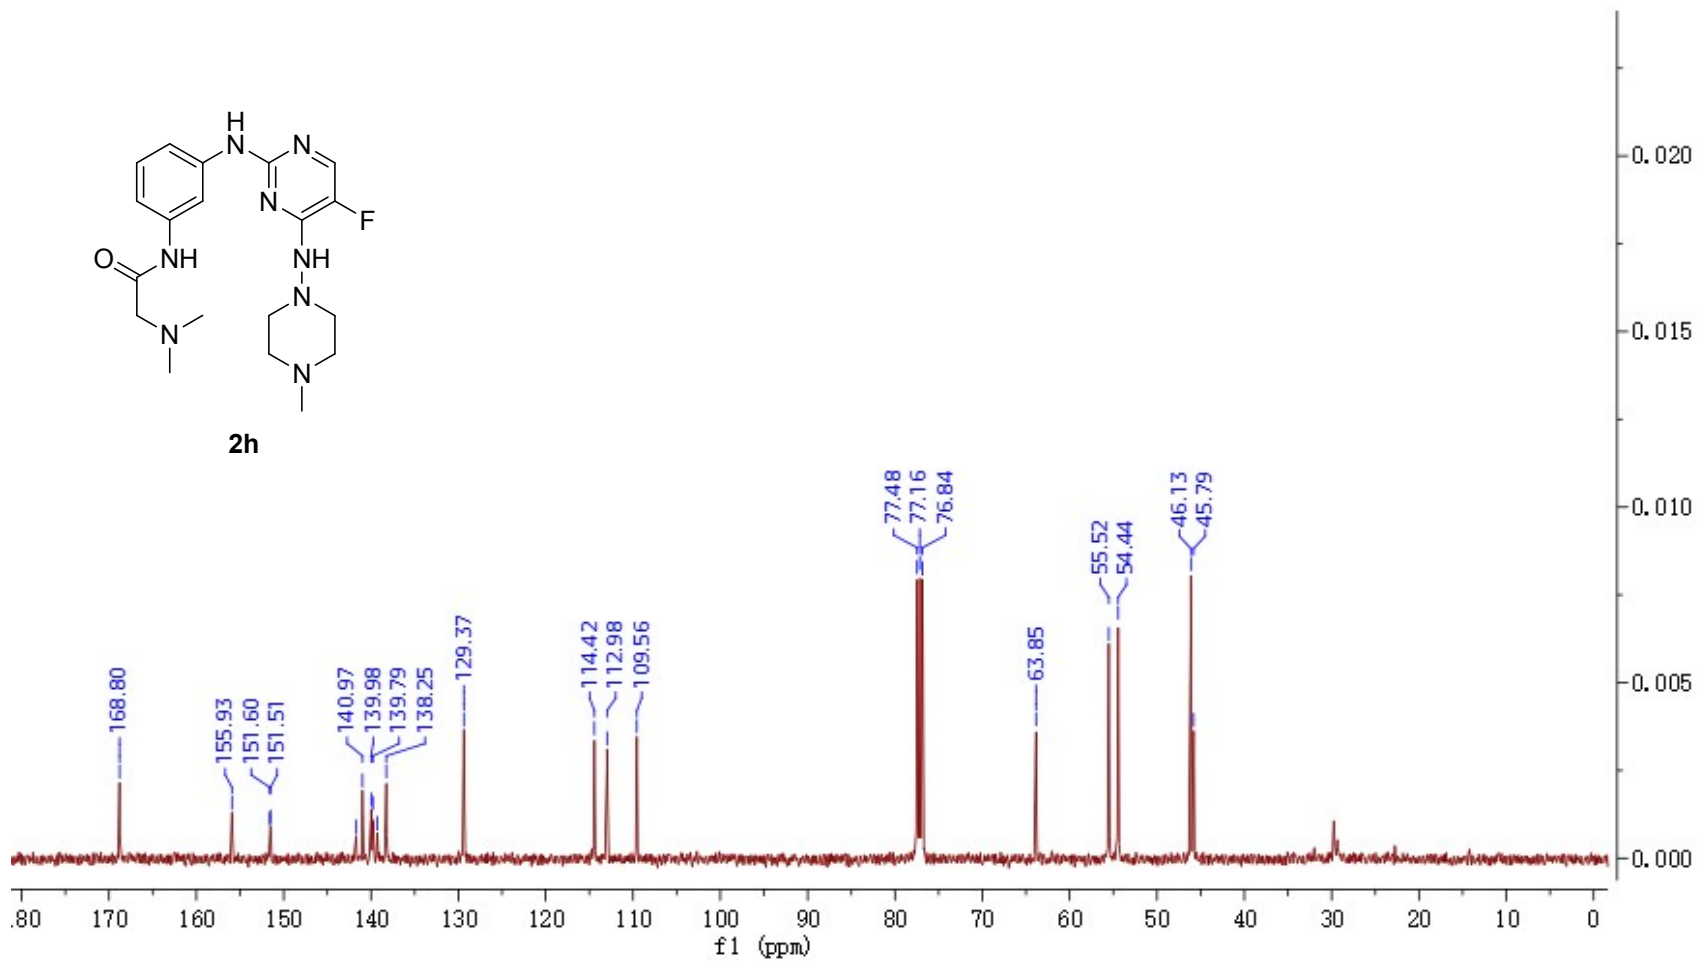

**<sup>1</sup>H NMR spectrum for Compound 2i:**

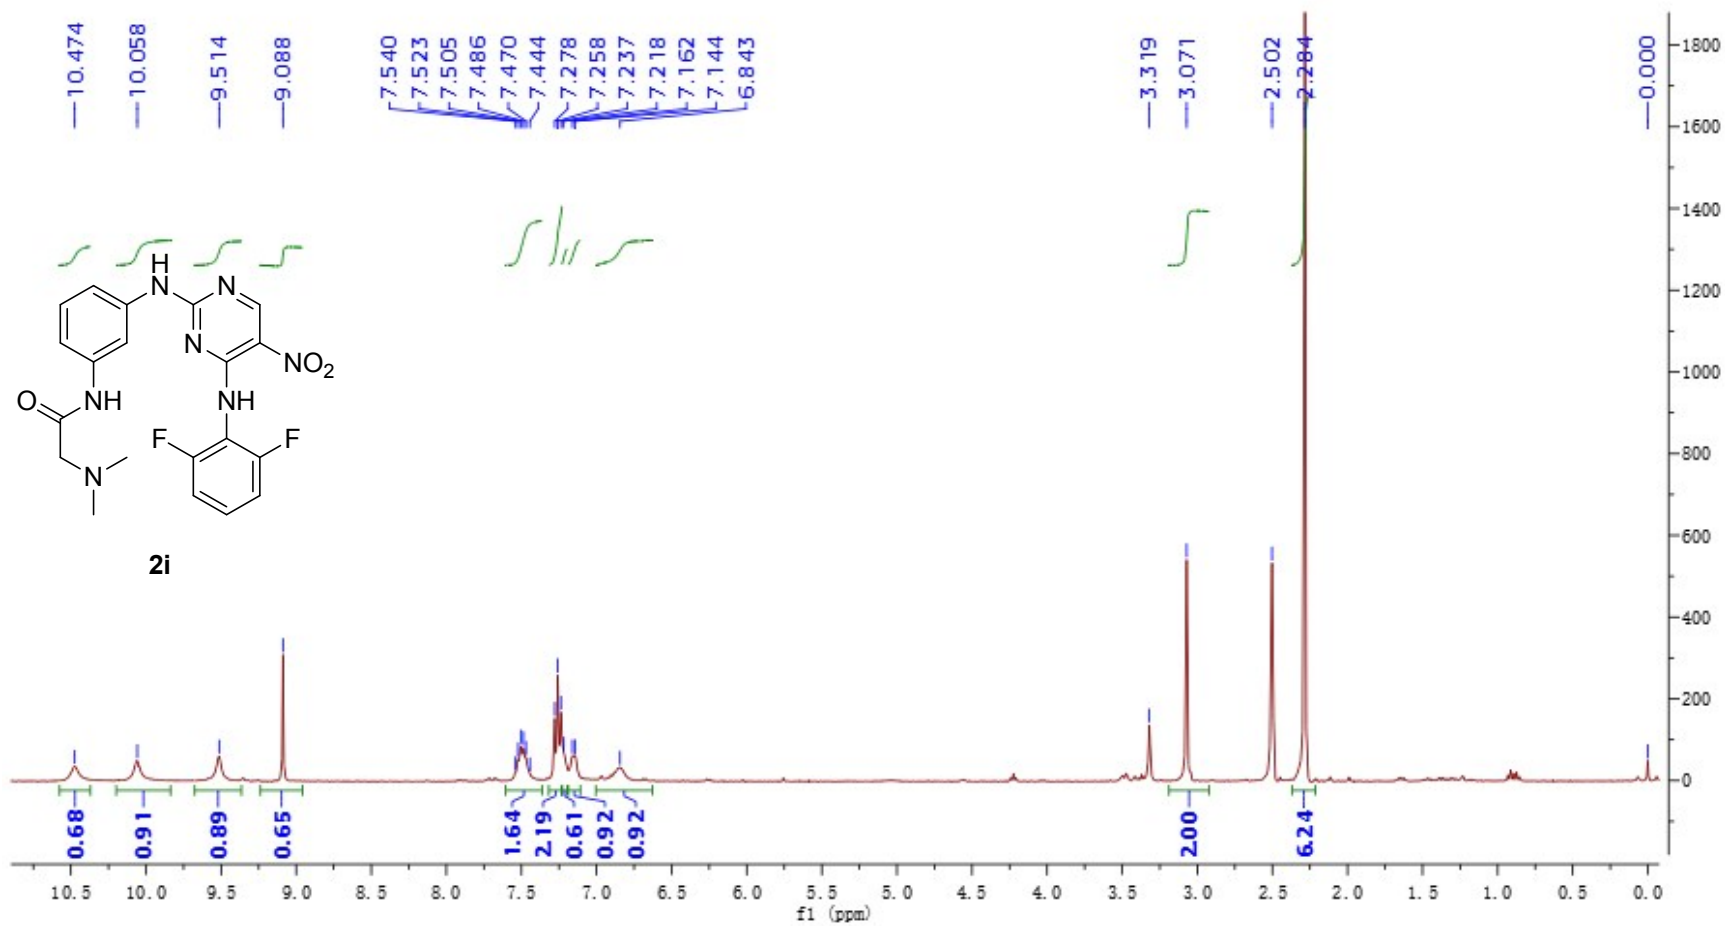

**<sup>13</sup>C NMR spectrum for Compound 2i:**

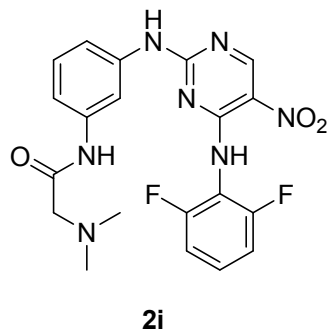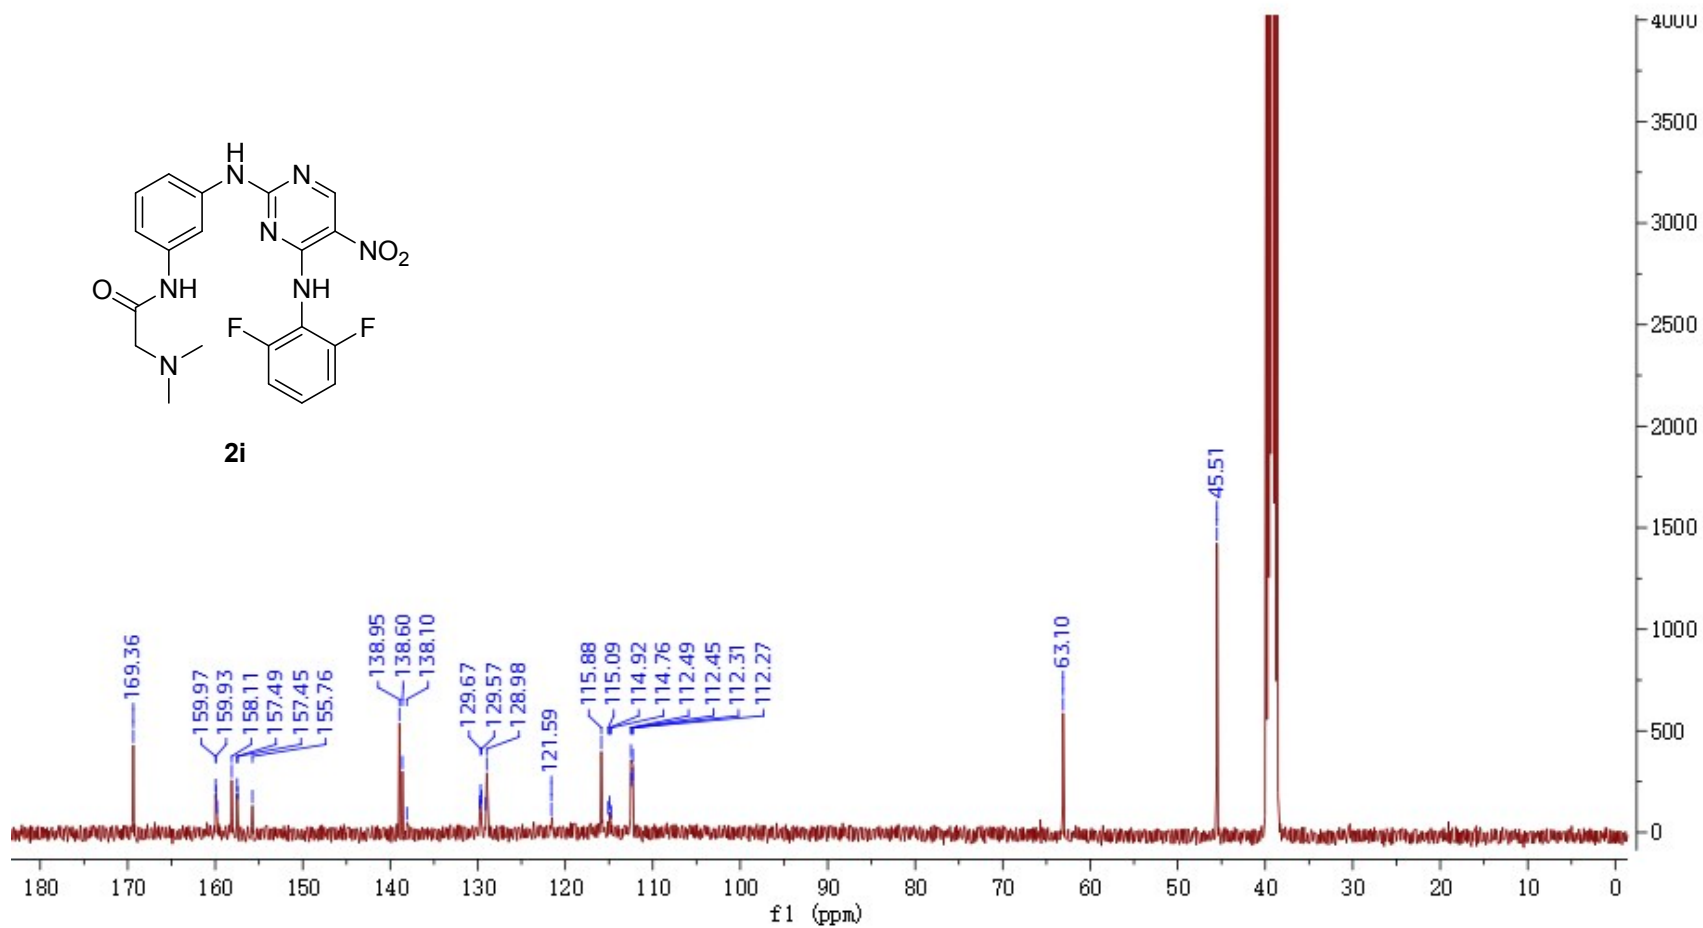

**<sup>1</sup>H NMR spectrum for Compound 3a:**

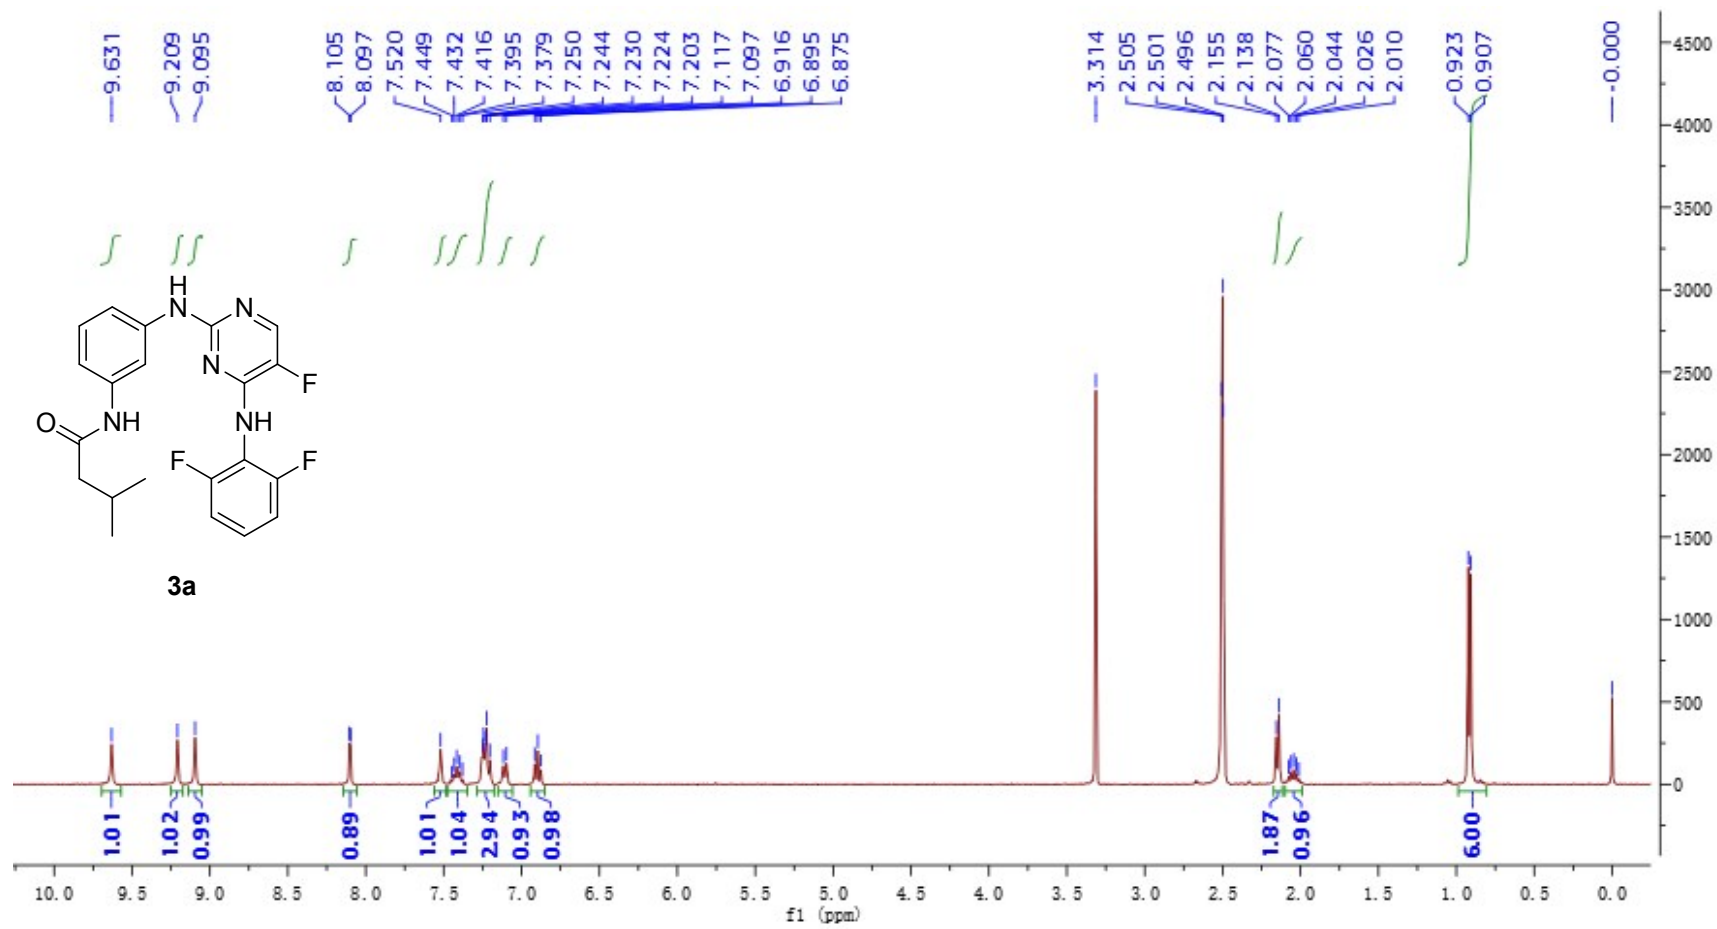



**<sup>13</sup>C NMR spectrum for Compound 3a:**

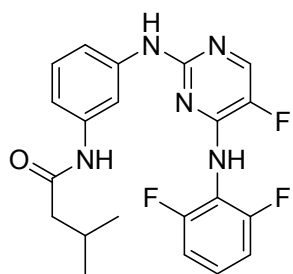

**3a**

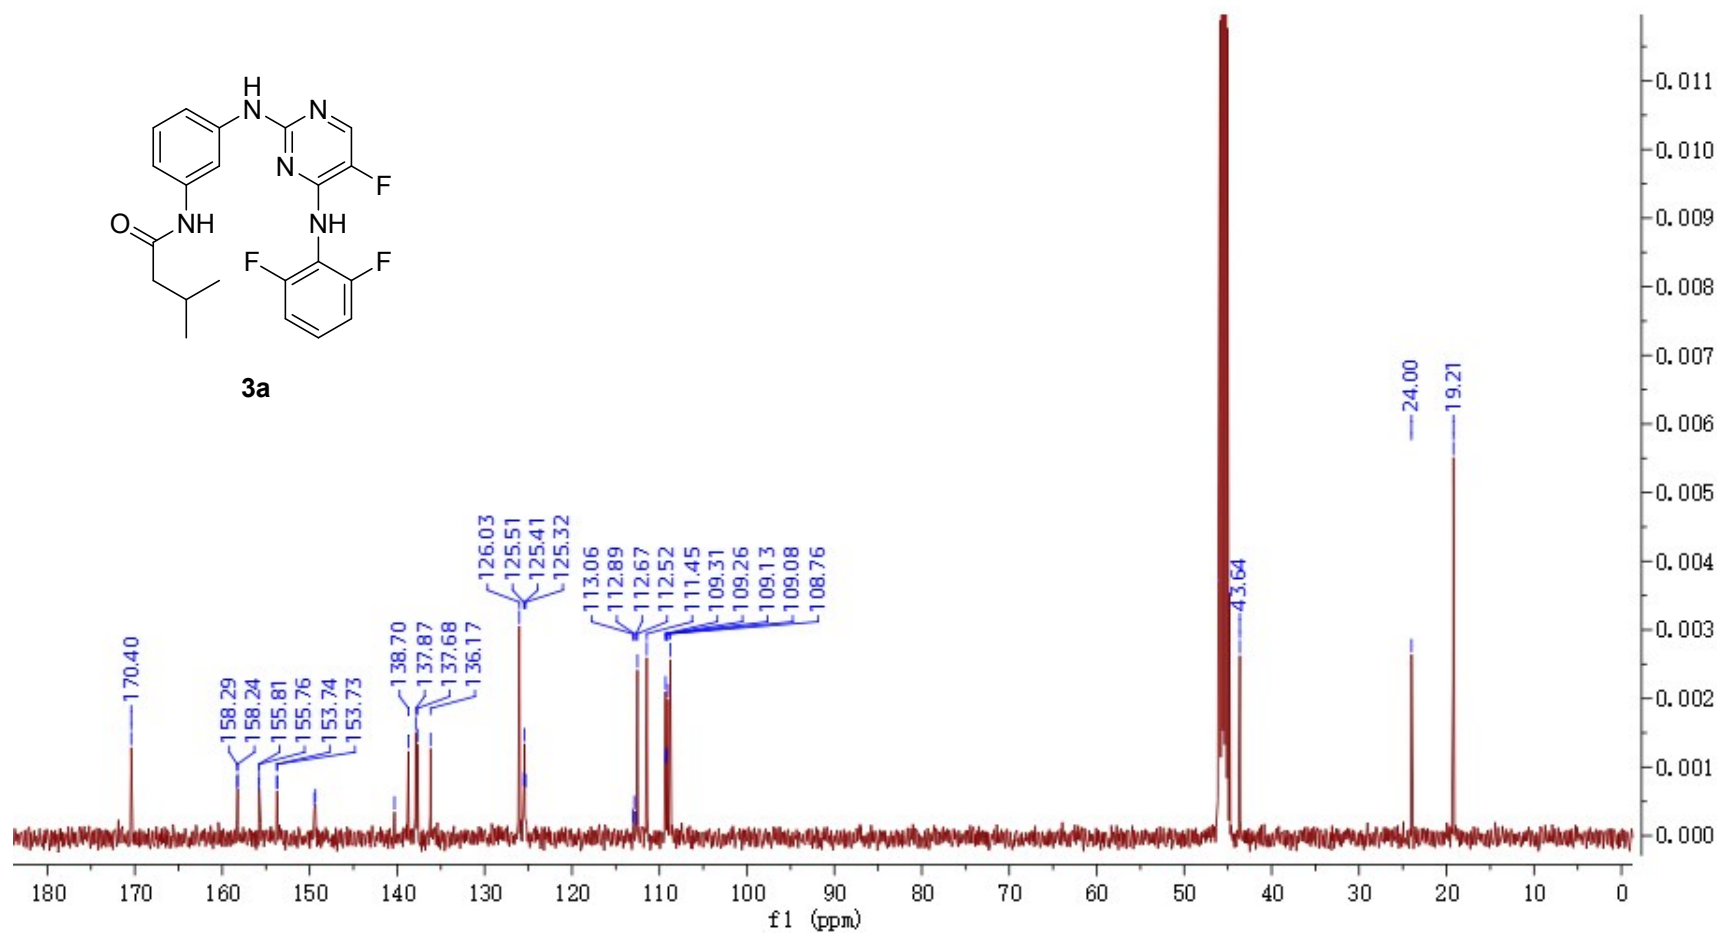

**<sup>1</sup>H NMR spectrum for Compound 3b:**

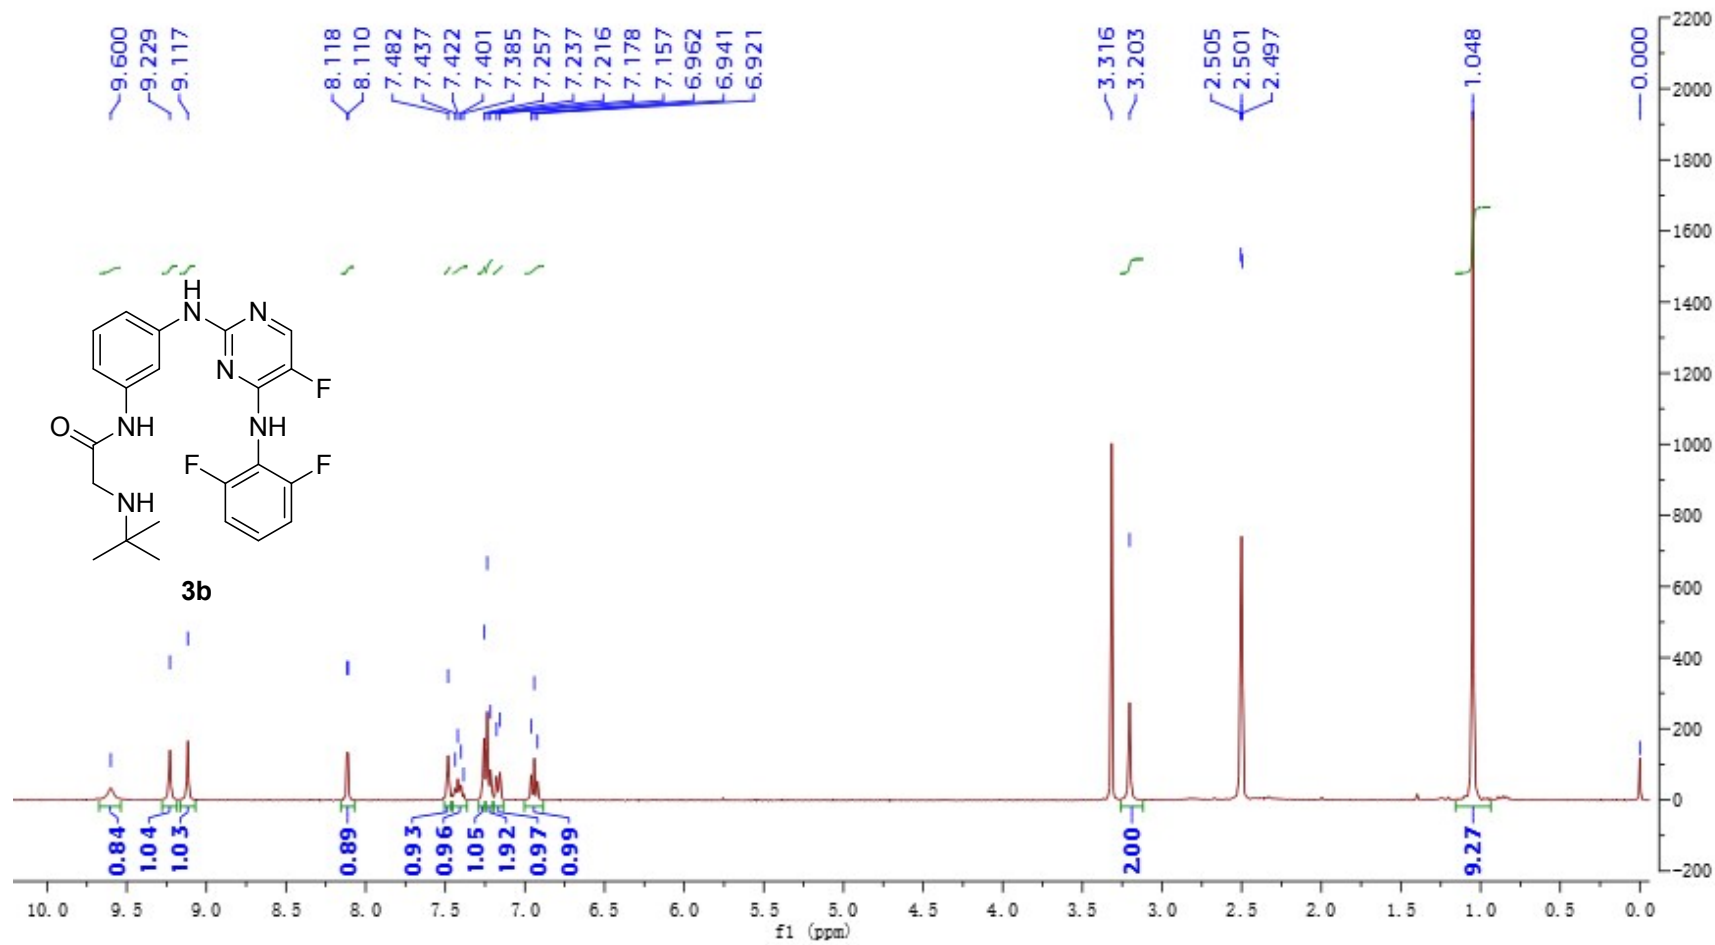

**<sup>13</sup>C NMR spectrum for Compound 3b:**

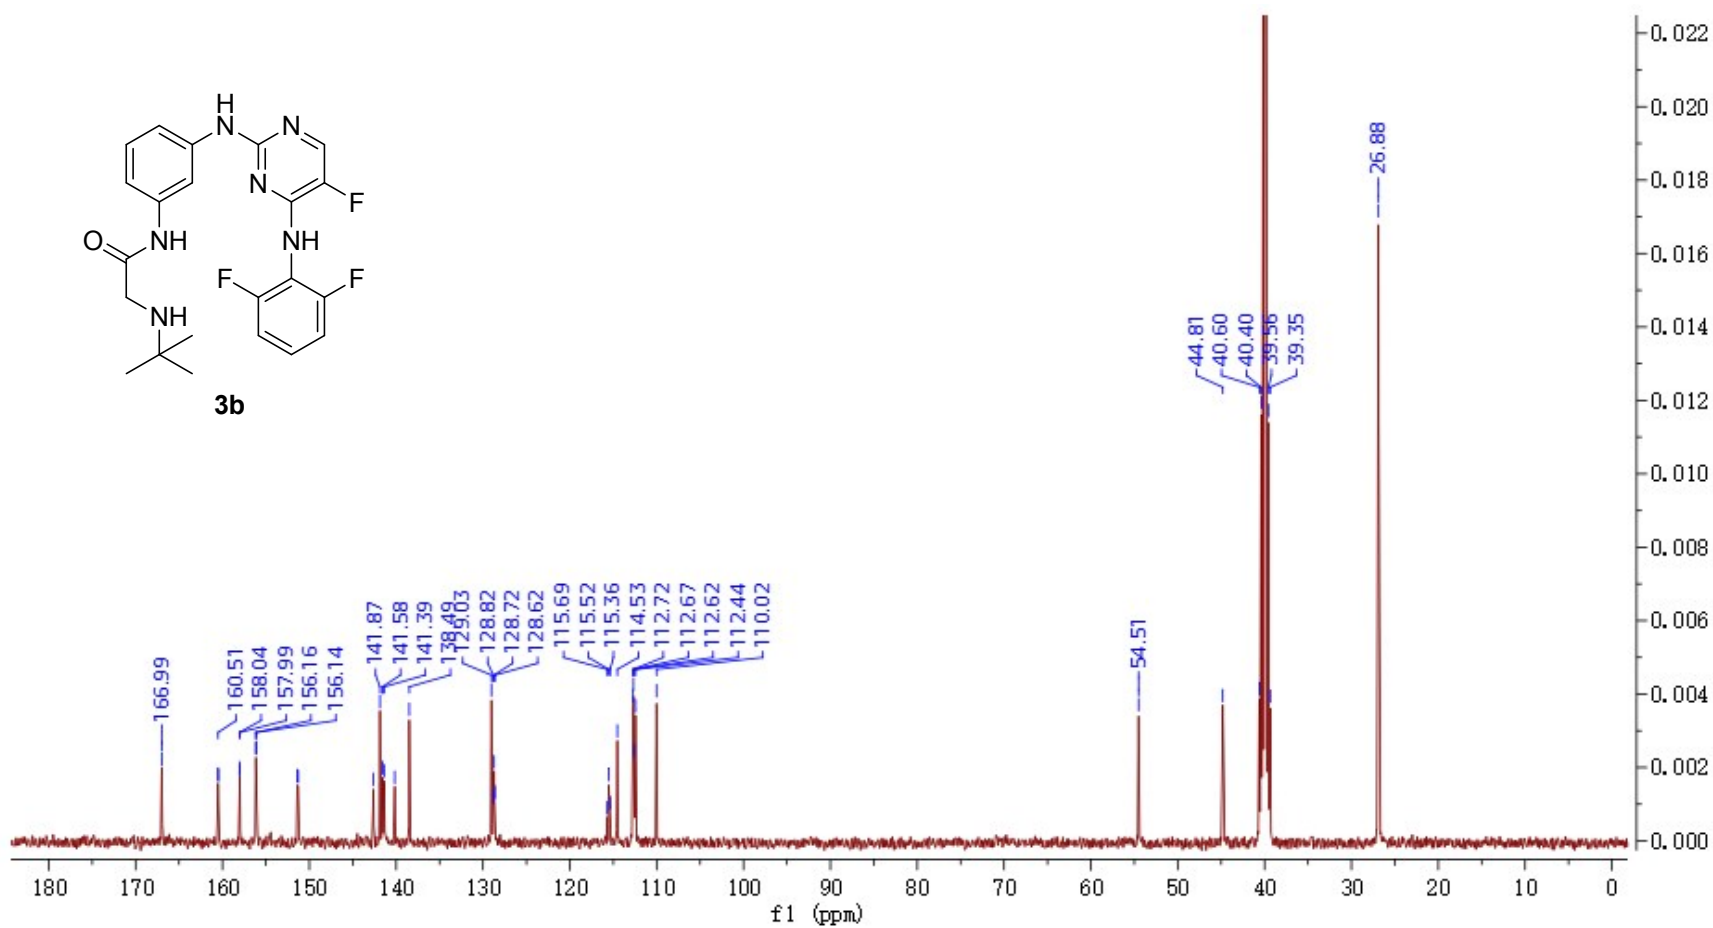

**<sup>1</sup>H NMR spectrum for Compound 3c:**

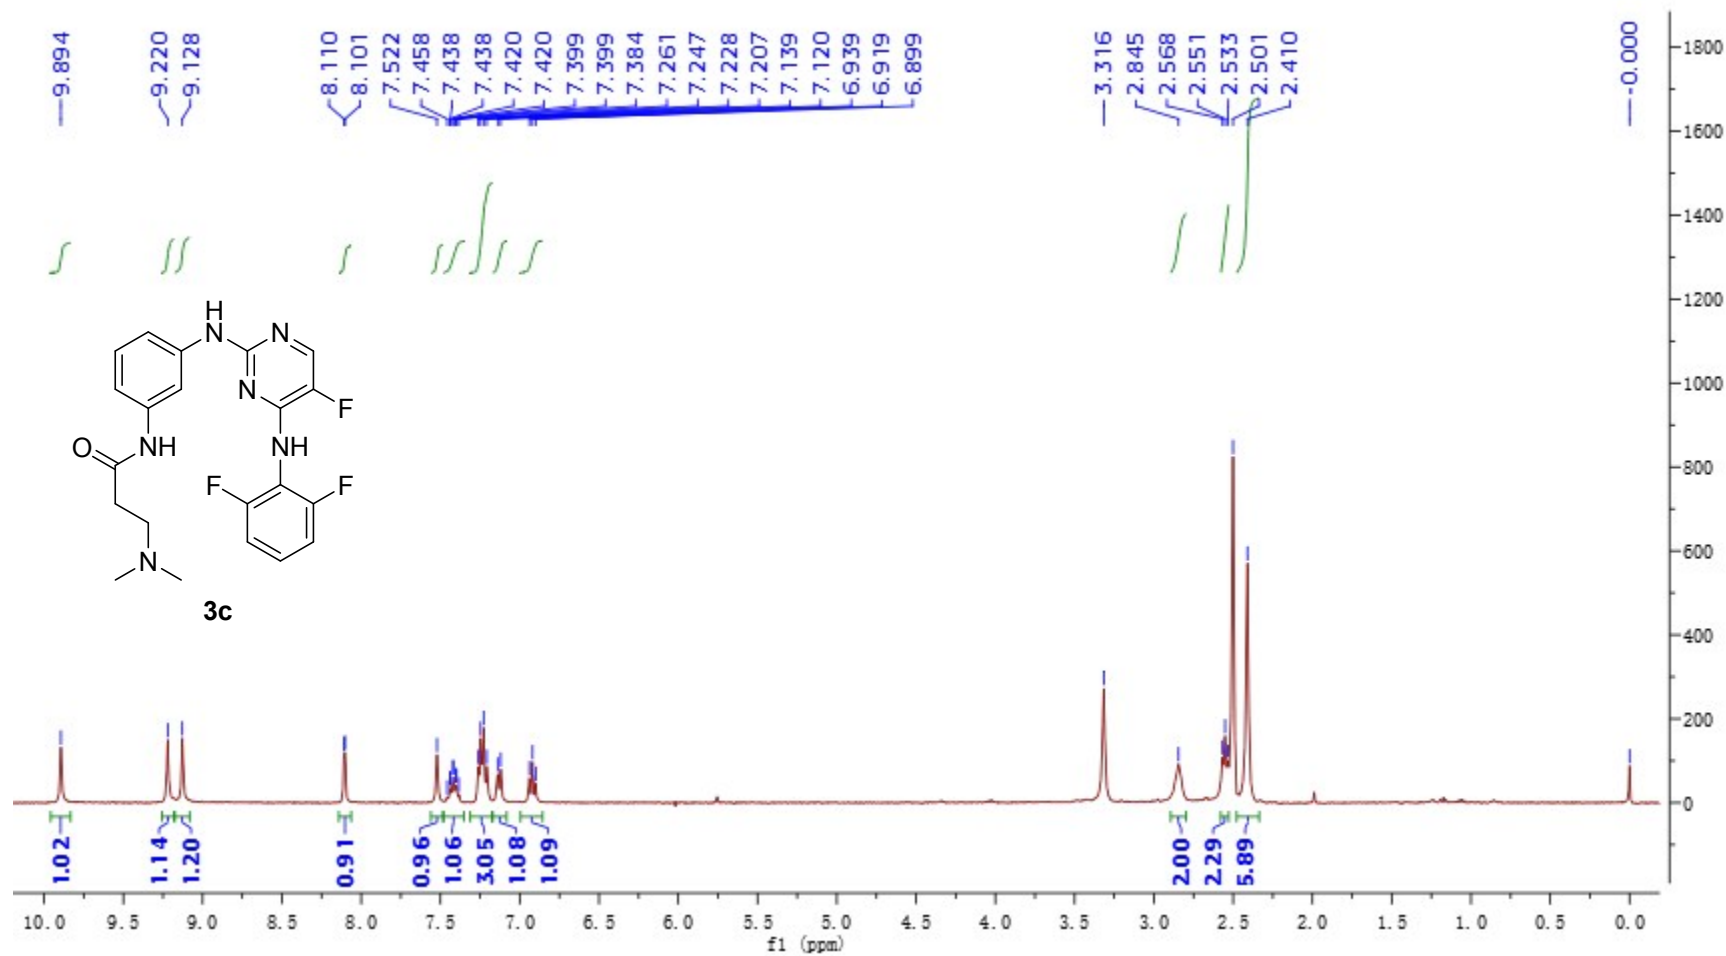

**<sup>13</sup>C NMR spectrum for Compound 3c:**

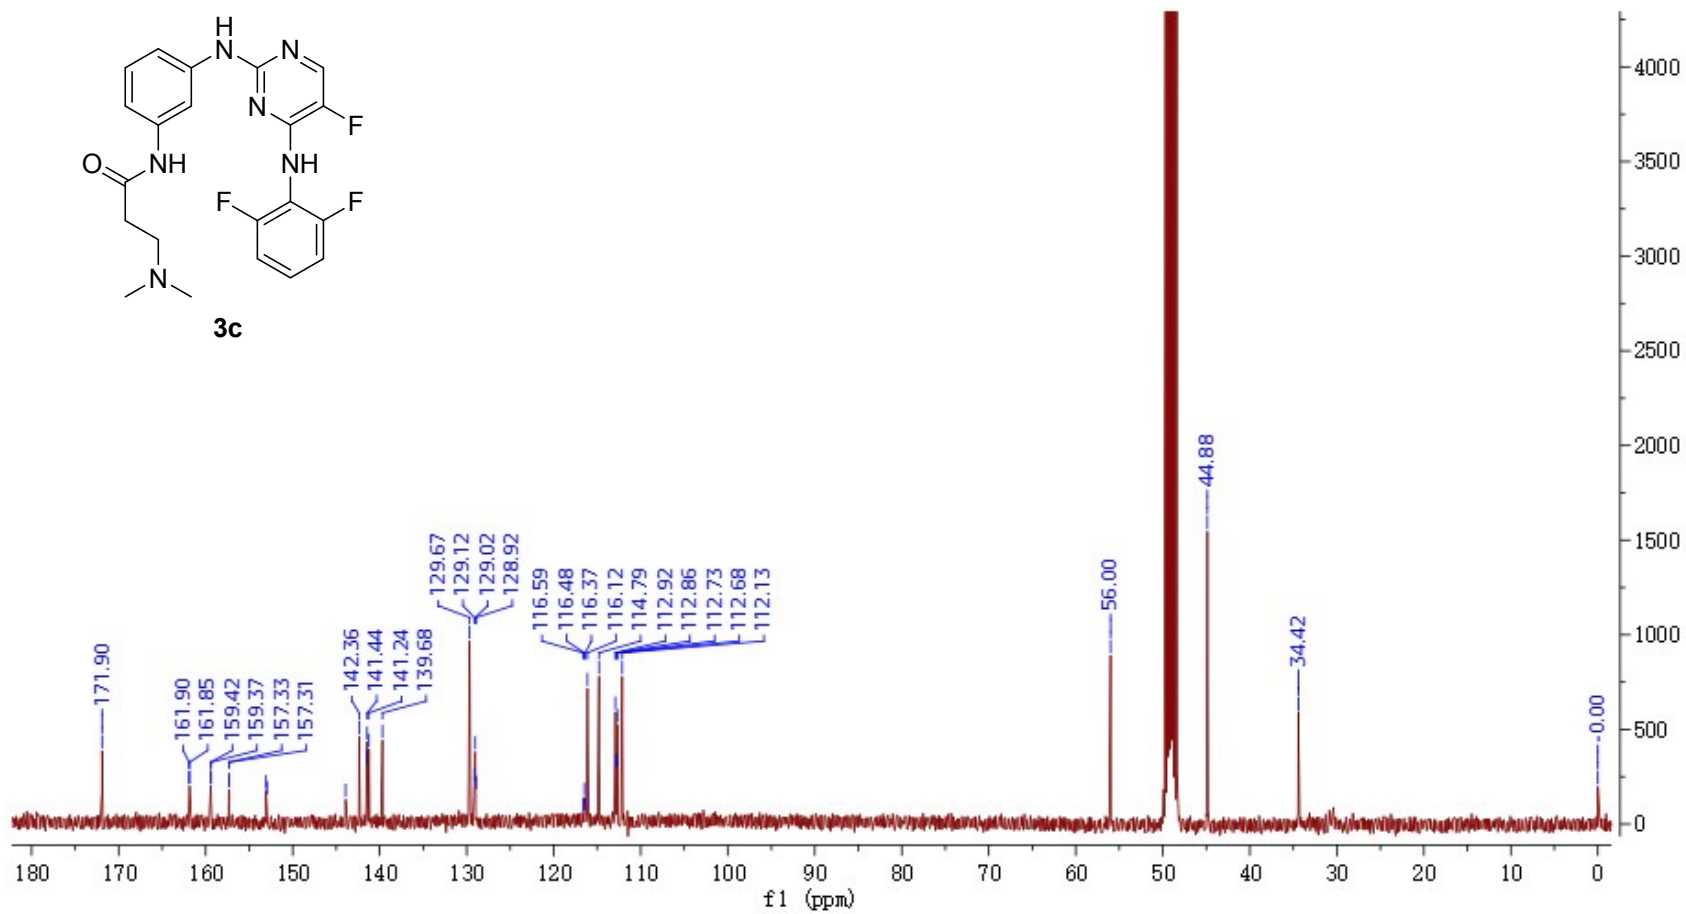

**<sup>1</sup>H NMR spectrum for Compound 3d:**

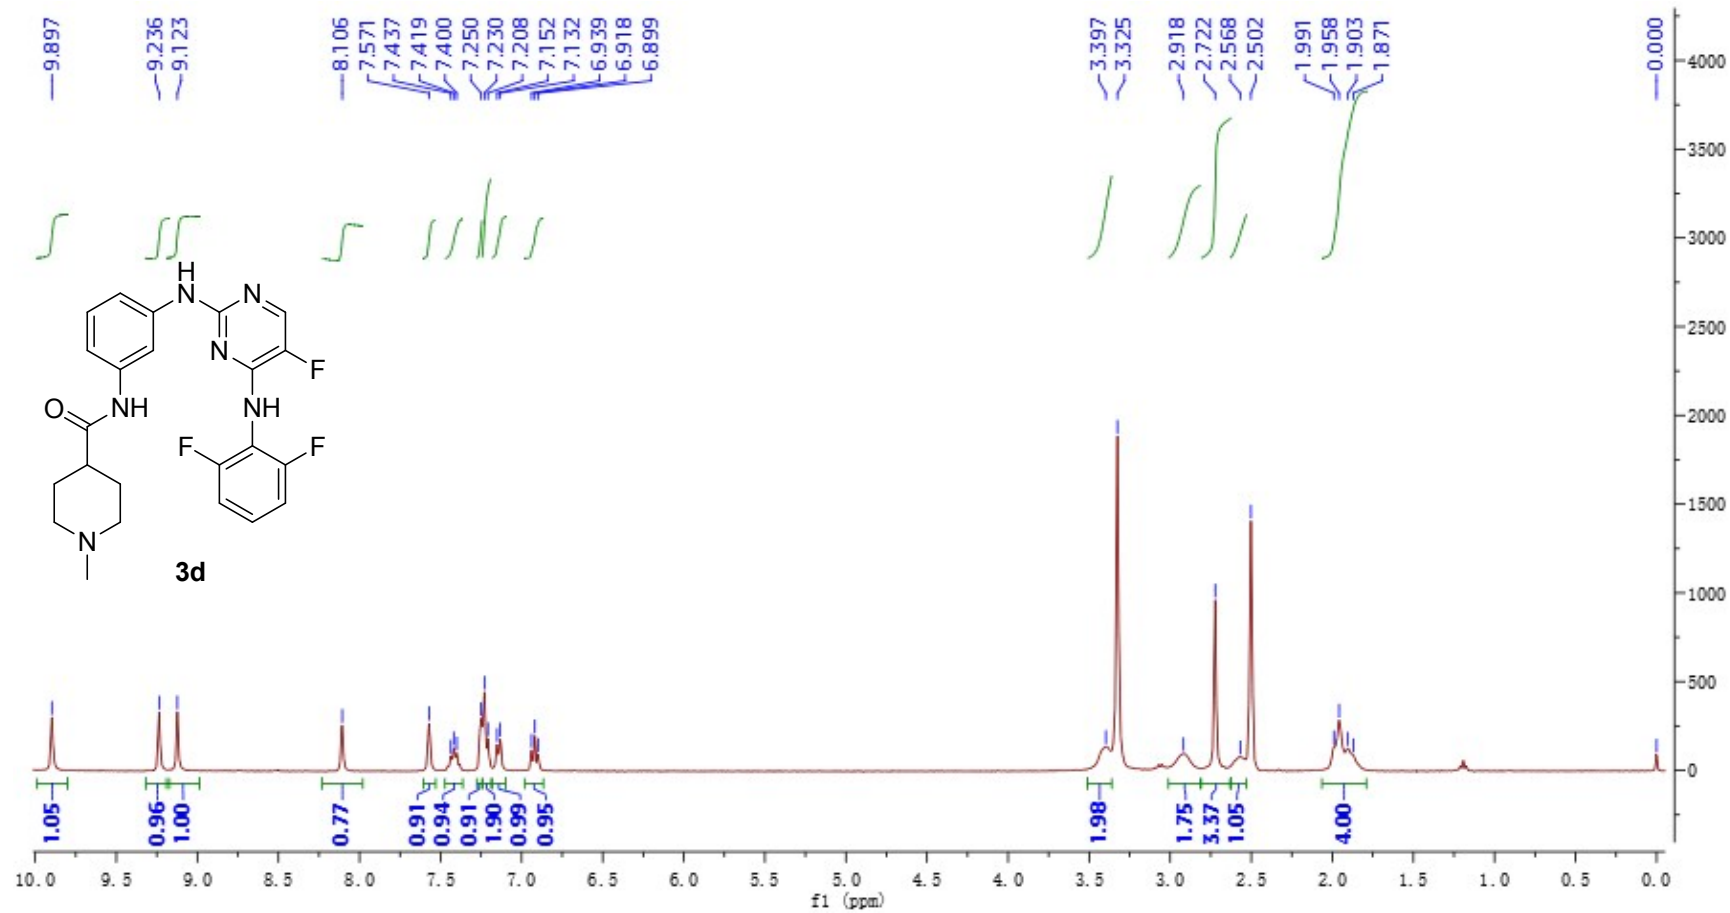

<sup>13</sup>C NMR spectrum for Compound 3d:

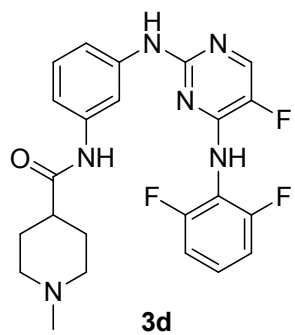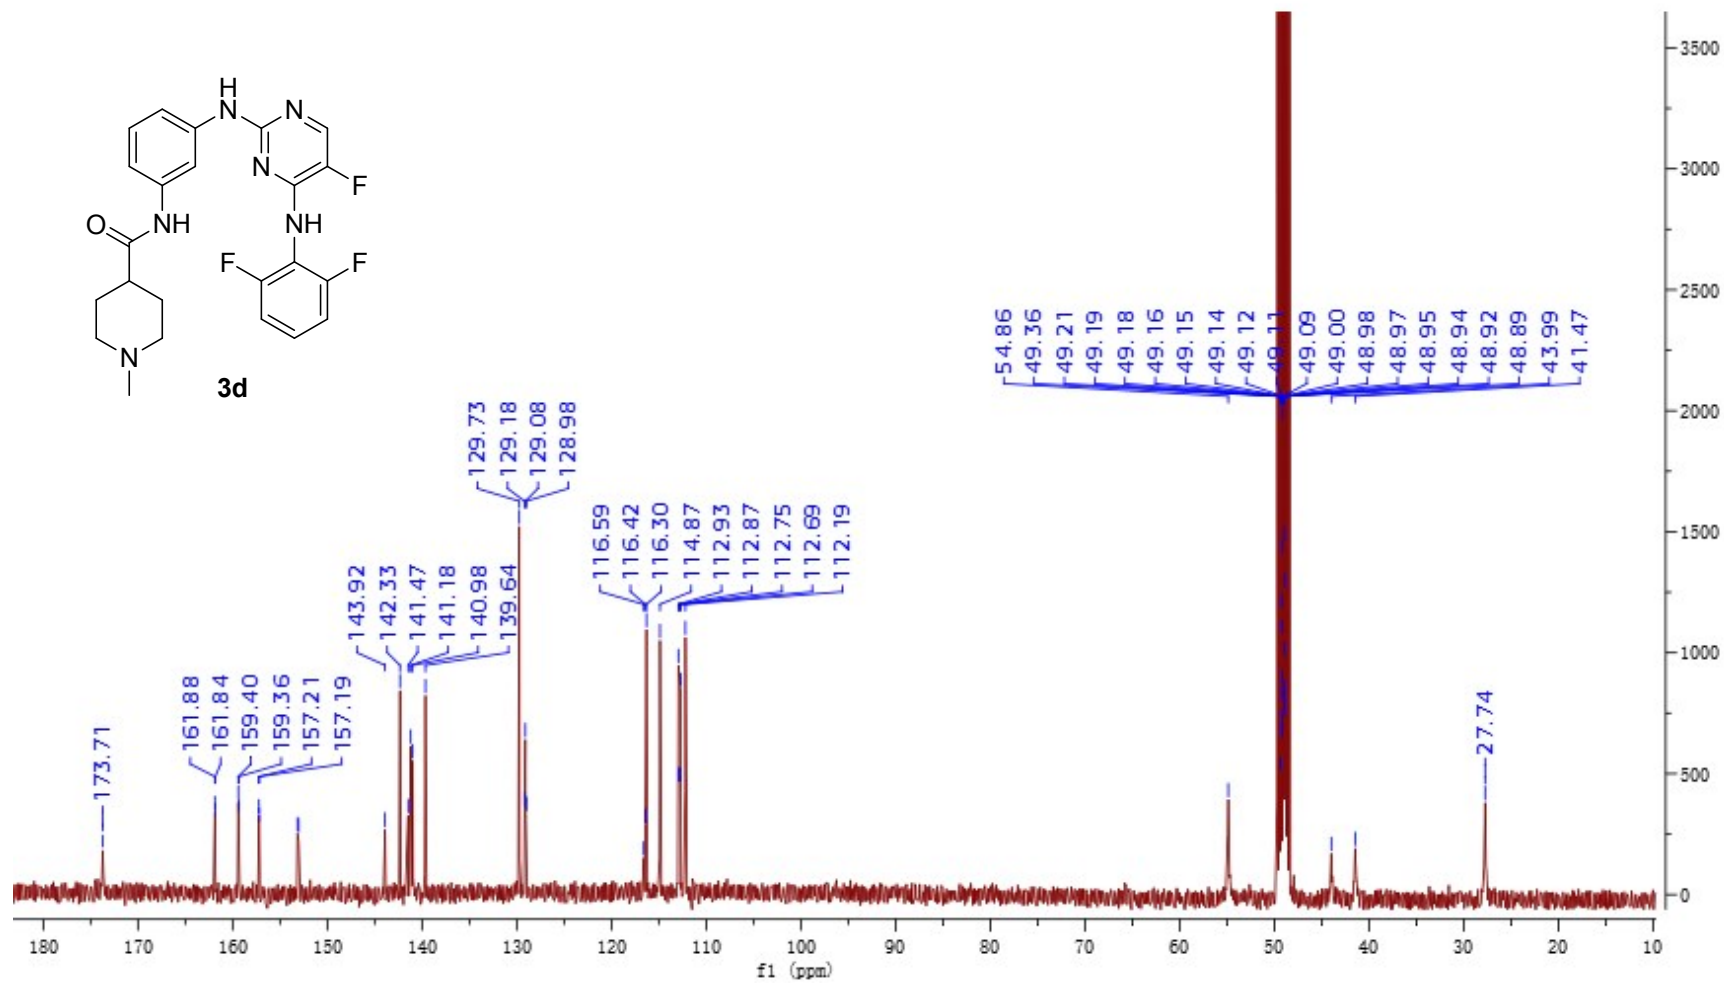

**<sup>1</sup>H NMR spectrum for Compound 3e:**

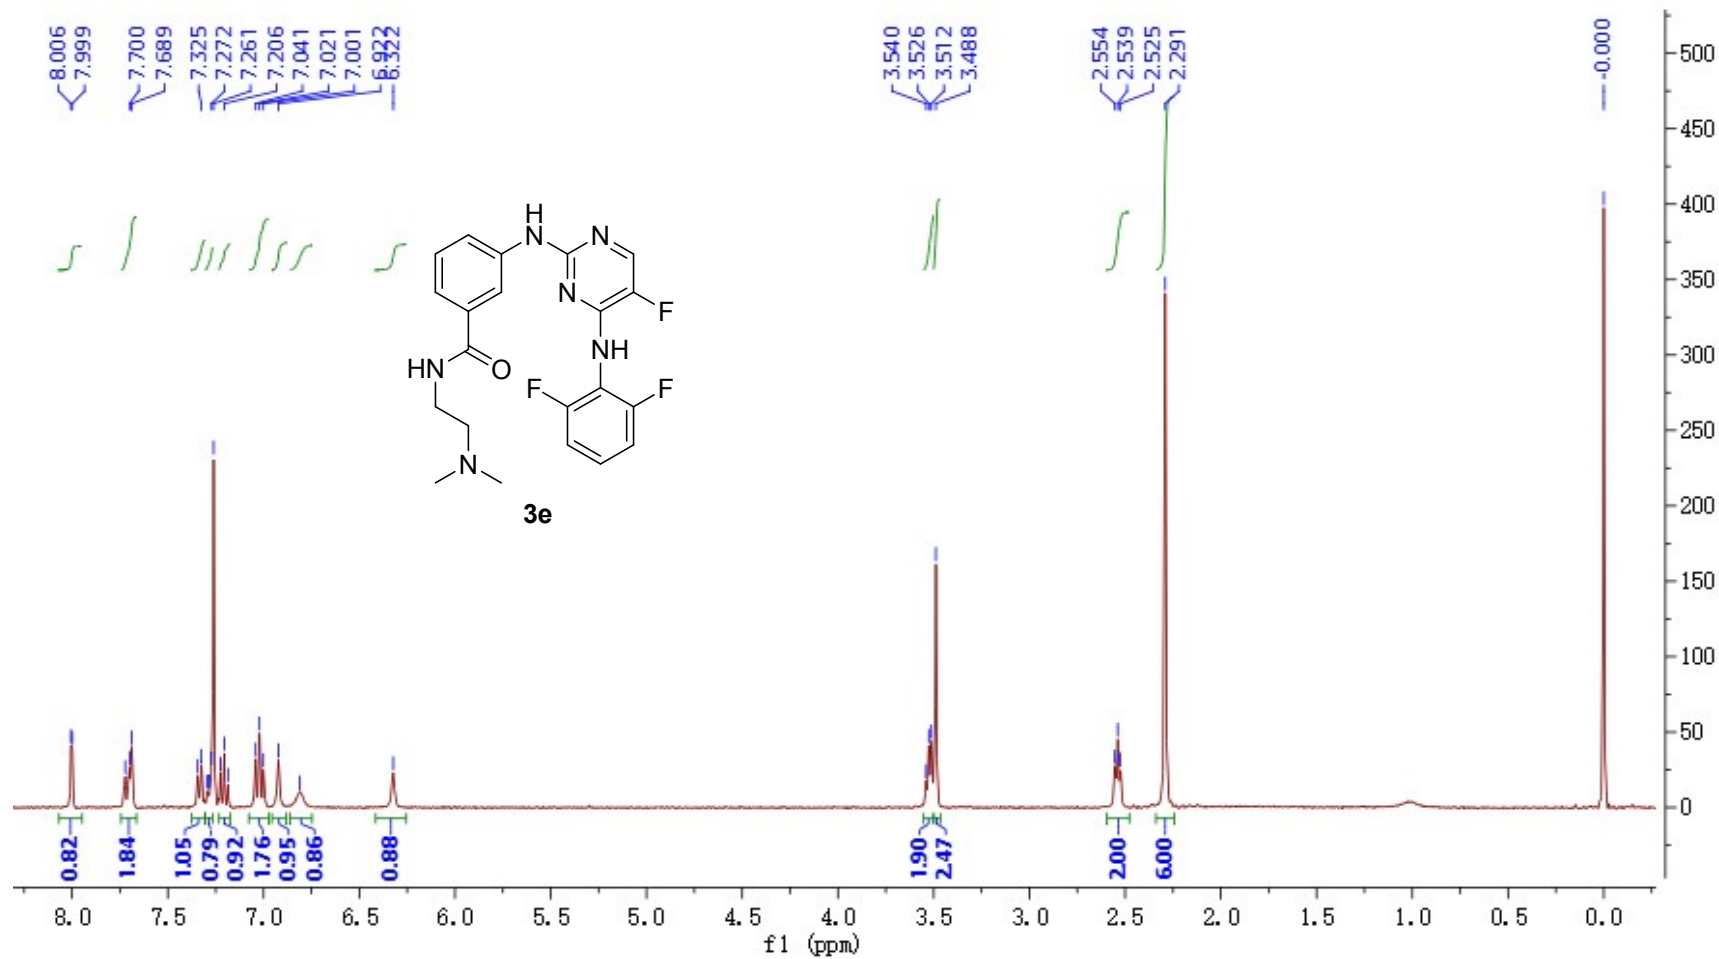



<sup>13</sup>C NMR spectrum for Compound 3e:

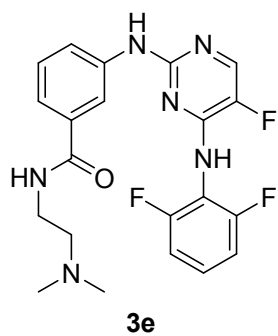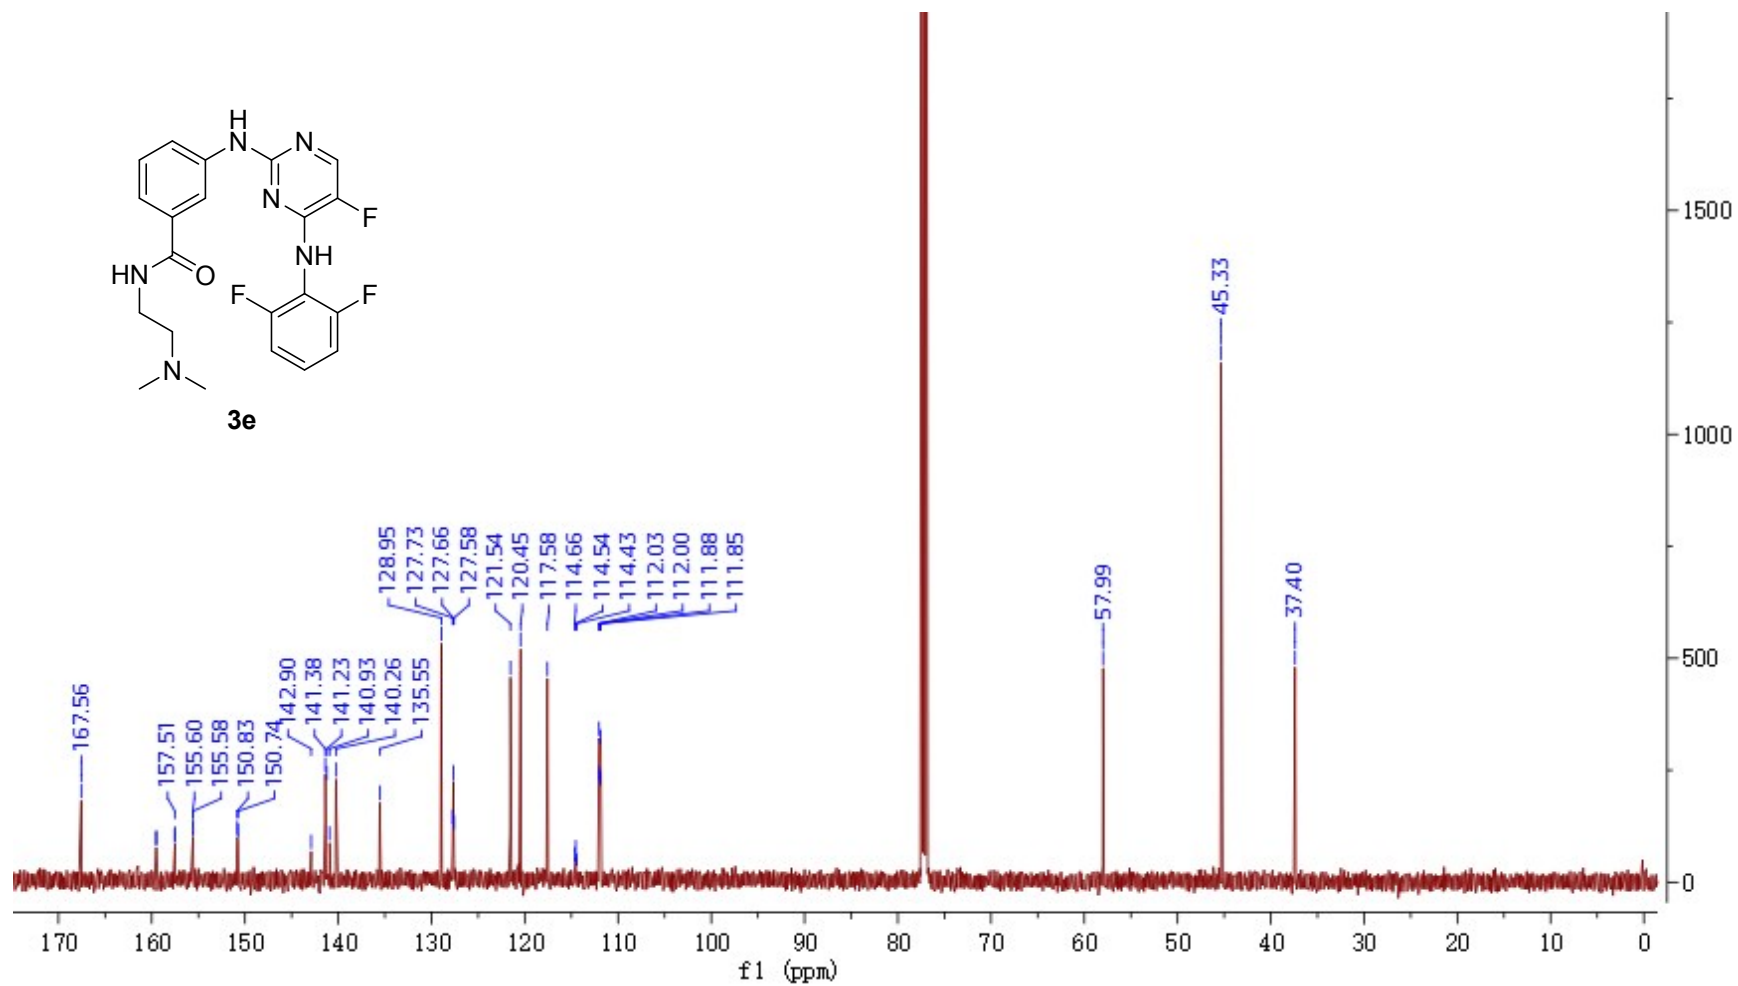

**<sup>1</sup>H NMR spectrum for Compound 3f:**

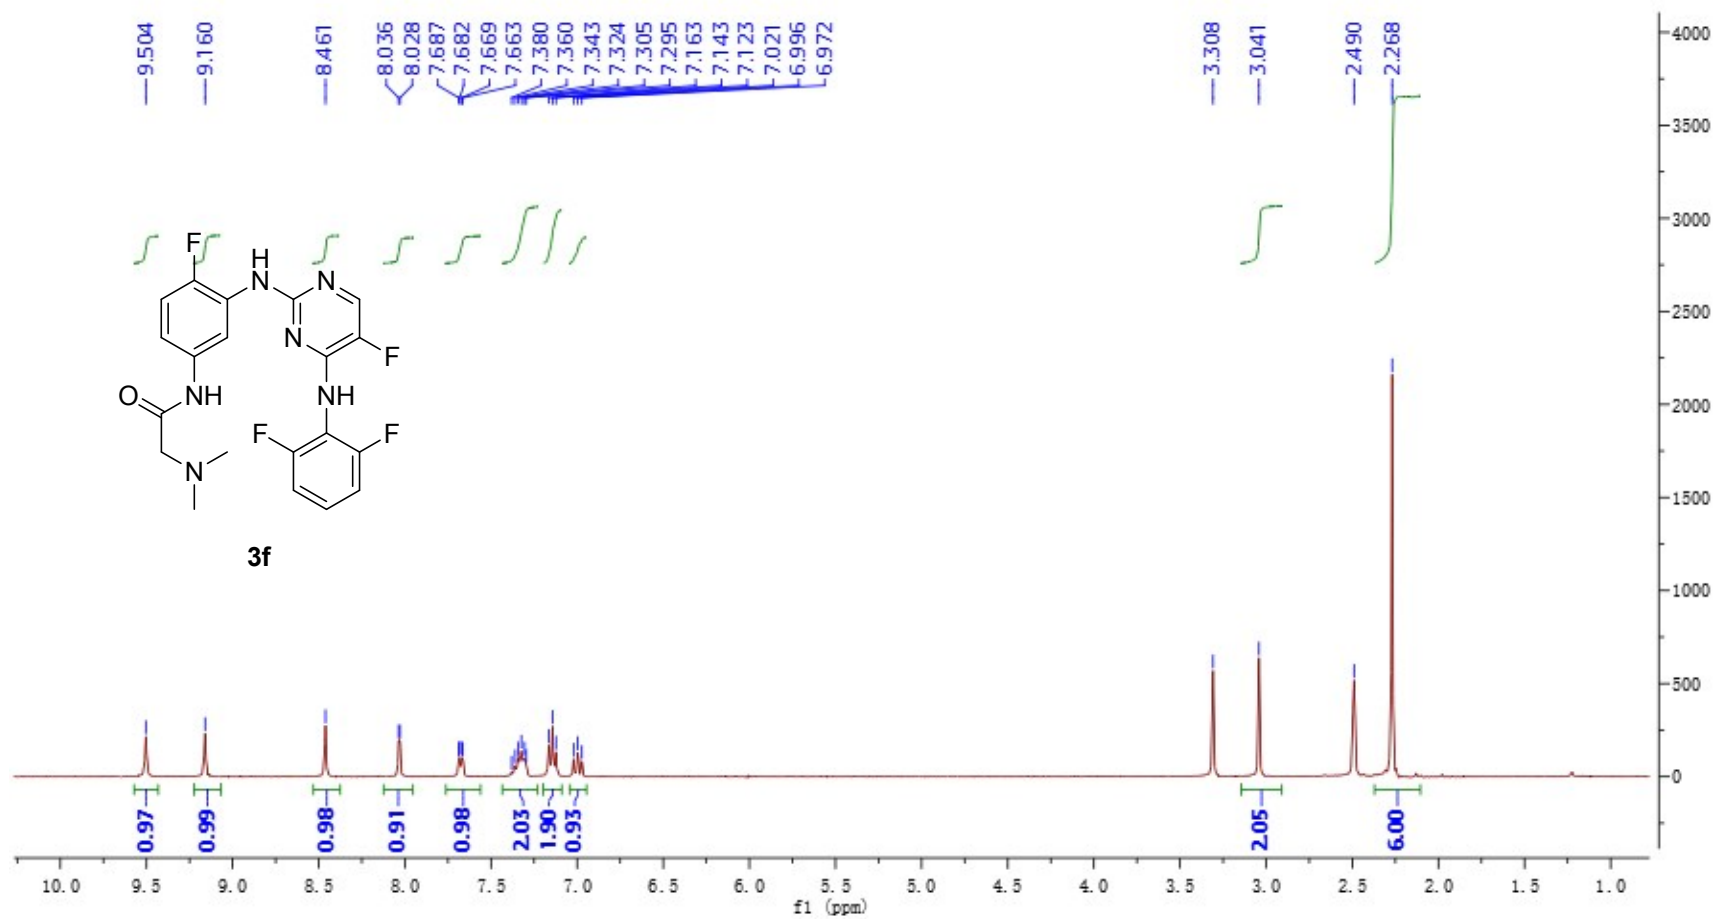

**<sup>13</sup>C NMR spectrum for Compound 3f:**

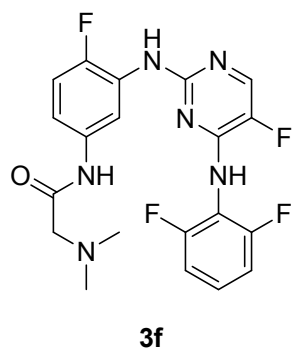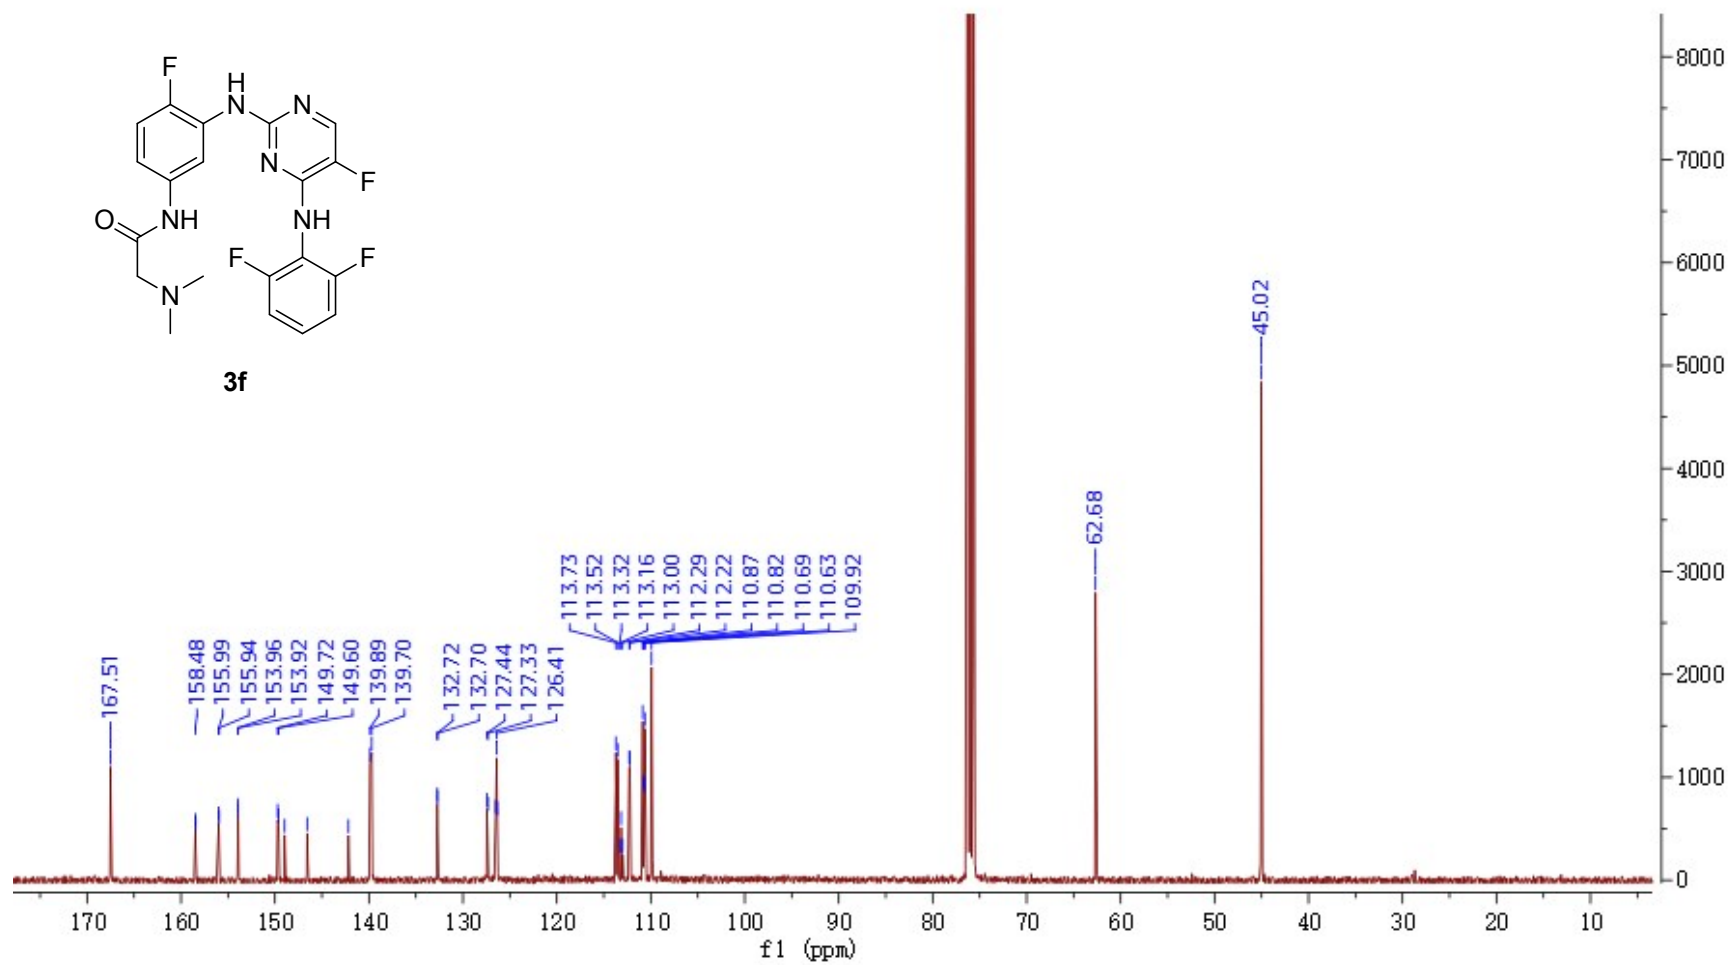

**<sup>1</sup>H NMR spectrum for Compound 3g:**

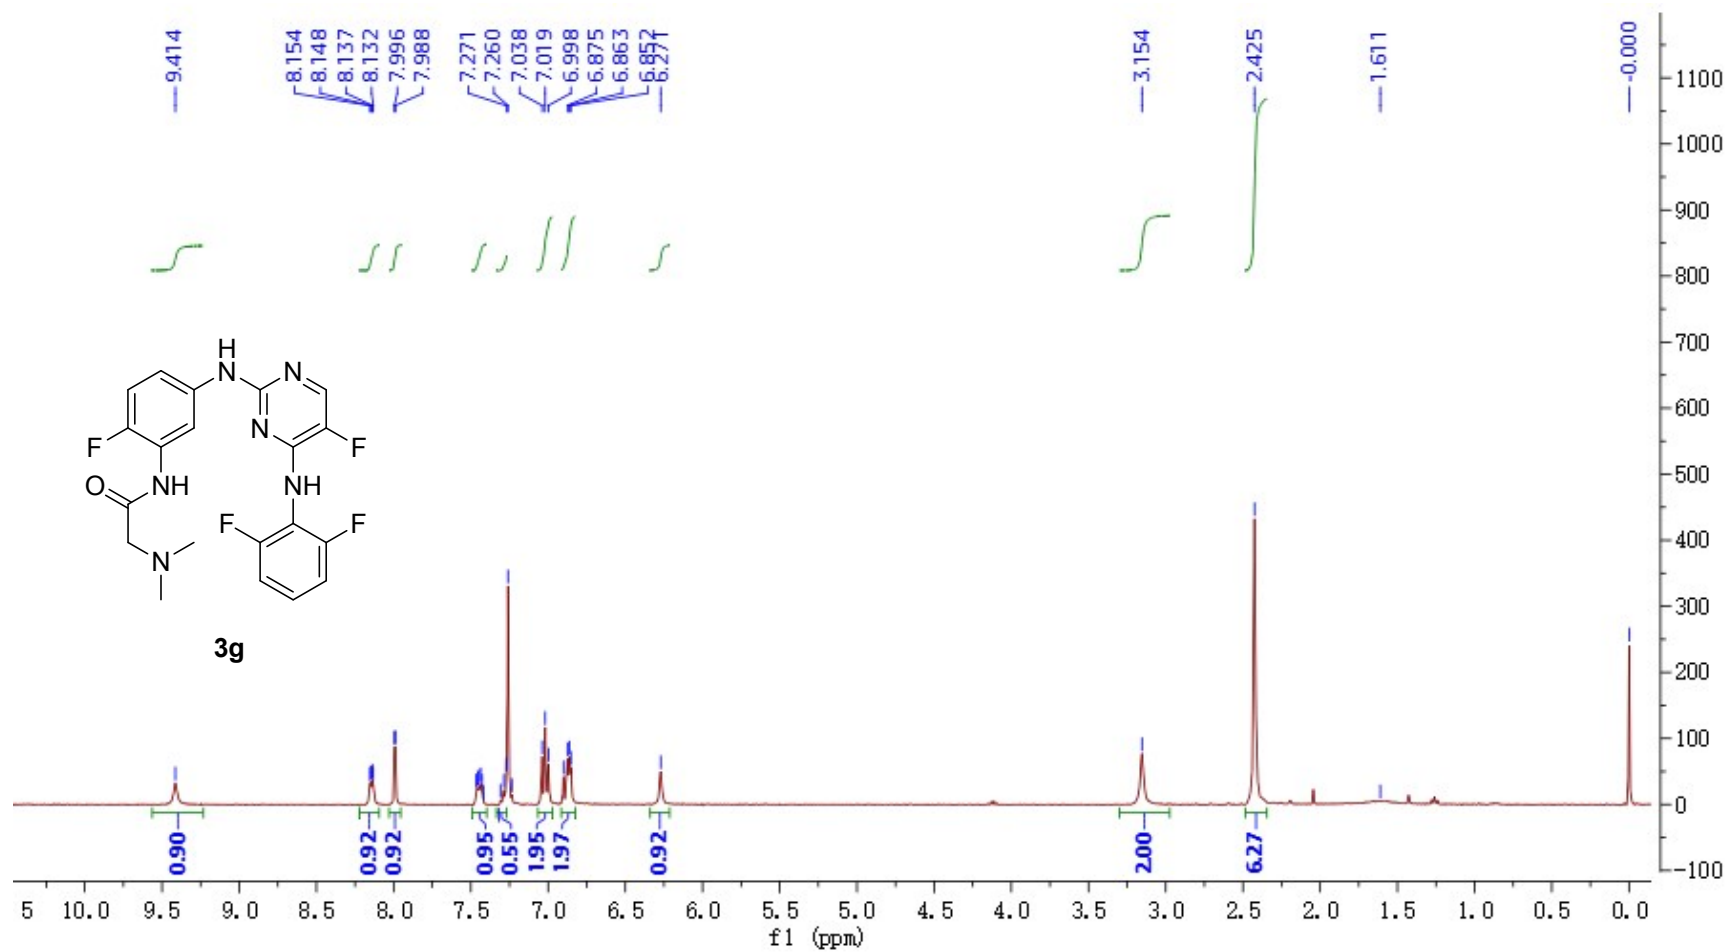

**<sup>13</sup>C NMR spectrum for Compound 3g:**

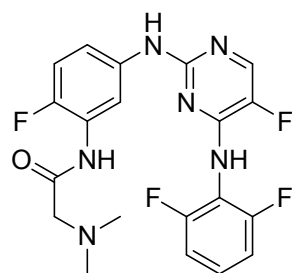

**3g**

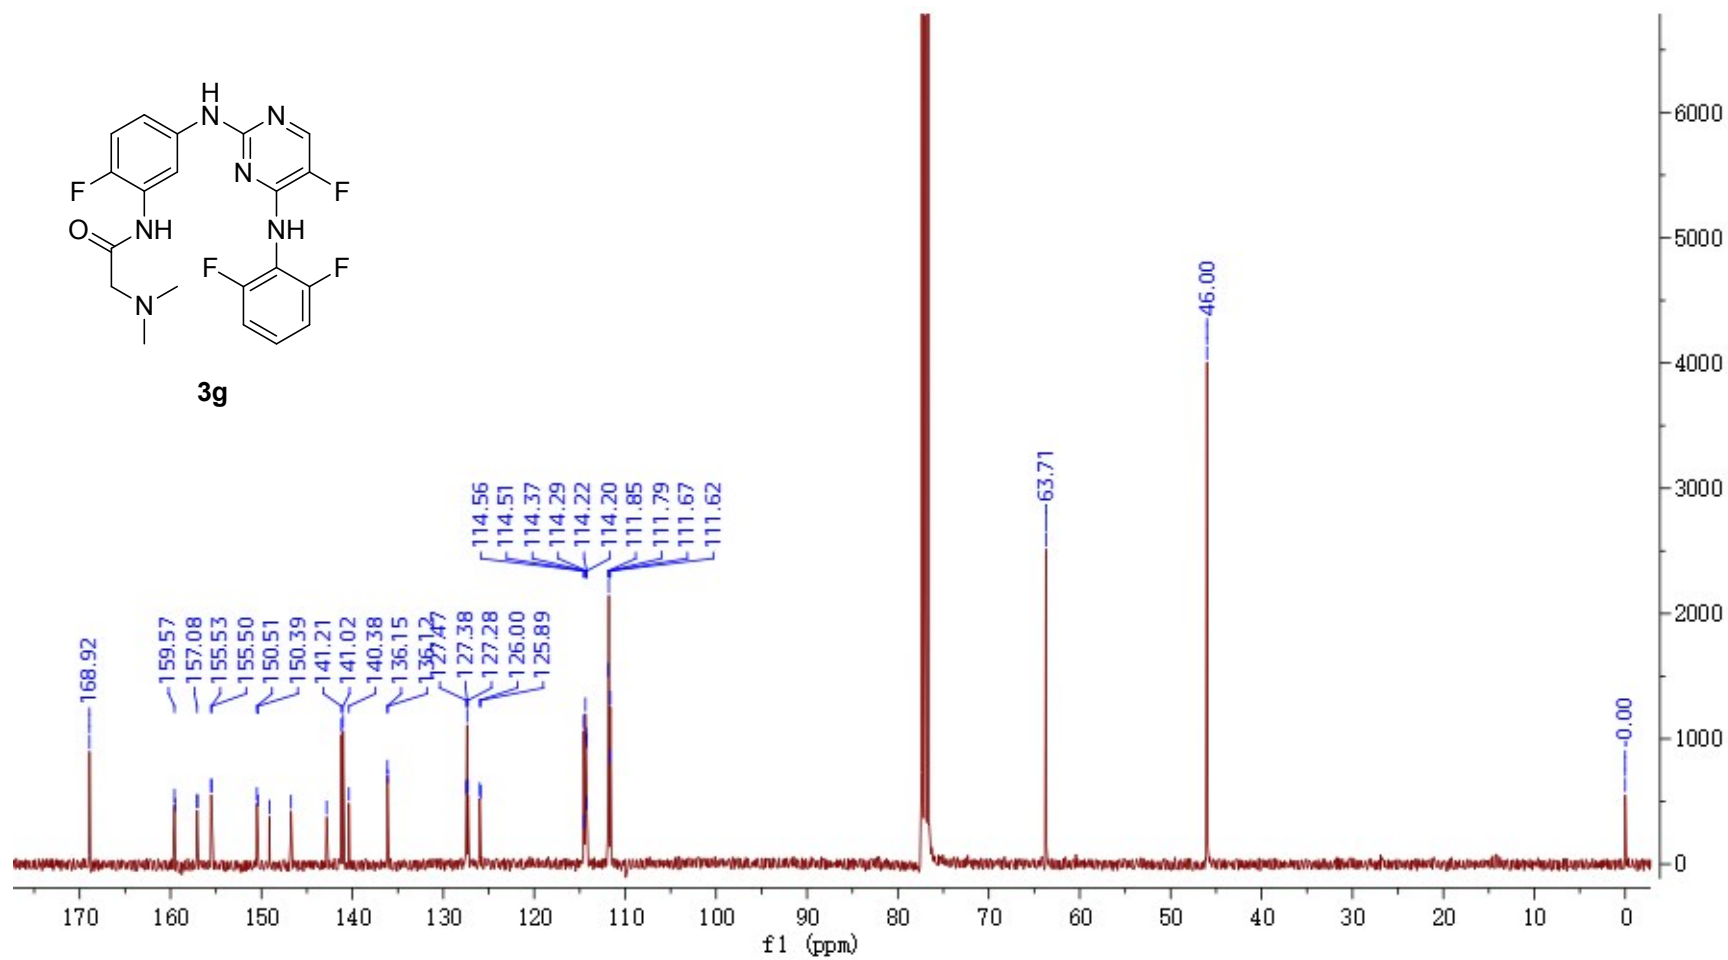

**<sup>1</sup>H NMR spectrum for Compound 3h:**

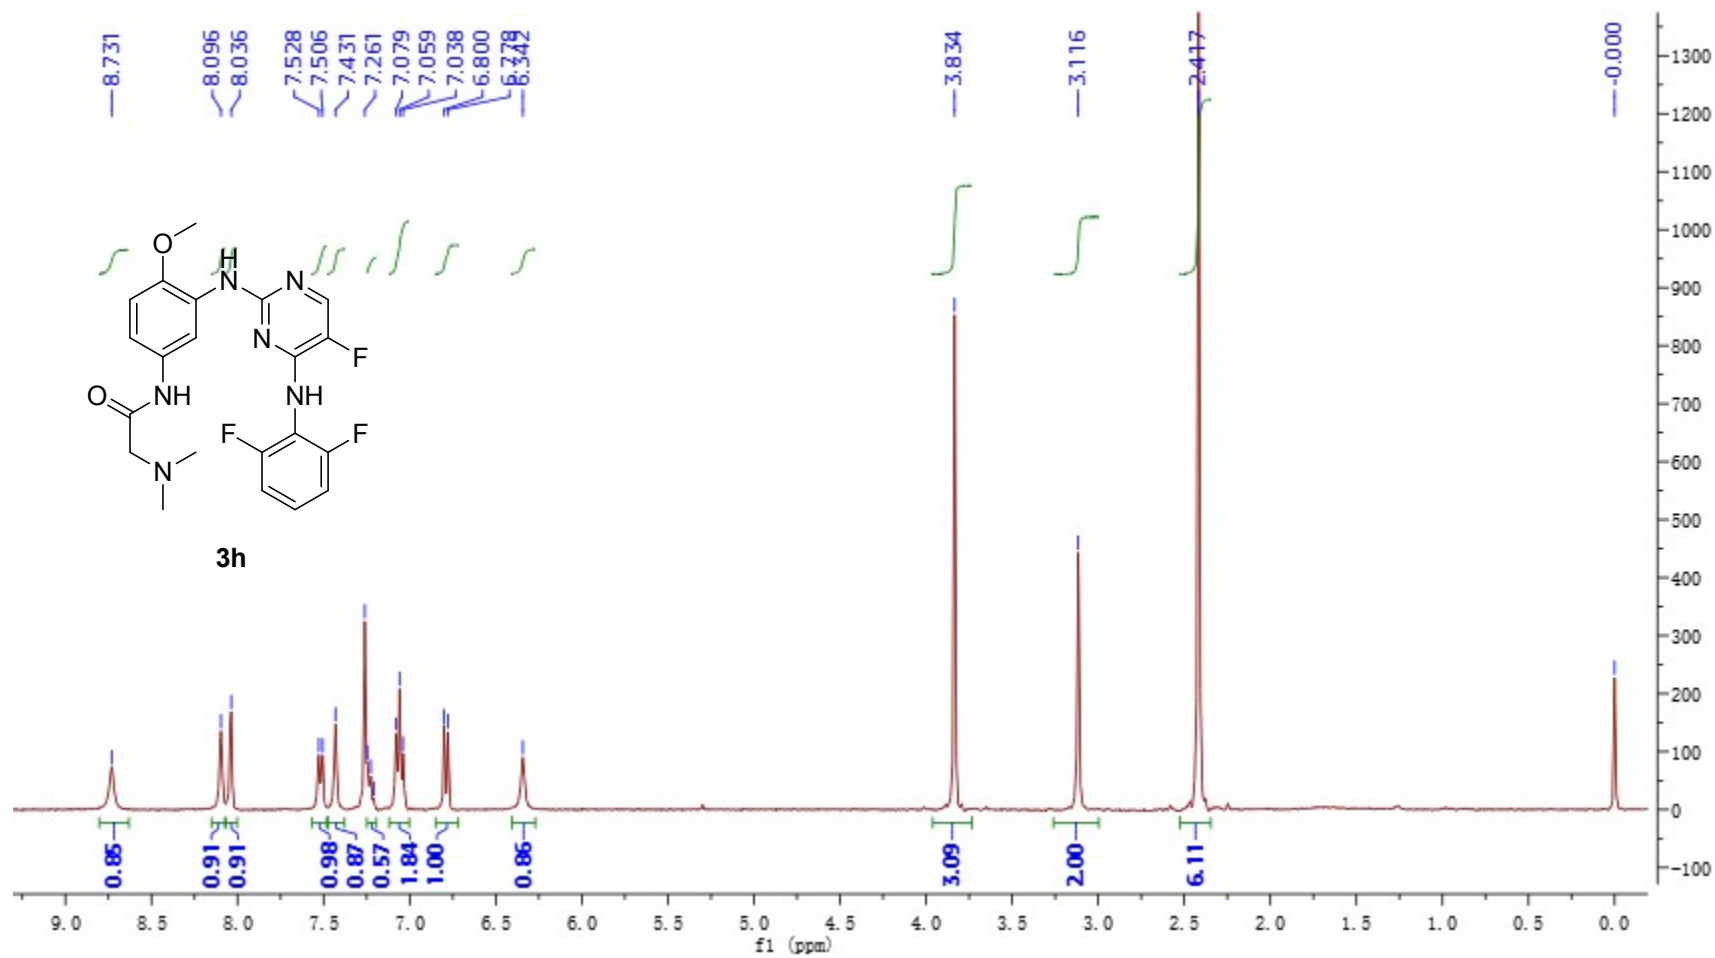

**<sup>13</sup>C NMR spectrum for Compound 3h:**

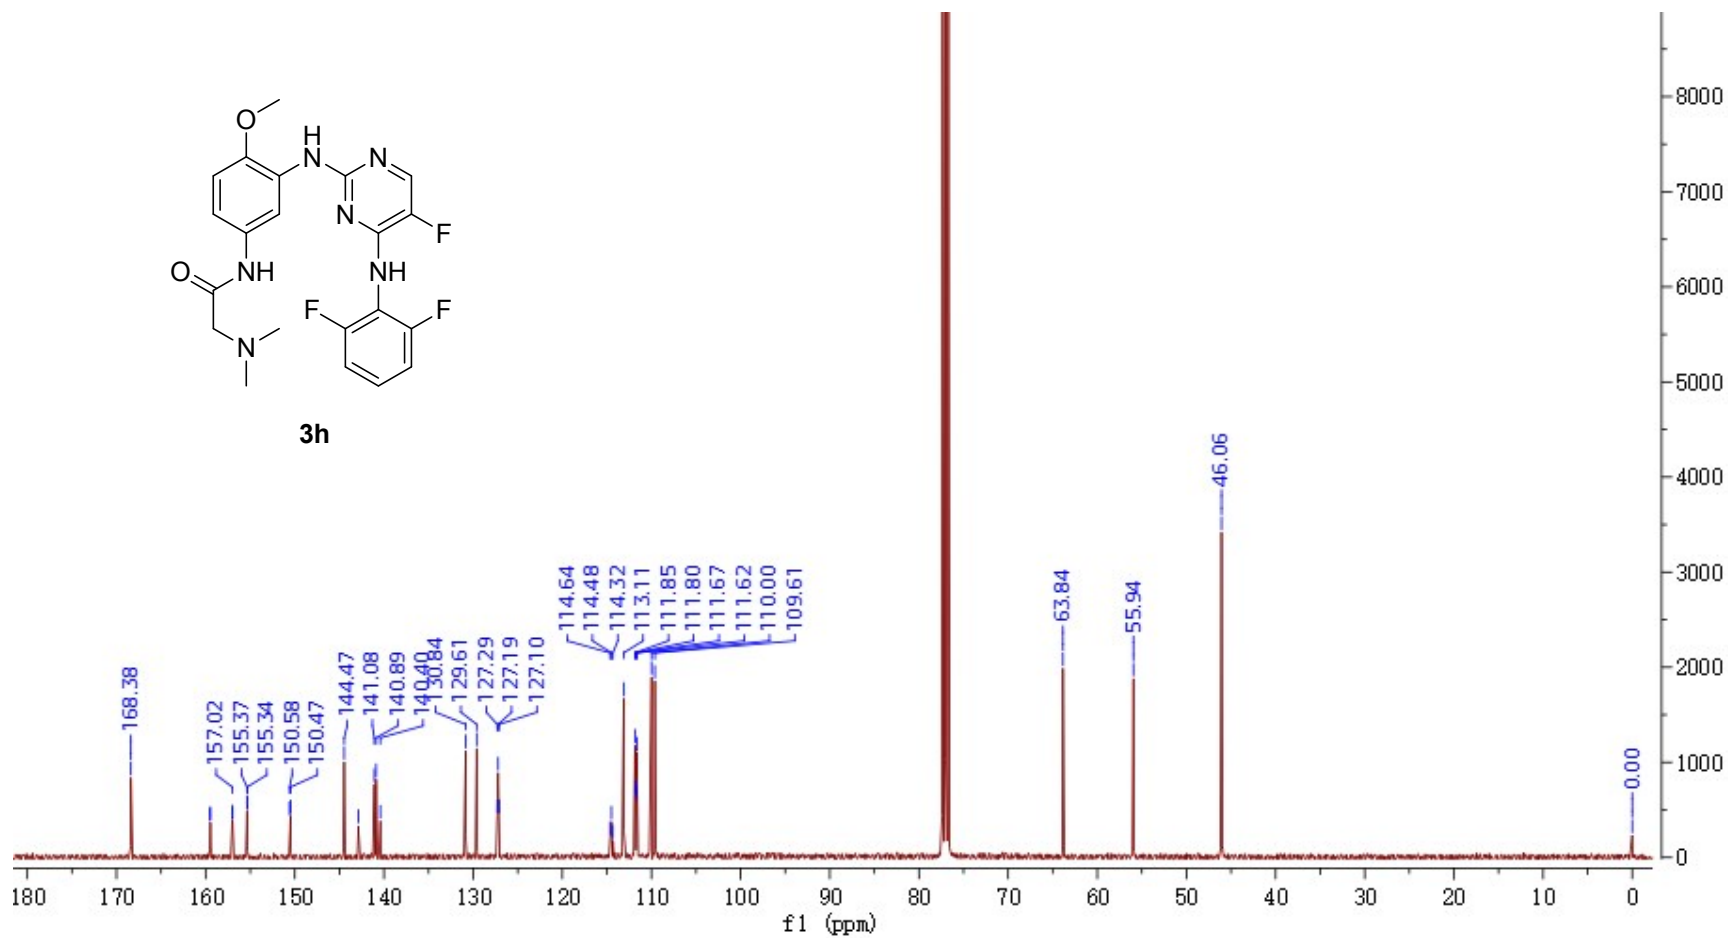

**<sup>1</sup>H NMR spectrum for Compound 3i:**

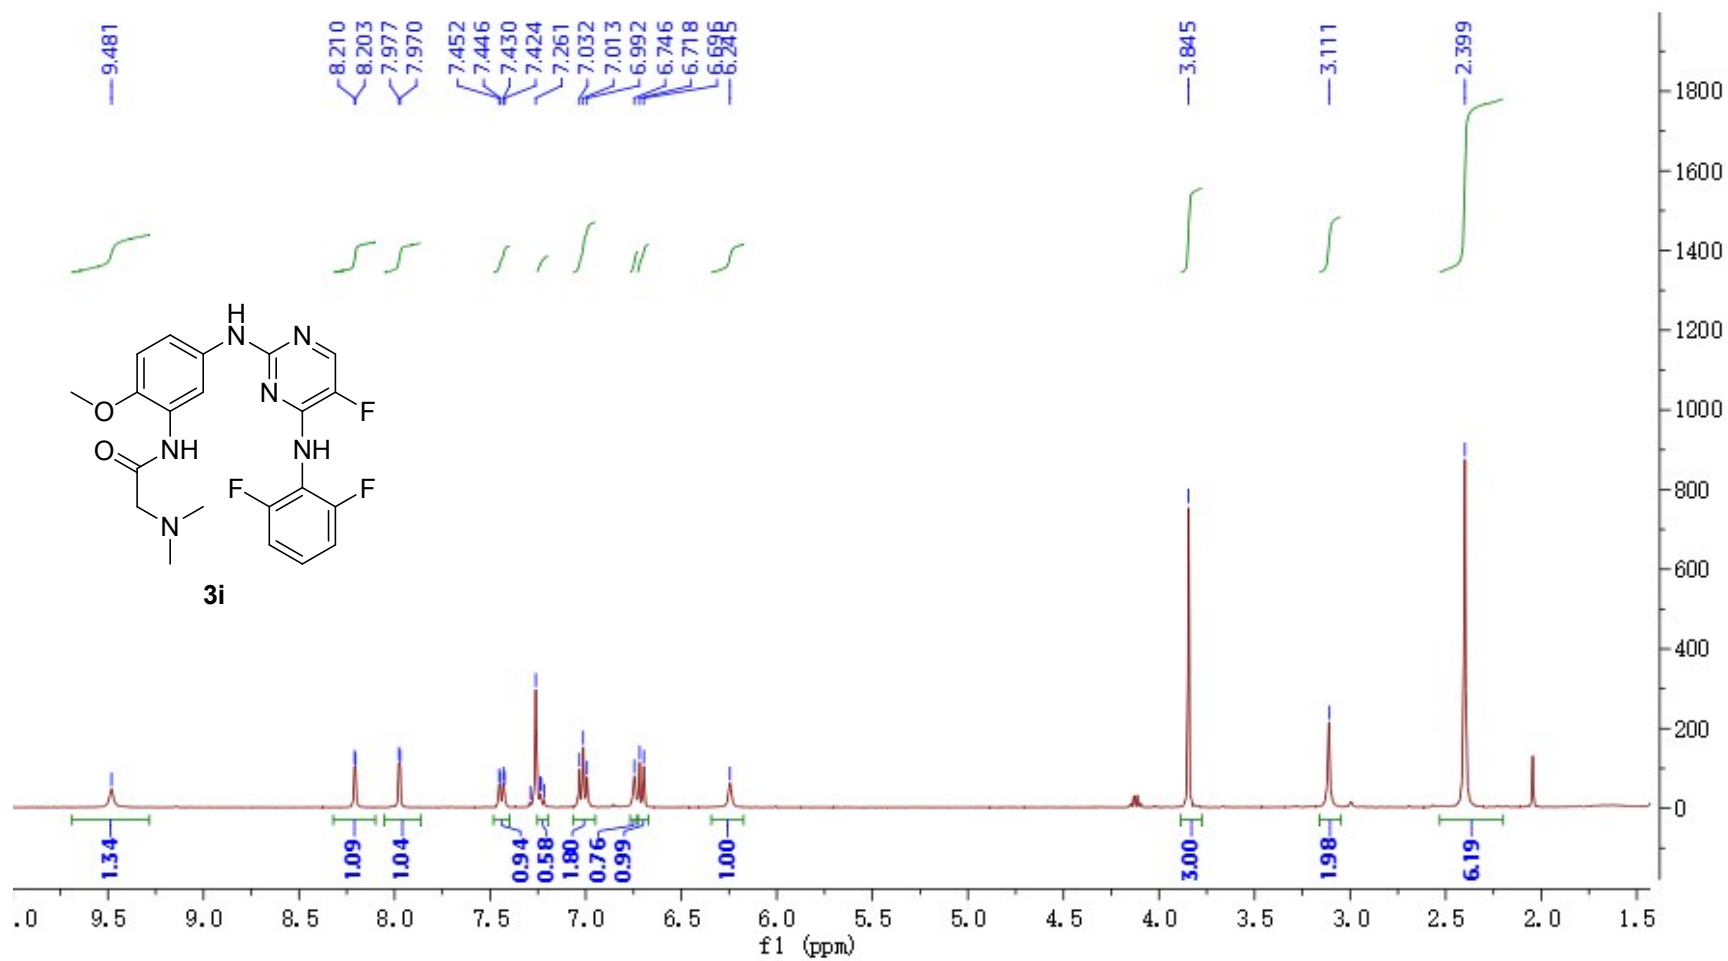



**<sup>13</sup>C NMR spectrum for Compound 3i:**

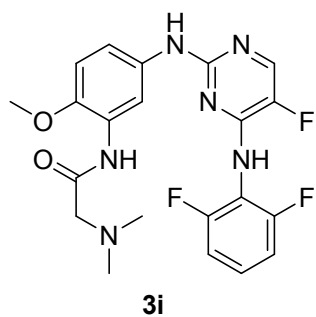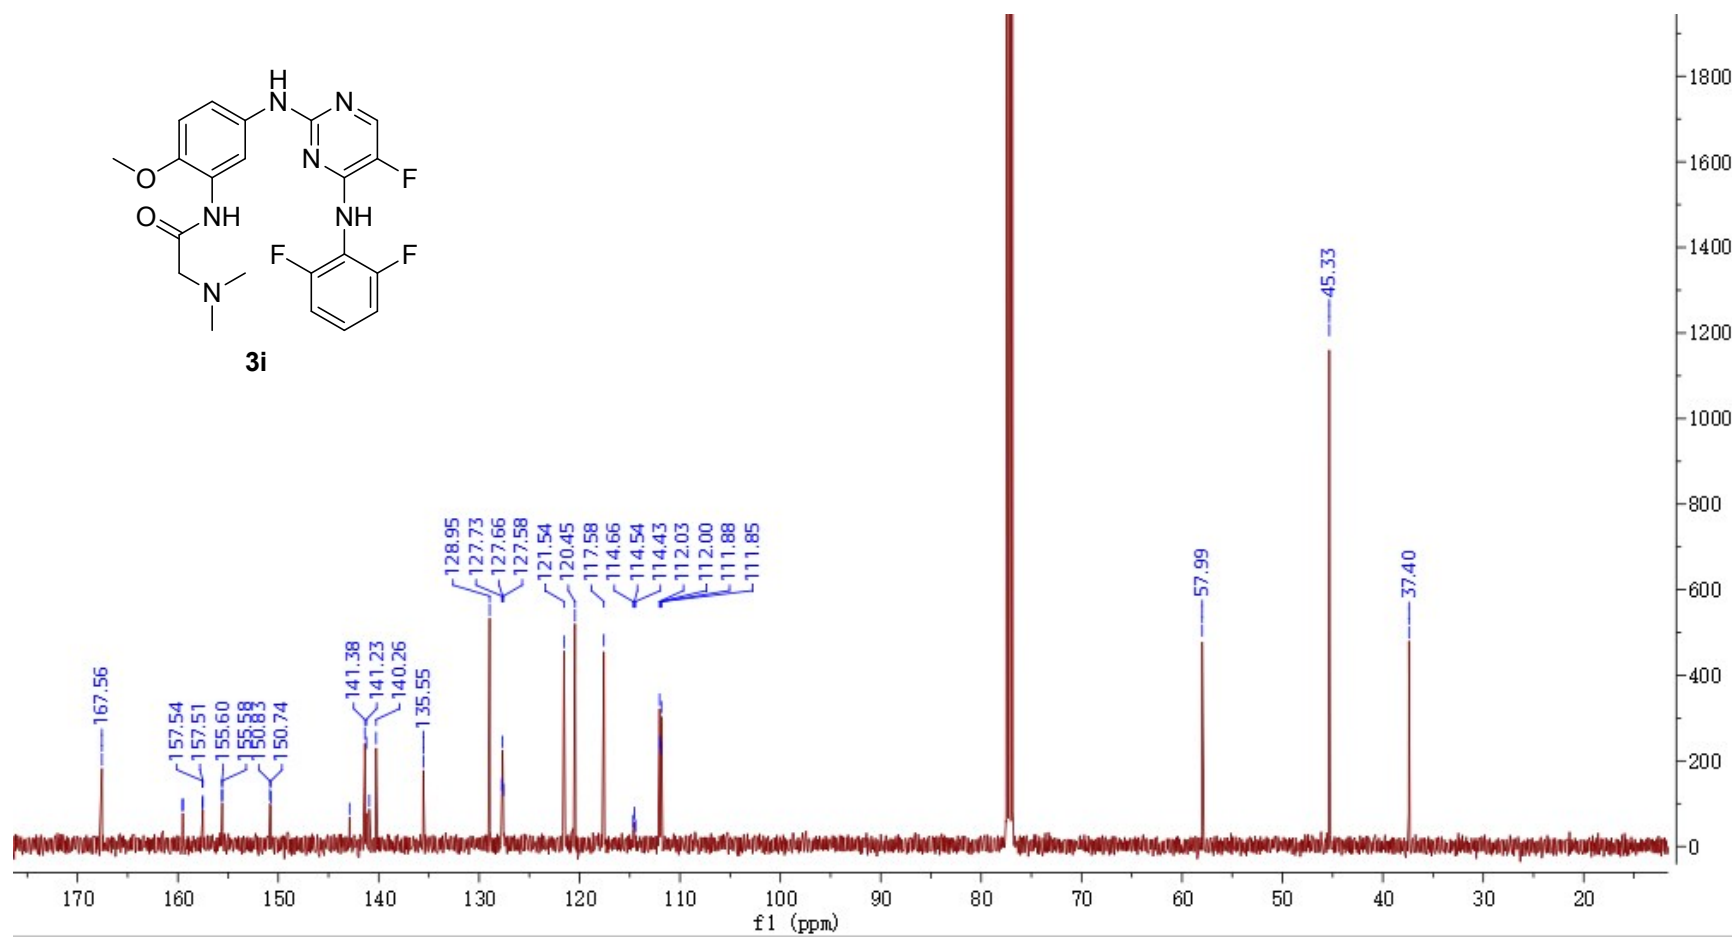

**<sup>1</sup>H NMR spectrum for Compound 3j:**

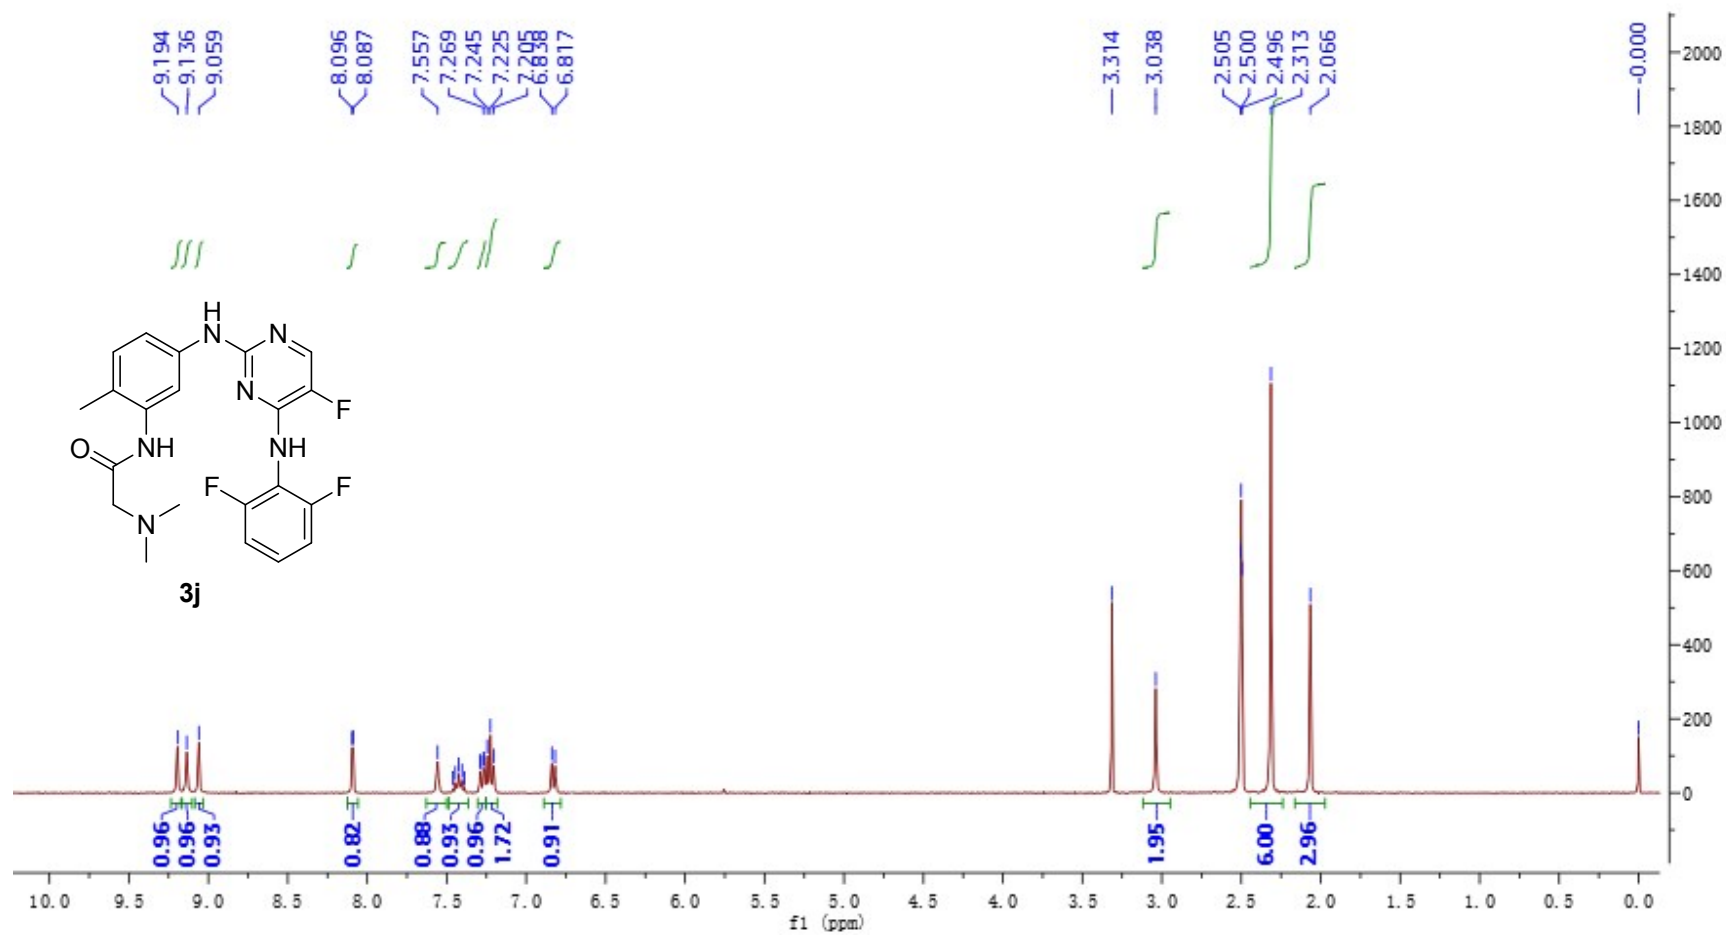

**<sup>13</sup>C NMR spectrum for Compound 3j:**

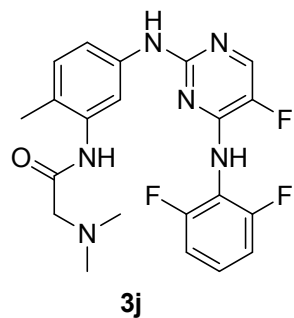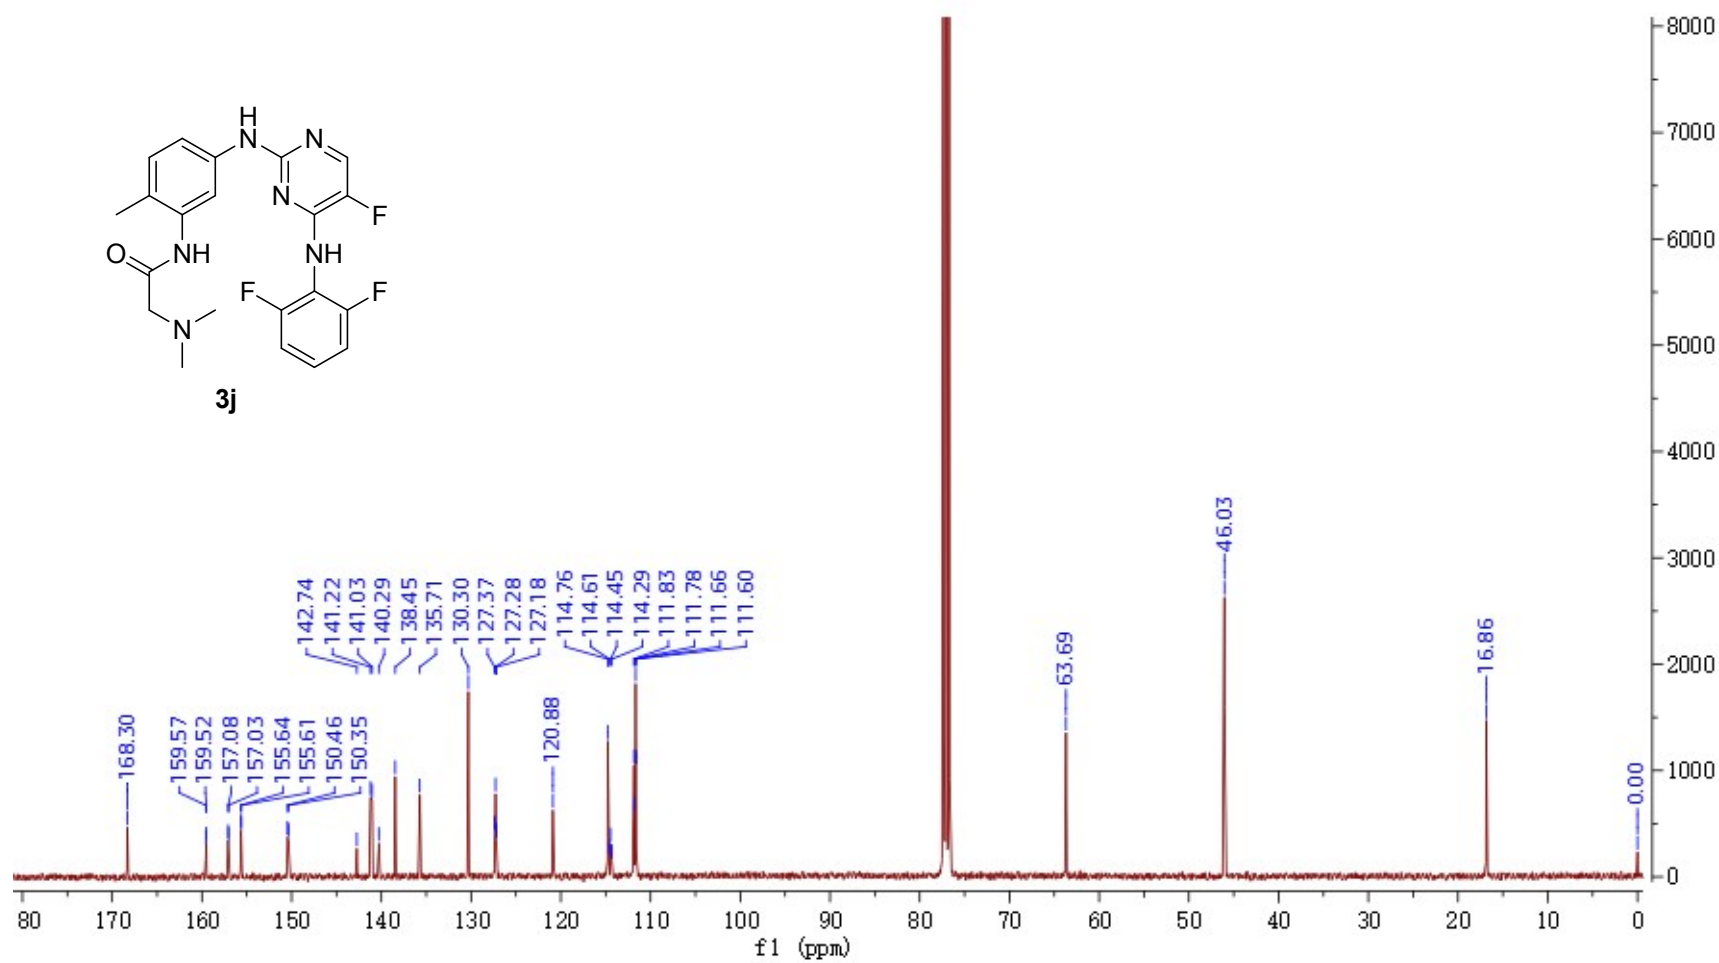

**<sup>1</sup>H NMR spectrum for Compound 3k:**

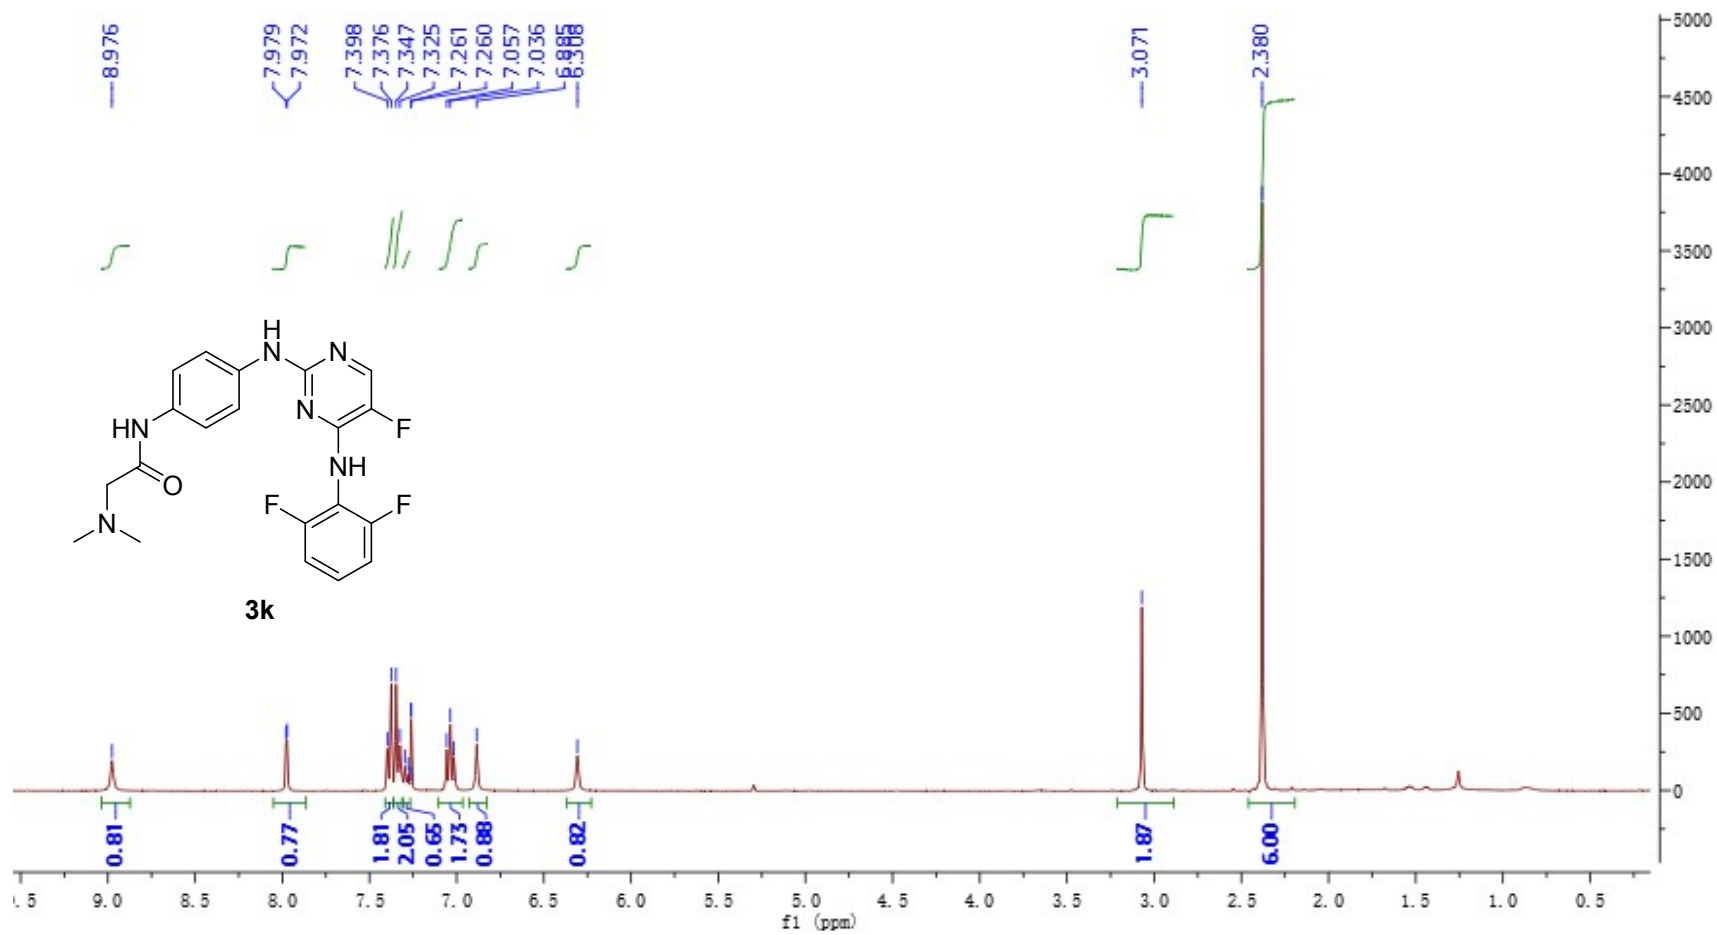

<sup>13</sup>C NMR spectrum for Compound 3k:

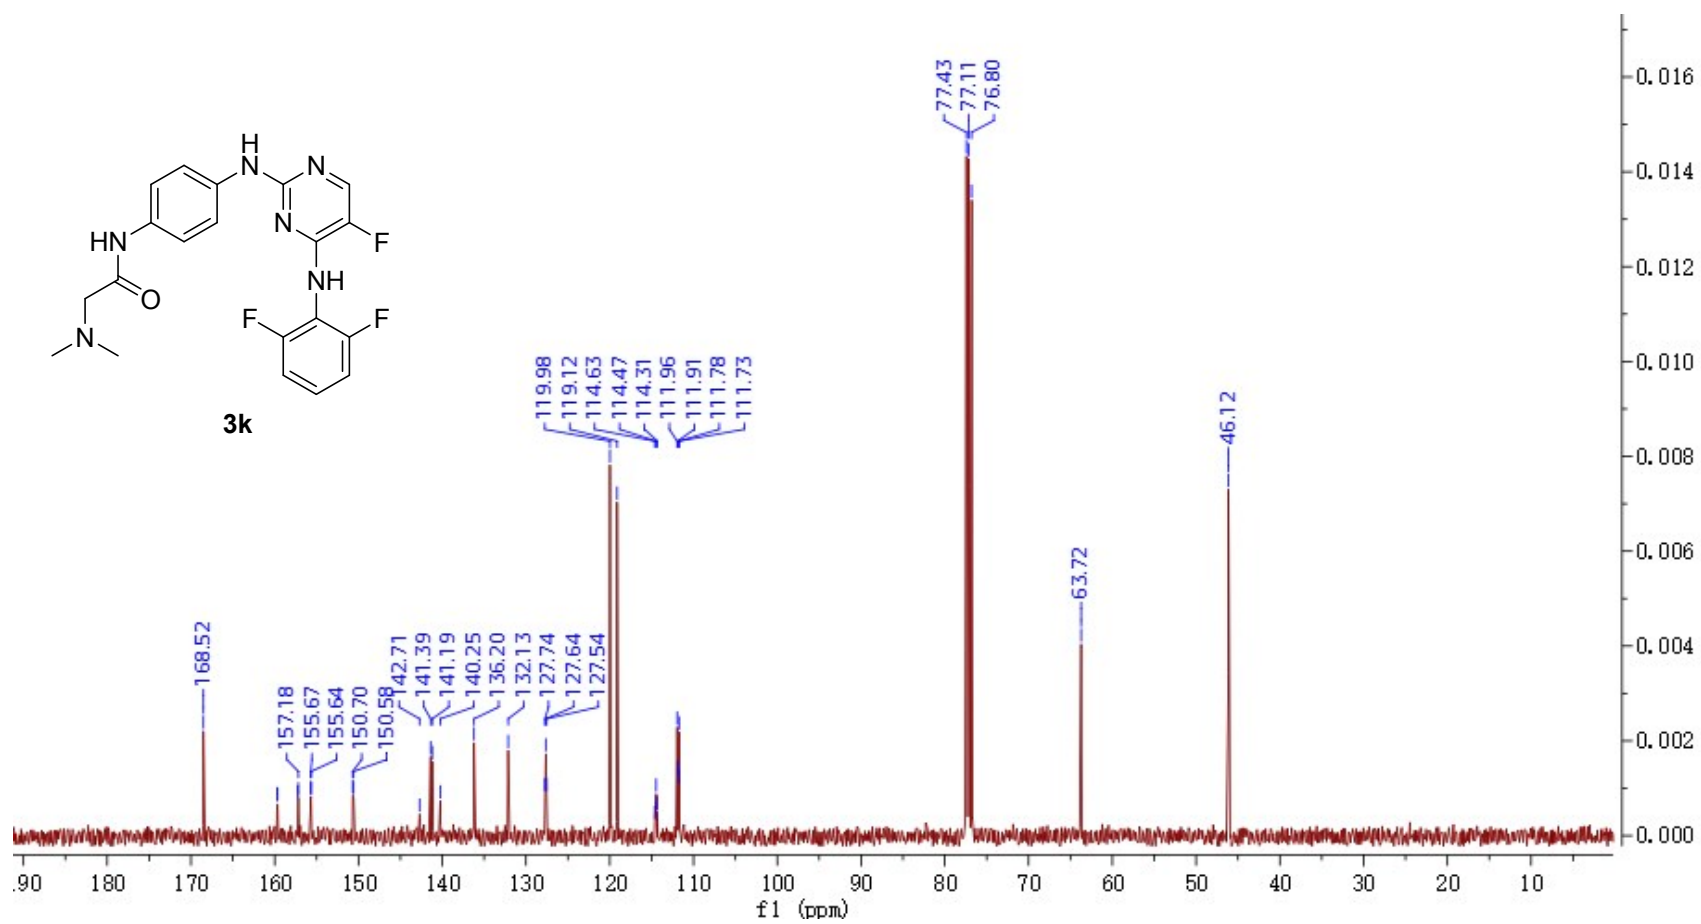

**<sup>1</sup>H NMR spectrum for Compound 3l:**

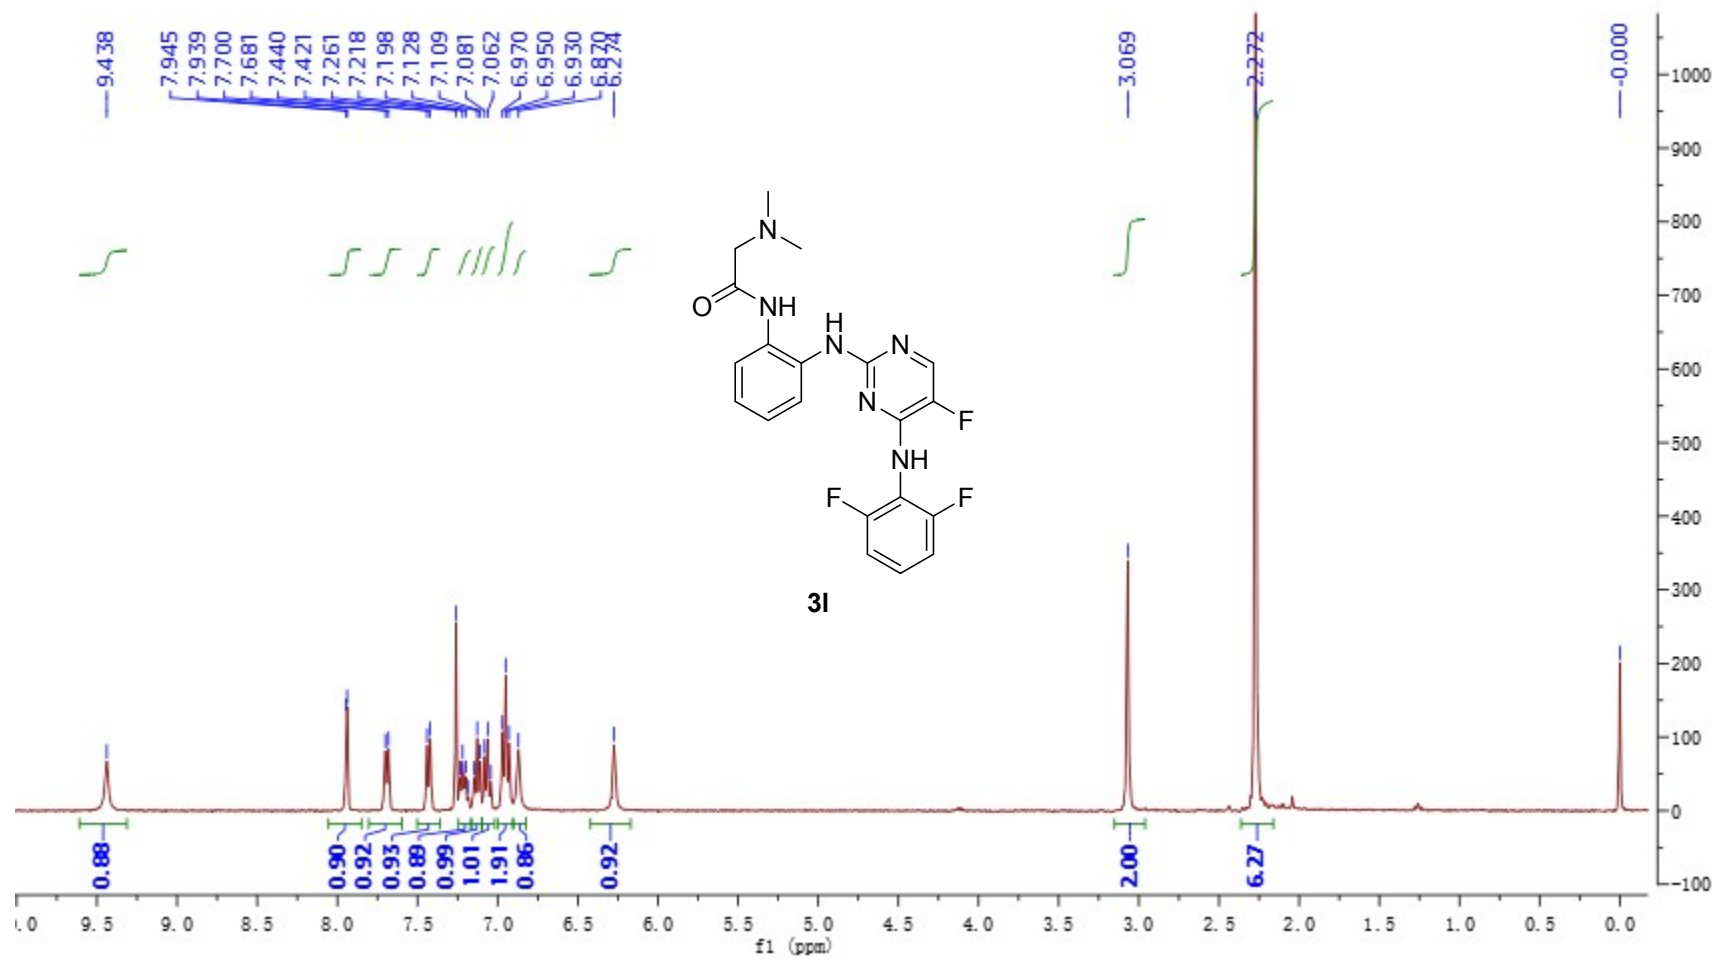

<sup>13</sup>C NMR spectrum for Compound 3l:

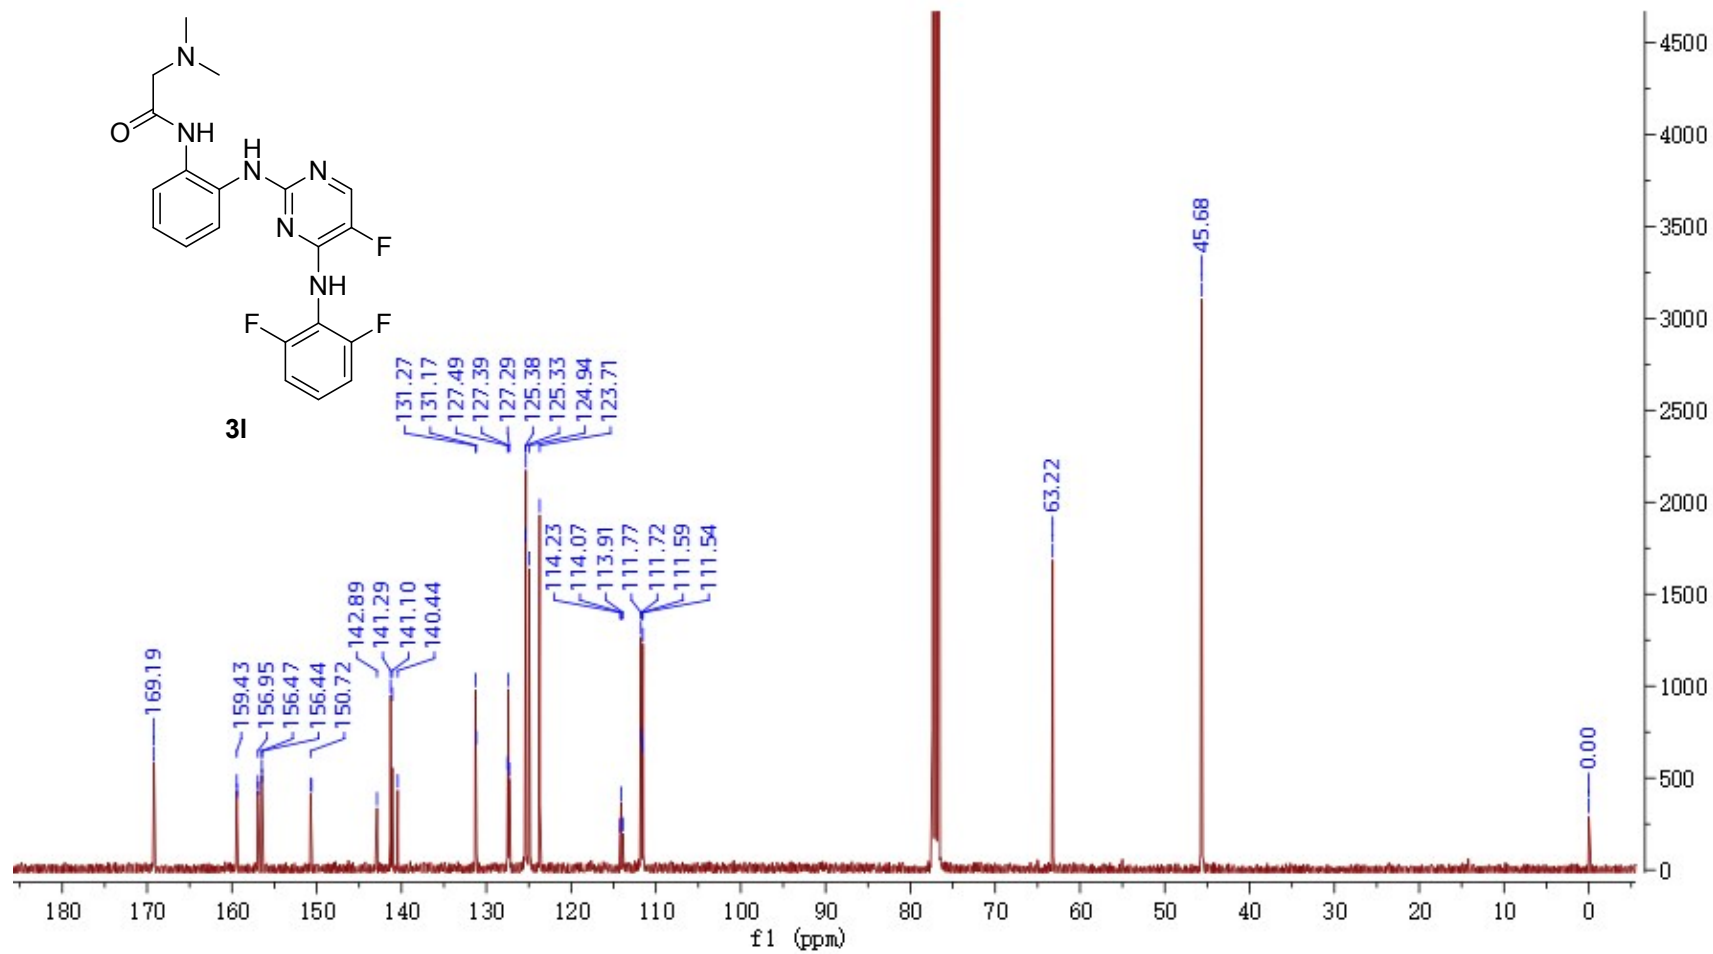

**<sup>1</sup>H NMR spectrum for Compound 3m:**

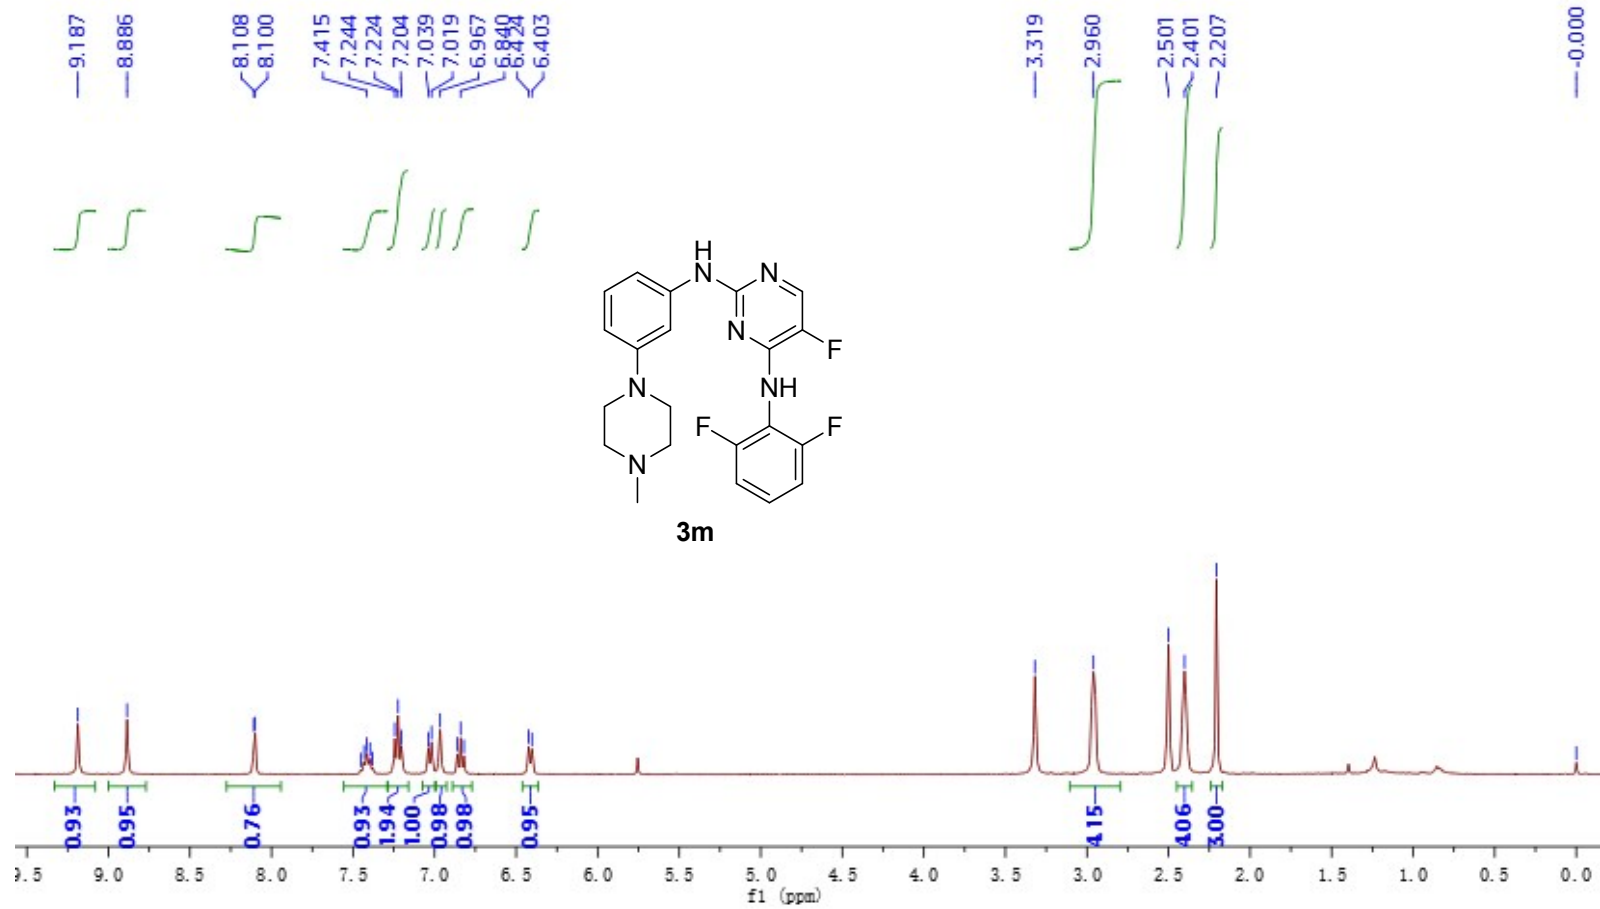



<sup>13</sup>C NMR spectrum for Compound 3m:

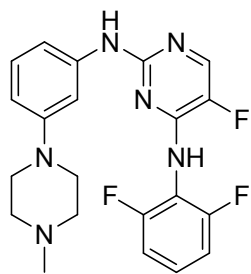

3m

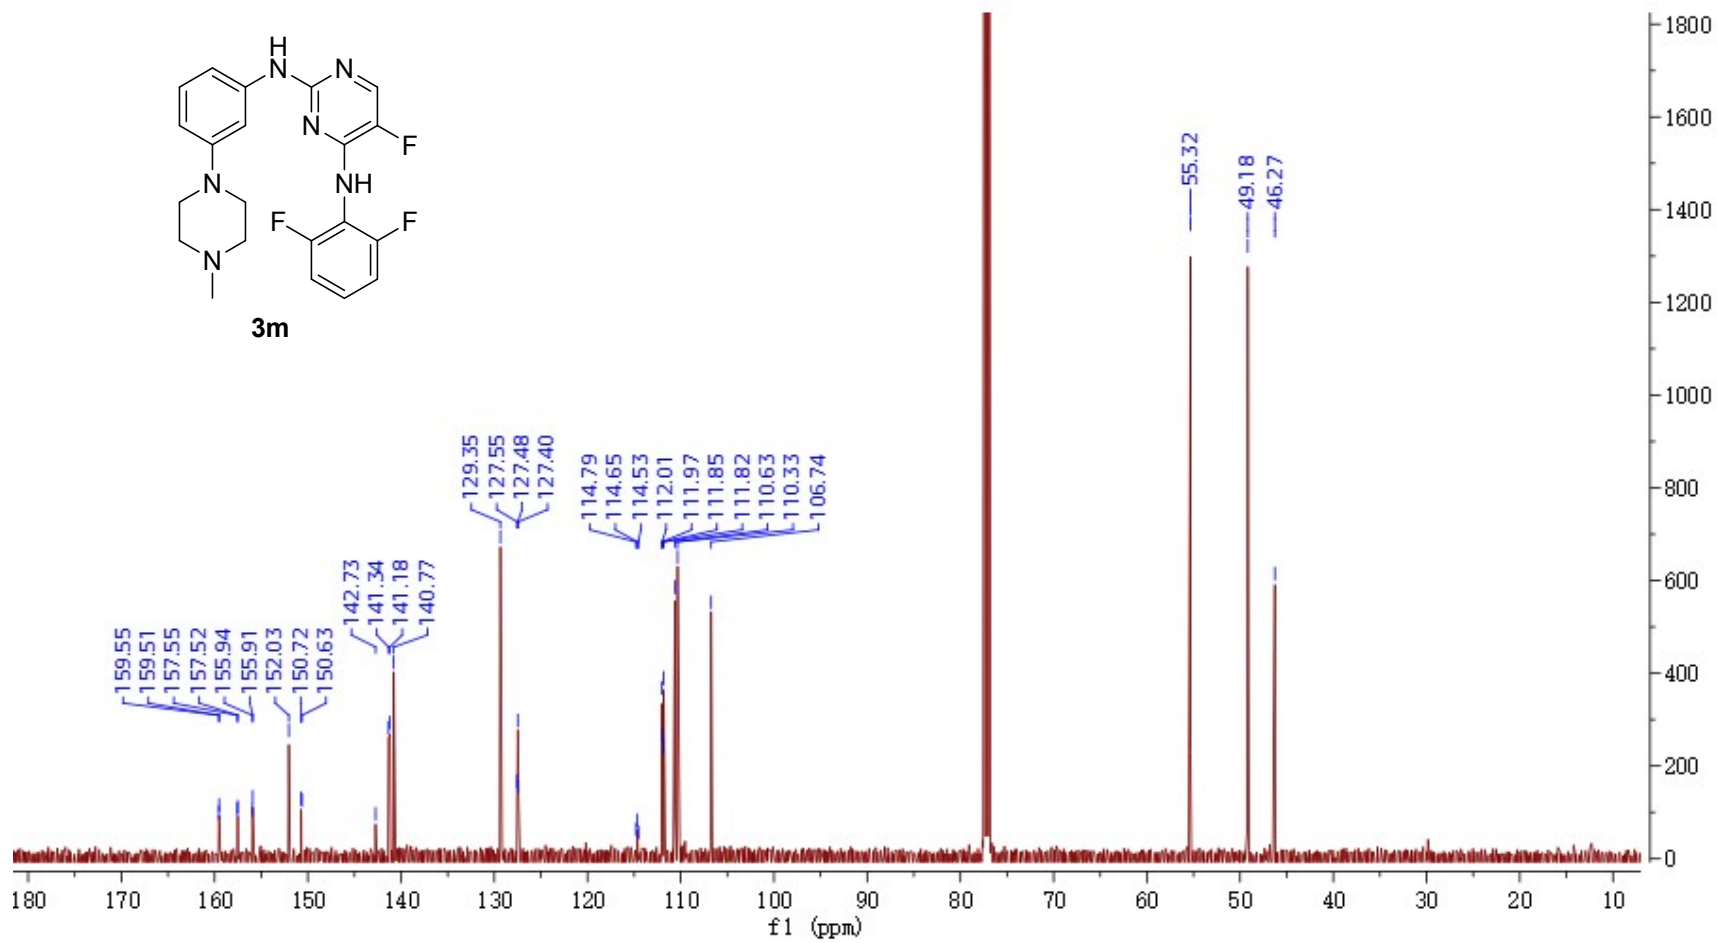

**<sup>1</sup>H NMR spectrum for Compound 3n:**

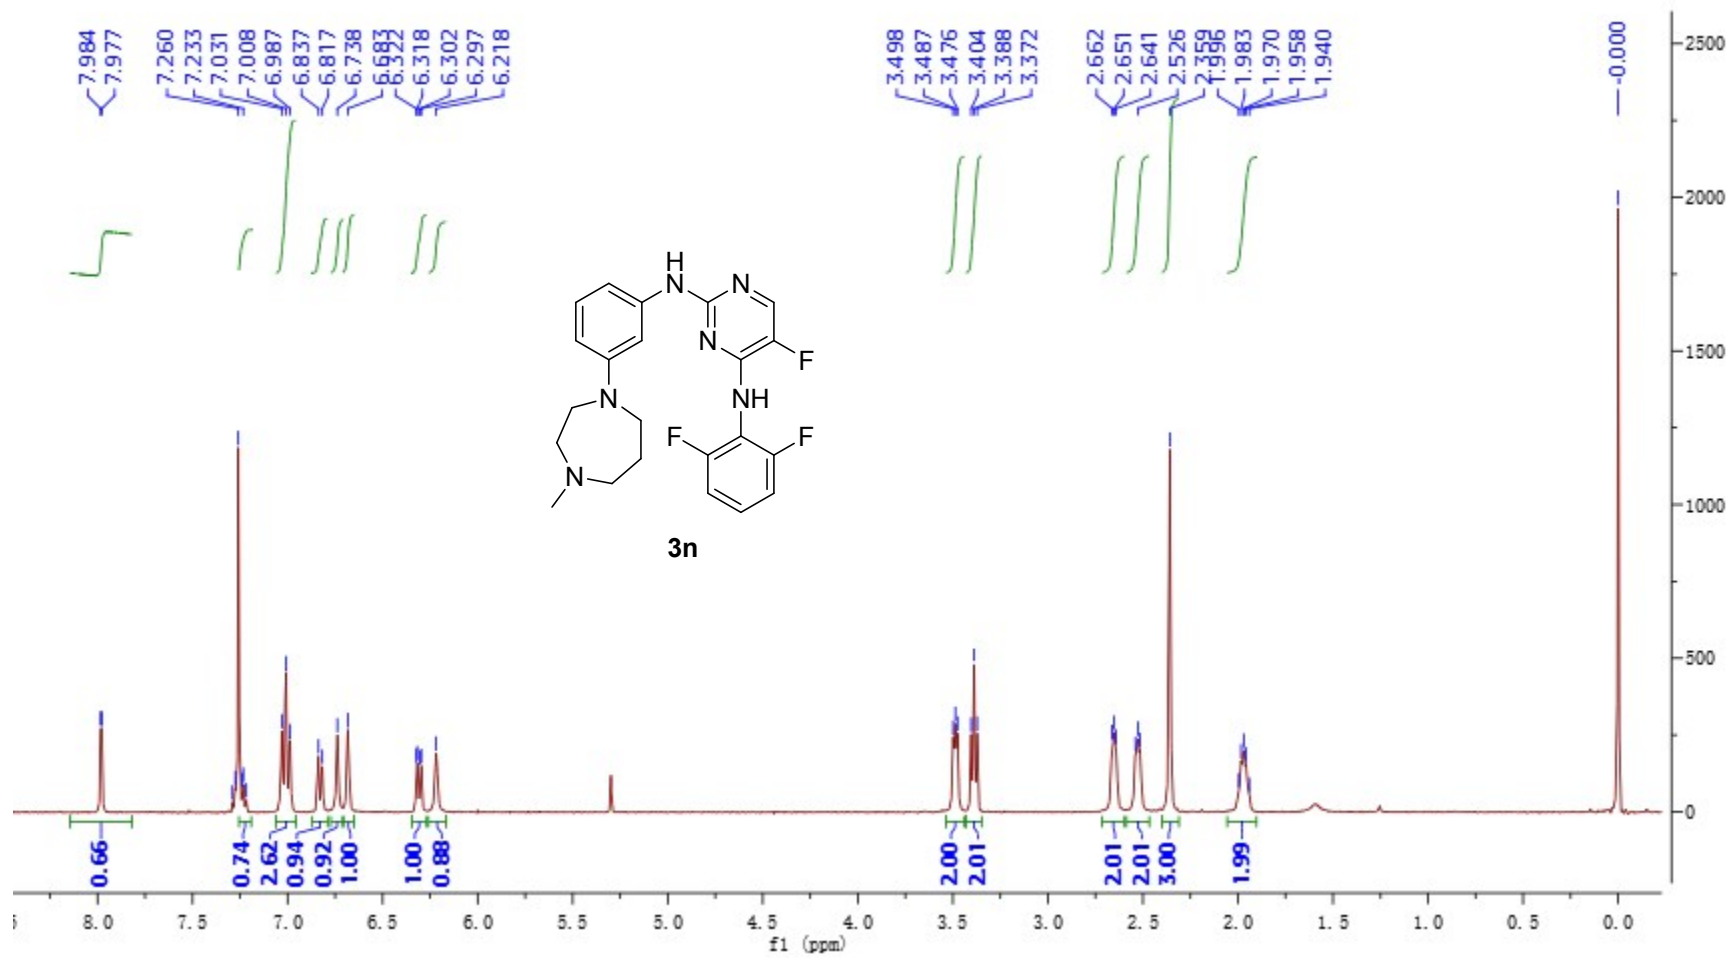

**<sup>13</sup>C NMR spectrum for Compound 3n:**

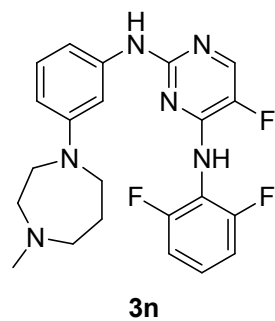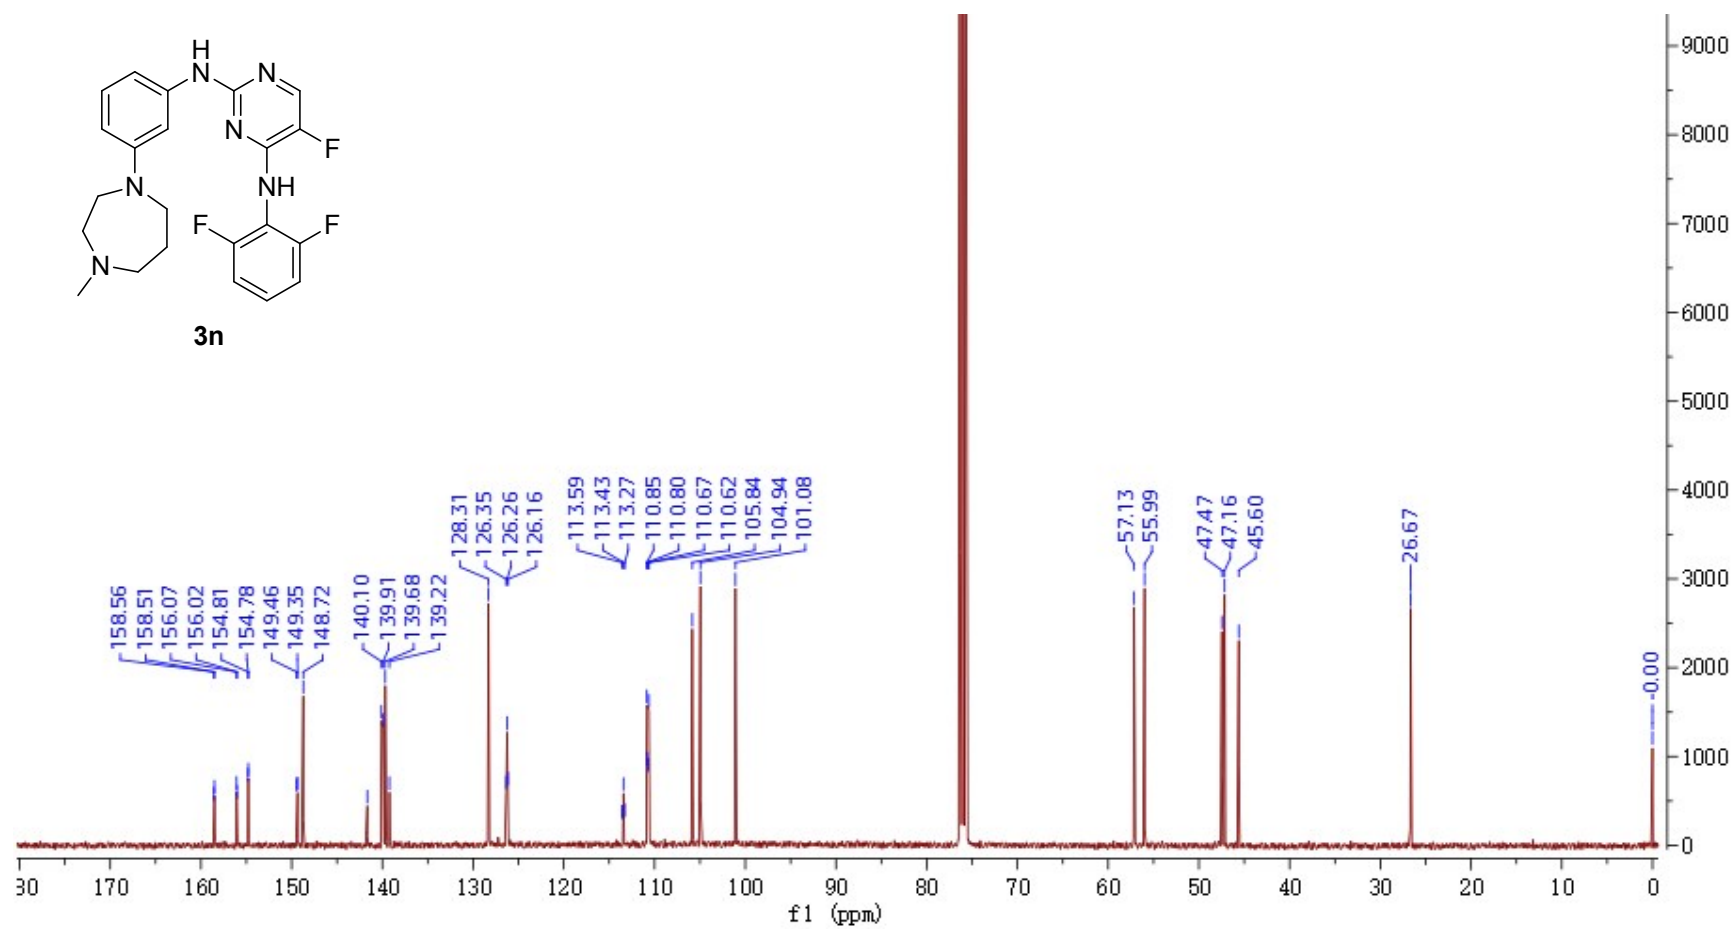

**<sup>1</sup>H NMR spectrum for Compound 3o:**

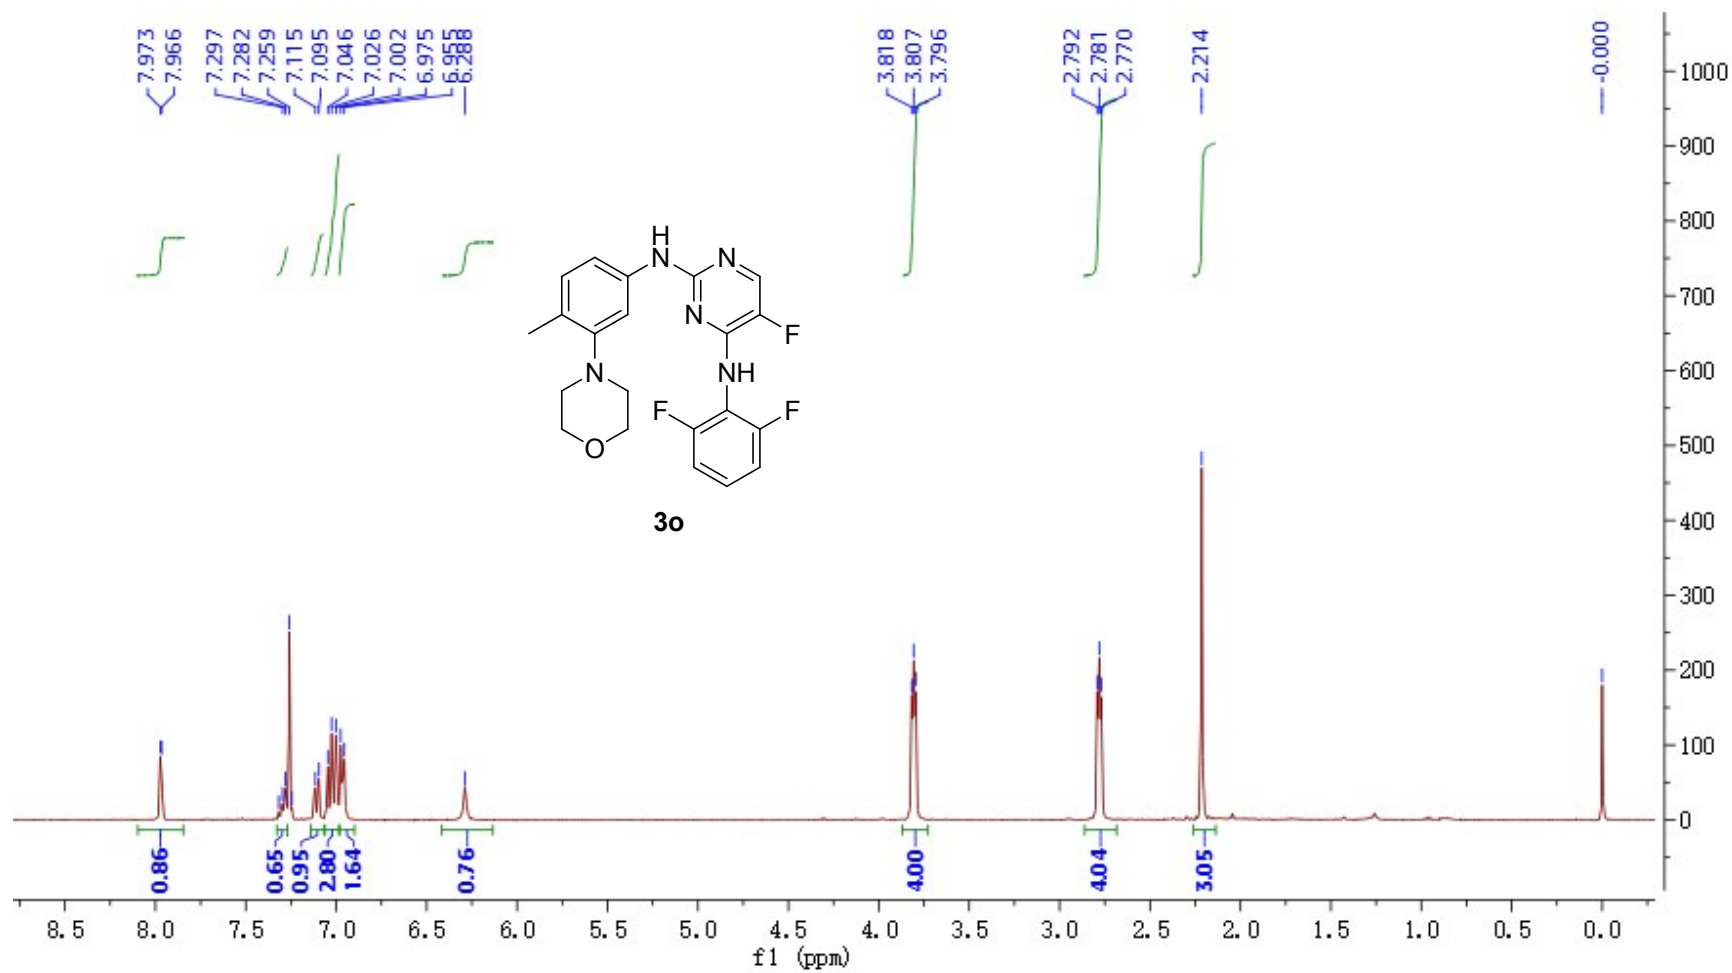

<sup>13</sup>C NMR spectrum for Compound 3o:

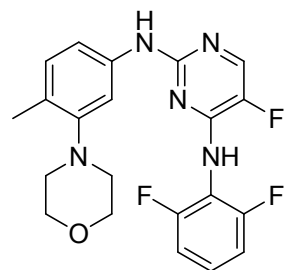

**3o**

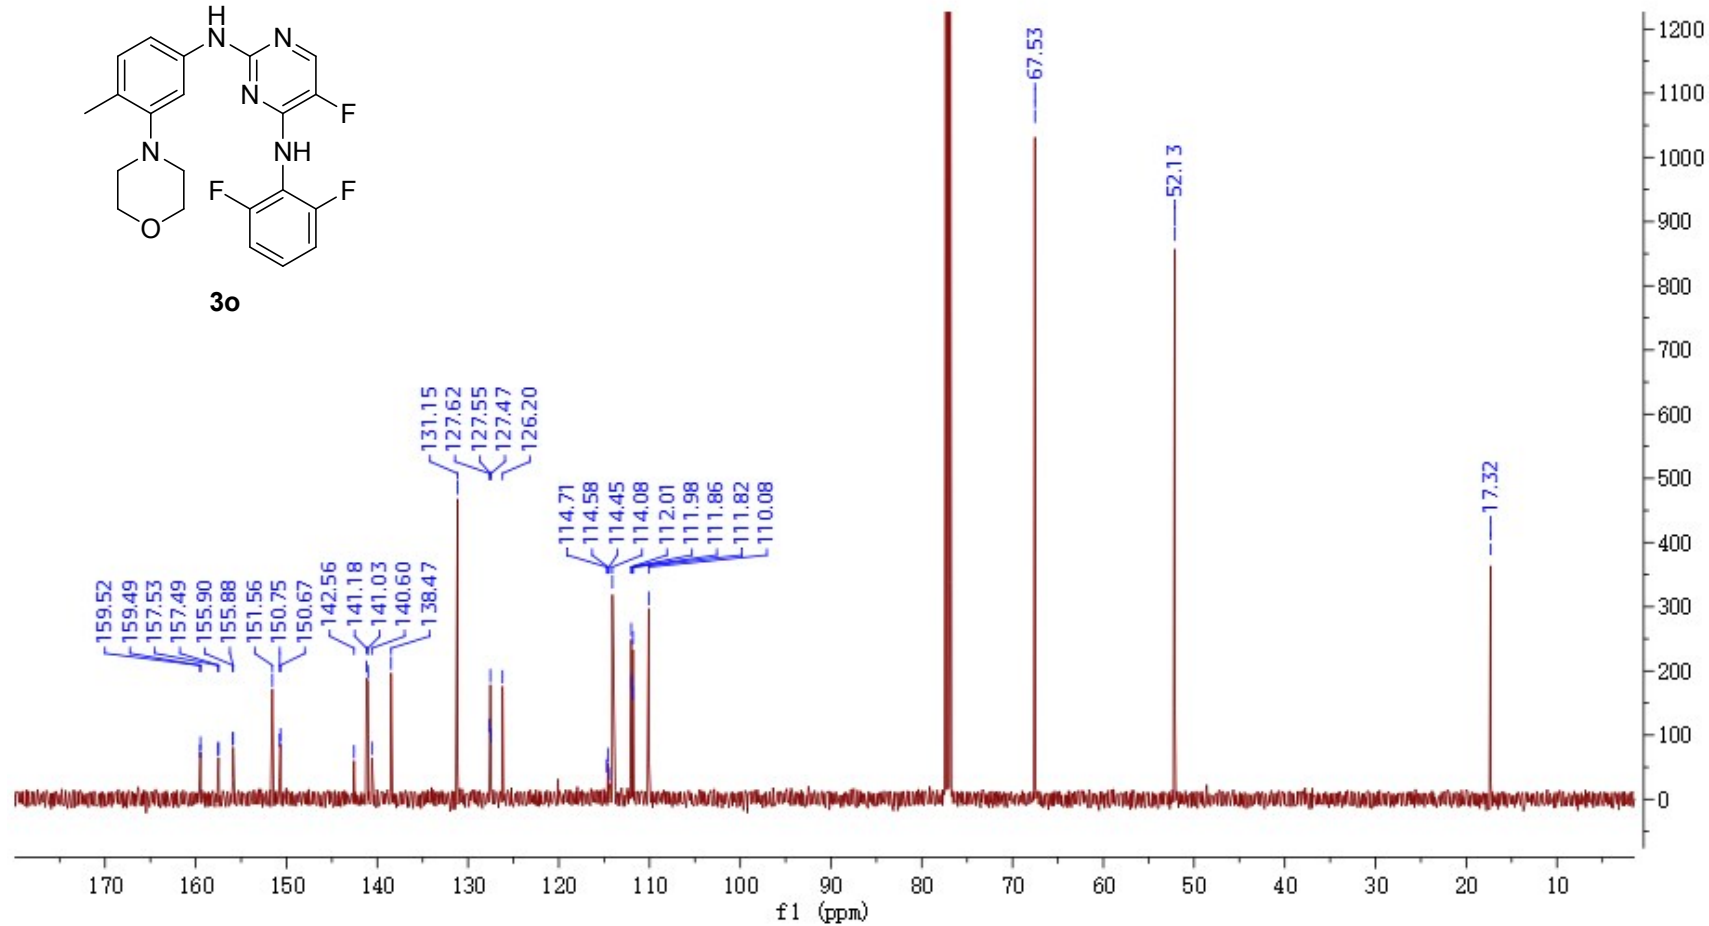

Supplement: c8ra01440j1.pdf [file c8ra01440j1.pdf]
